# Supplementary material for: Understanding the reactivity of geminal P/B and P/Al frustrated Lewis pairs in CO2 addition and H2 activation
Source: Royal Society of Chemistry journal article supplement (doi:10.1039/d1dt01535d), 2021-01-01
Supplement: d1dt01535d1.pdf [file d1dt01535d1.pdf]

## Supplementary Information

# Understanding the Reactivity of Geminal P/B and P/Al Frustrated Lewis Pairs in CO<sub>2</sub> Addition and H<sub>2</sub> Activation

Muhammad Dzulfahmi Ramadhan<sup>†</sup> and Panida Surawatanawong<sup>\*,†,‡</sup>

<sup>†</sup>*Department of Chemistry and Center of Excellence for Innovation in Chemistry, Faculty of Science, Mahidol University, Bangkok 10400, Thailand*

<sup>‡</sup>*Center of Sustainable Energy and Green Materials, Mahidol University, Salaya, Nakhon Pathom 73170, Thailand*

\*E-mail: [panida.sur@mahidol.ac.th](mailto:panida.sur@mahidol.ac.th)

ORCID: 0000-0002-0300-4205

### Table of contents

|                                                                                                                                                                                                       |       |
|-------------------------------------------------------------------------------------------------------------------------------------------------------------------------------------------------------|-------|
| <b>Table S1.</b> Solvent-corrected relative energies of <b>PZ<sup>b</sup></b> (Z = B, Al) in CO <sub>2</sub> addition and H <sub>2</sub> calculated in ωB97XD/BS2 and PBE0/BS2 functional             | S2    |
| <b>Table S2.</b> Second-order perturbative energy of <b>TS14_PZ<sup>a</sup></b> and <b>TS13_PZ<sup>a</sup></b>                                                                                        | S2    |
| <b>Table S3.</b> Distortion-interaction energies and natural energy decomposition analysis (NEDA) of <b>TS14_PZ<sup>a</sup></b> and <b>TS13_PZ<sup>a</sup></b>                                        | S3    |
| <b>Table S4.</b> Absolute electronic energies, enthalpies, entropies, and Gibbs free energies                                                                                                         | S3-S5 |
| <b>Fig. S1</b> Optimized geometries of transition states and products from the CO <sub>2</sub> addition to <b>1PZ<sup>a</sup></b> (Z = B, Al)                                                         | S5    |
| <b>Fig. S2</b> Optimized geometries of <b><sup>t</sup>Bu<sub>3</sub>P/BPh<sub>3</sub></b> , <b>1PB<sup>b</sup></b> , <b>1PB<sup>c</sup></b> , and <b>1PB<sup>d</sup></b> in CO <sub>2</sub> addition  | S6    |
| <b>Fig. S3</b> Optimized geometries of <b>1PB<sup>e</sup></b> , <b>1PB<sup>f</sup></b> and <b>1PB<sup>a</sup></b> in CO <sub>2</sub> addition                                                         | S7    |
| <b>Fig. S4</b> Optimized geometries of <b><sup>t</sup>Bu<sub>3</sub>P/BPh<sub>3</sub></b> , <b>1PB<sup>b</sup></b> , <b>1PB<sup>c</sup></b> , and <b>1PB<sup>d</sup></b> in H <sub>2</sub> activation | S8    |
| <b>Fig. S5</b> Optimized geometries of <b>1PB<sup>e</sup></b> , <b>1PB<sup>f</sup></b> and <b>1PB<sup>a</sup></b> in H <sub>2</sub> activation                                                        | S9    |
| <b>Fig. S6</b> Optimized geometries of <b>1PAI<sup>b</sup></b> , <b>1PAI<sup>c</sup></b> , and <b>1PAI<sup>d</sup></b> in H <sub>2</sub> activation                                                   | S10   |
| <b>Fig. S7</b> Optimized geometries of <b>1PAI<sup>e</sup></b> , <b>1PAI<sup>f</sup></b> and <b>1PAI<sup>a</sup></b> in H <sub>2</sub> activation                                                     | S11   |
| <b>Scheme S1.</b> Five partitioning steps contributed to the reaction energy of H <sub>2</sub> activation by BPh <sub>3</sub> /P <sup>t</sup> Bu <sub>3</sub>                                         | S12   |
| Cartesian coordinates                                                                                                                                                                                 | S13   |

**Table S1.** Solvent-corrected relative energies (in kcal/mol) for the reactions of **1PZ<sup>b</sup>** (Z = B, Al) in the CO<sub>2</sub> addition and the H<sub>2</sub> activation calculated by  $\omega$ B97XD/BS2 and PBE0/BS2 on the gas-phase geometries optimized by  $\omega$ B97XD/BS1.

| <i>CO<sub>2</sub> addition</i> | $\omega$ B97XD/BS2 | PBE0/BS2 | <i>H<sub>2</sub> activation</i> | $\omega$ B97XD/BS2 | PBE0/BS2 |
|--------------------------------|--------------------|----------|---------------------------------|--------------------|----------|
| <b>1PB<sup>b</sup></b>         | 0.0                | 0.0      | <b>1PB<sup>b</sup></b>          | 0.0                | 0.0      |
| <b>TS14_PB<sup>b</sup></b>     | 13.1               | 12.3     | <b>TS13_PB<sup>b</sup></b>      | 25.3               | 21.0     |
| <b>4PB<sup>b</sup></b>         | -12.4              | -13.1    | <b>3PB<sup>b</sup></b>          | -4.4               | -5.0     |
| <b>1PAI<sup>b</sup></b>        | 0.0                | 0.0      | <b>1PAI<sup>b</sup></b>         | 0.0                | 0.0      |
| <b>TS14_PAI<sup>b</sup></b>    | 5.1                | 8.3      | <b>TS13_PAI<sup>b</sup></b>     | 18.5               | 15.2     |
| <b>4PAI<sup>b</sup></b>        | -25.6              | -24.9    | <b>3PAI<sup>b</sup></b>         | -5.3               | -3.7     |

BS1 (basis set 1) is the 6-31++G(d,p) for P, Al, B, and C, O, and H of the substrates involved in the reaction (H<sub>2</sub> and CO<sub>2</sub>) and 6-31G(d) for all other atoms. Quasi-harmonic correction was applied for all free energies.

BS2 (basis set 2) is the 6-311++G(d,p) basis set for all atoms.

**Table S2.** Second-order perturbative energy ( $\Delta E^{(2)}$ ) (kcal/mol) from donor orbital to acceptor orbital of CO<sub>2</sub> addition and H<sub>2</sub> activation transition states (**TS14\_PZ<sup>a</sup>** and **TS13\_PZ<sup>a</sup>**) (Z = B, Al).

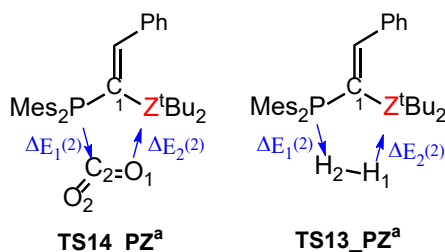

| <i>CO<sub>2</sub> addition</i>  | Donor                  | Acceptor                 | <b>TS14_PB<sup>a</sup></b> | <b>TS14_PAI<sup>a</sup></b> |
|---------------------------------|------------------------|--------------------------|----------------------------|-----------------------------|
|                                 | LP(P)                  | $\pi^*(\text{C2-O1})$    | 2.1                        | 0.3                         |
| $\Delta E_1^{(2)}$              | LP(P)                  | $\pi^*(\text{C2-O2})$    | 58.8                       | 18.9                        |
| $\Delta E_2^{(2)}$              | LP(O1)                 | LV(Z)                    | 22.0                       | 0.9                         |
| <i>H<sub>2</sub> activation</i> | Donor                  | Acceptor                 | <b>TS13_PB<sup>a</sup></b> | <b>TS13_PAI<sup>a</sup></b> |
|                                 | LP(P)                  | $\sigma^*(\text{H1-H2})$ | 157.7                      | 273.9                       |
| $\Delta E_2^{(2)}$              | $\sigma(\text{H1-H2})$ | LV(Z)                    | 249.4                      | 77.7                        |

**Table S3.** Distortion-interaction energies (in kcal/mol) and natural energy decomposition analysis (NEDA) of CO<sub>2</sub> addition and H<sub>2</sub> activation transition states (TS14\_PZ<sup>a</sup> and TS13\_PZ<sup>a</sup>).

|                                      | CO <sub>2</sub>      |                       | H <sub>2</sub>       |                       |
|--------------------------------------|----------------------|-----------------------|----------------------|-----------------------|
|                                      | TS14_PB <sup>a</sup> | TS14_PAI <sup>a</sup> | TS13_PB <sup>a</sup> | TS13_PAI <sup>a</sup> |
| <i>Distortion-interaction energy</i> |                      |                       |                      |                       |
| $\Delta E^\ddagger$                  | 9.5                  | -4.0                  | 17.4                 | 13.0                  |
| $\Delta E_{\text{dist\_PZ}}$         | 7.5                  | 5.4                   | 16.3                 | 14.1                  |
| $\Delta E_{\text{dist\_sub}}$        | 16.9                 | 5.1                   | 16.2                 | 25.1                  |
| $\Delta E_{\text{int}}$              | -14.8                | -14.4                 | -15.2                | -26.2                 |
| <i>NEDA</i>                          |                      |                       |                      |                       |
| $\Delta E_{\text{el}}$               | -77.1                | -58.5                 | -53.8                | -52.5                 |
| $\Delta E_{\text{ct}}$               | -115.7               | -93.8                 | -298.6               | -233.6                |
| $\Delta E_{\text{core}}$             | 184.0                | 143.4                 | 335.9                | 260.1                 |
| $\Delta E_{\text{int}}$              | -8.8                 | -9.0                  | -16.4                | -26.0                 |

**Table S4.** Absolute electronic energies, enthalpies, entropies, Gibbs free energies in gas phase and solvent phase for intermediates and transition states of all complexes involved in CO<sub>2</sub> addition and H<sub>2</sub> activation. Geometry structure of complexes in gas phase were optimized using  $\omega$ B97XD/BS1, and the solvent correction is in dichloromethane using  $\omega$ B97XD/BS2).\*

| Complex                                              | $\omega$ B97XD/BS1  |                             |                            |             |                            |                             | $\omega$ B97XD/BS2          |
|------------------------------------------------------|---------------------|-----------------------------|----------------------------|-------------|----------------------------|-----------------------------|-----------------------------|
|                                                      | Imaginary Frequency | $E_{\text{elec}}$ (hartree) | $H_{\text{gas}}$ (hartree) | S (cal/mol) | $G_{\text{gas}}$ (hartree) | $G_{\text{qhts}}$ (hartree) | $G_{\text{solv}}$ (hartree) |
| H <sub>2</sub>                                       | -                   | -1.175283845                | -1.161841845               | 31.134      | -1.176634845               | -1.168695                   | -1.175807497                |
| CO <sub>2</sub>                                      | -                   | -188.524613                 | -188.509236                | 51.075      | -188.533503                | -188.39679                  | -188.5803889                |
| PtBu <sub>3</sub>                                    | -                   | -814.7348546                | -814.3407566               | 123.532     | -814.3994506               | -814.400078                 | -814.9015096                |
| BPh <sub>3</sub>                                     | -                   | -719.5729459                | -719.2754899               | 124.267     | -719.3345339               | -719.334631                 | -719.7669945                |
| TS14 <sup>t</sup> Bu <sub>3</sub> P/BPh <sub>3</sub> | -157.8i             | -1722.840505                | -1722.131659               | 225.433     | -1722.23877                | -1722.237858                | -1723.252557                |
| 4 <sup>t</sup> Bu <sub>3</sub> P/BPh <sub>3</sub>    | -                   | -1722.856847                | -1722.14609                | 216.163     | -1722.248796               | -1722.24821                 | -1723.280594                |
| 1PB <sup>b</sup>                                     | -                   | -1184.247574                | -1183.754931               | 167.099     | -1183.834325               | -1183.833644                | -1184.508885                |
| TS14 PB <sup>b</sup>                                 | -178.3i             | -1372.769215                | -1372.26047                | 180.093     | -1372.346038               | -1372.345522                | -1373.087088                |
| 4PB <sup>b</sup>                                     | -                   | -1372.80594                 | -1372.296144               | 178.934     | -1372.381162               | -1372.380055                | -1373.129846                |
| 1PB <sup>c</sup>                                     | -                   | -1222.312631                | -1221.813285               | 167.163     | -1221.892709               | -1221.892734                | -1222.582424                |
| TS14 PB <sup>c</sup>                                 | -184.0i             | -1410.832493                | -1410.317439               | 181.604     | -1410.403725               | -1410.403495                | -1411.156984                |
| 4PB <sup>c</sup>                                     | -                   | -1410.86927                 | -1410.353                  | 180.669     | -1410.438842               | -1410.4382                  | -1411.20018                 |
| 1PB <sup>d</sup>                                     | -                   | -1567.607673                | -1567.001198               | 200.74      | -1567.096576               | -1567.096255                | -1567.962299                |
| TS14 PB <sup>d</sup>                                 | -166.9i             | -1756.121279                | -1755.499969               | 216.76      | -1755.602959               | -1755.602227                | -1756.531533                |
| 4PB <sup>d</sup>                                     | -                   | -1756.147302                | -1755.523795               | 211.229     | -1755.624156               | -1755.62317                 | -1756.560627                |

| Complex                                  | ωB97XD/BS1          |                             |                            |             |                            |                             | ωB97XD/BS2                  |
|------------------------------------------|---------------------|-----------------------------|----------------------------|-------------|----------------------------|-----------------------------|-----------------------------|
|                                          | Imaginary Frequency | E <sub>elec</sub> (hartree) | H <sub>gas</sub> (hartree) | S (cal/mol) | G <sub>gas</sub> (hartree) | G <sub>qhts</sub> (hartree) | G <sub>solv</sub> (hartree) |
| 1PB <sup>e</sup>                         | -                   | -1420.062624                | -1419.391238               | 205.004     | -1419.488642               | -1419.488083                | -1420.38343                 |
| TS14 PB <sup>e</sup>                     | -198.6i             | -1608.576912                | -1607.889396               | 214.717     | -1607.991415               | -1607.991545                | -1608.952349                |
| 4PB <sup>e</sup>                         | -                   | -1608.60568                 | -1607.916862               | 209.648     | -1608.016472               | -1608.016335                | -1608.982294                |
| 1PB <sup>f</sup>                         | -                   | -1458.123441                | -1457.445975               | 204.792     | -1457.543279               | -1457.543565                | -1458.449982                |
| TS14 PB <sup>f</sup>                     | -182.8i             | -1646.636903                | -1645.943482               | 217.532     | -1646.046839               | -1646.047068                | -1647.018856                |
| 4PB <sup>f</sup>                         | -                   | -1646.665839                | -1645.971041               | 210.043     | -1646.07084                | -1646.071252                | -1647.050146                |
| 1PB <sup>a</sup>                         | -                   | -1689.097998                | -1688.332399               | 225.505     | -1688.439544               | -1688.43951                 | -1689.487151                |
| TS14 PB <sup>a</sup>                     | -181.6i             | -1877.610703                | -1876.829335               | 236.183     | -1876.941553               | -1876.941367                | -1878.054218                |
| 4PB <sup>a</sup>                         | -                   | -1877.635023                | -1876.852737               | 235.07      | -1876.964426               | -1876.964033                | -1878.078921                |
| TS14 PAI <sup>b</sup>                    | -82.6i              | -1590.347069                | -1589.84331                | 188.542     | -1589.932893               | -1589.932035                | -1590.681049                |
| 4PAI <sup>b</sup>                        | -                   | -1590.392740                | -1589.88702                | 189.379     | -1589.977001               | -1589.975011                | -1590.732649                |
| TS14 PAI <sup>a</sup>                    | -129.0i             | -2095.213617                | -2094.438613               | 248.571     | -2094.556717               | -2094.556823                | -2095.672329                |
| 4PAI <sup>a</sup>                        | -                   | -2095.243544                | -2094.466159               | 244.953     | -2094.582544               | -2094.582116                | -2095.704105                |
| TS13 'Bu <sub>3</sub> P/BPh <sub>3</sub> | -351.4i             | -1535.483652                | -1534.774756               | 207.121     | -1534.873166               | -1534.872536                | -1535.843462                |
| 3 'Bu <sub>3</sub> P/BPh <sub>3</sub>    | -                   | -1535.494825                | -1534.782448               | 208.6       | -1534.88156                | -1534.881408                | -1535.872679                |
| TS13 PB <sup>b</sup>                     | -916.4i             | -1185.394208                | -1184.88701                | 165.689     | -1184.965735               | -1184.96535                 | -1185.660693                |
| 3PB <sup>b</sup>                         | -                   | -1185.436319                | -1184.923694               | 165.012     | -1185.002097               | -1185.001955                | -1185.713529                |
| TS13 PB <sup>c</sup>                     | -907.4i             | -1223.458882                | -1222.945307               | 168.801     | -1223.02551                | -1223.025295                | -1223.733552                |
| 3PB <sup>c</sup>                         | -                   | -1223.499883                | -1222.981354               | 171.376     | -1223.06278                | -1223.062268                | -1223.783842                |
| TS13 PB <sup>d</sup>                     | -820.8i             | -1568.748101                | -1568.127854               | 207.474     | -1568.226432               | -1568.225033                | -1569.106728                |
| 3PB <sup>d</sup>                         | -                   | -1568.784568                | -1568.159476               | 210.497     | -1568.25949                | -1568.257353                | -1569.152755                |
| TS13 PB <sup>e</sup>                     | -973.3i             | -1421.209264                | -1420.523345               | 201.219     | -1420.618951               | -1420.619075                | -1421.531247                |
| 3PB <sup>e</sup>                         | -                   | -1421.242934                | -1420.552164               | 204.465     | -1420.649311               | -1420.648775                | -1421.573719                |
| TS13 PB <sup>f</sup>                     | -924.5i             | -1459.270492                | -1458.579165               | 204.882     | -1458.676511               | -1458.676726                | -1459.600673                |
| 3PB <sup>f</sup>                         | -                   | -1459.298664                | -1458.601515               | 203.611     | -1458.698258               | -1458.698462                | -1459.637056                |
| TS13 PB <sup>a</sup>                     | -923.3i             | -1690.246029                | -1689.466572               | 226.571     | -1689.574223               | -1689.574002                | -1690.636674                |
| 3PB <sup>a</sup>                         | -                   | -1690.27211                 | -1689.487944               | 229.968     | -1689.597209               | -1689.596807                | -1690.670004                |
| 1PAI <sup>b</sup>                        | -                   | -1401.811416                | -1401.323141               | 175.092     | -1401.406333               | -1401.405311                | -1402.09101                 |
| TS13 PAI <sup>b</sup>                    | -940.7i             | -1402.966609                | -1402.464942               | 176.524     | -1402.548815               | -1402.547779                | -1403.25143                 |
| 3PAI <sup>b</sup>                        | -                   | -1402.999787                | -1402.494324               | 177.665     | -1402.578738               | -1402.577776                | -1403.292477                |
| 1PAI <sup>c</sup>                        | -                   | -1439.869591                | -1439.374859               | 180.246     | -1439.4605                 | -1439.459478                | -1440.157414                |
| TS13 PAI <sup>c</sup>                    | -894.9i             | -1441.027718                | -1440.519558               | 184.078     | -1440.607019               | -1440.605346                | -1441.318966                |
| 3PAI <sup>c</sup>                        | -                   | -1441.059594                | -1440.547433               | 180.824     | -1440.633348               | -1440.632596                | -1441.359337                |
| pre 1PAI <sup>d</sup>                    | -                   | -1785.174096                | -1784.572152               | 208.36      | -1784.67115                | -1784.670414                | -1785.545646                |
| 1PAI <sup>d</sup>                        | -                   | -1785.161567                | -1784.560581               | 215.694     | -1784.663064               | -1784.661328                | -1785.534093                |

| Complex               | $\omega$ B97XD/BS1  |                      |                     |             |                     |                      | $\omega$ B97XD/BS2   |
|-----------------------|---------------------|----------------------|---------------------|-------------|---------------------|----------------------|----------------------|
|                       | Imaginary Frequency | $E_{elec}$ (hartree) | $H_{gas}$ (hartree) | S (cal/mol) | $G_{gas}$ (hartree) | $G_{qHHS}$ (hartree) | $G_{solv}$ (hartree) |
| TS13_PAl <sup>d</sup> | -823.6i             | -1786.323045         | -1785.708501        | 213.795     | -1785.810082        | -1785.80856          | -1786.697943         |
| 3PAI <sup>d</sup>     | -                   | -1786.354235         | -1785.735326        | 215.715     | -1785.837819        | -1785.836317         | -1786.73595          |
| 1PAI <sup>e</sup>     | -                   | -1637.629605         | -1636.964086        | 215.76      | -1637.0666          | -1637.065879         | -1637.967181         |
| TS13_PAI <sup>e</sup> | -888.1i             | -1638.785424         | -1638.106783        | 214.799     | -1638.208841        | -1638.208379         | -1639.124339         |
| 3PAI <sup>e</sup>     | -                   | -1638.808351         | -1638.12584         | 216.292     | -1638.228607        | -1638.228218         | -1639.15587          |
| 1PAI <sup>f</sup>     | -                   | -1675.69179          | -1675.020004        | 219.745     | -1675.124413        | -1675.124034         | -1676.036217         |
| TS13_PAI <sup>f</sup> | -968.2i             | -1676.849017         | -1676.16418         | 219.323     | -1676.268387        | -1676.268047         | -1677.195937         |
| 3PAI <sup>f</sup>     | -                   | -1676.869229         | -1676.179273        | 218.644     | -1676.283158        | -1676.282659         | -1677.224426         |
| 1PAI <sup>g</sup>     | -                   | -1906.681708         | -1905.922279        | 236.352     | -1906.034578        | -1906.03429          | -1907.085163         |
| TS13_PAI <sup>g</sup> | -1010.7i            | -1907.835889         | -1907.06329         | 240.331     | -1907.177479        | -1907.176558         | -1908.24341          |
| 3PAI <sup>g</sup>     | -                   | -1907.852144         | -1907.07521         | 242.219     | -1907.190296        | -1907.189422         | -1908.2681           |

\*BS1 (basis set 1) is the 6-31++G(d,p) for P, Al, B, and C, O, and H of the substrates involved in the reaction ( $H_2$  and  $CO_2$ ) and 6-31G(d) for all other atoms. Quasi-harmonic correction was applied to all free energies ( $G_{qHHS}$ ).

BS2 (basis set 2) is the 6-311++G(d,p) basis set for all atoms.

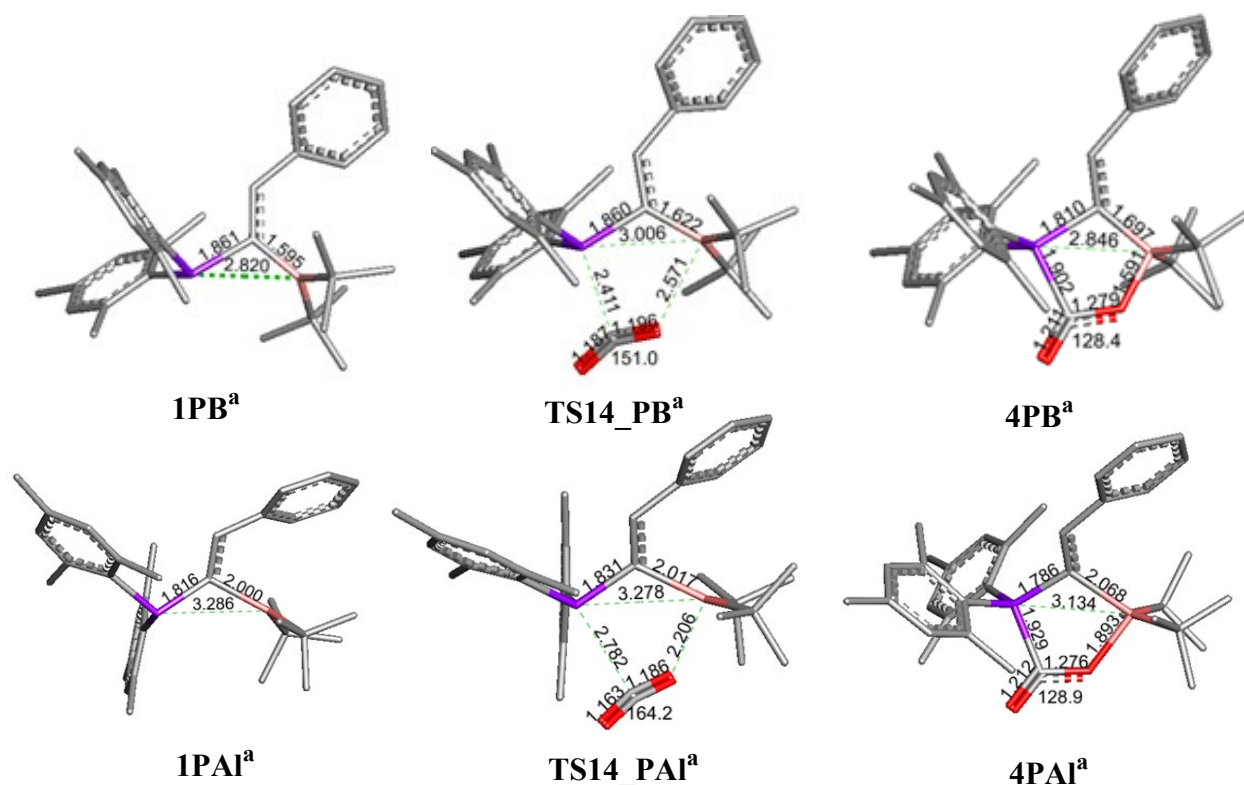

**Fig. S1** Optimized geometries of transition states and products from the  $CO_2$  addition to  $1PZ^a$  ( $Z = B, Al$ ). The selected bond distances are shown in Å. Hydrogen atoms are omitted for clarity.

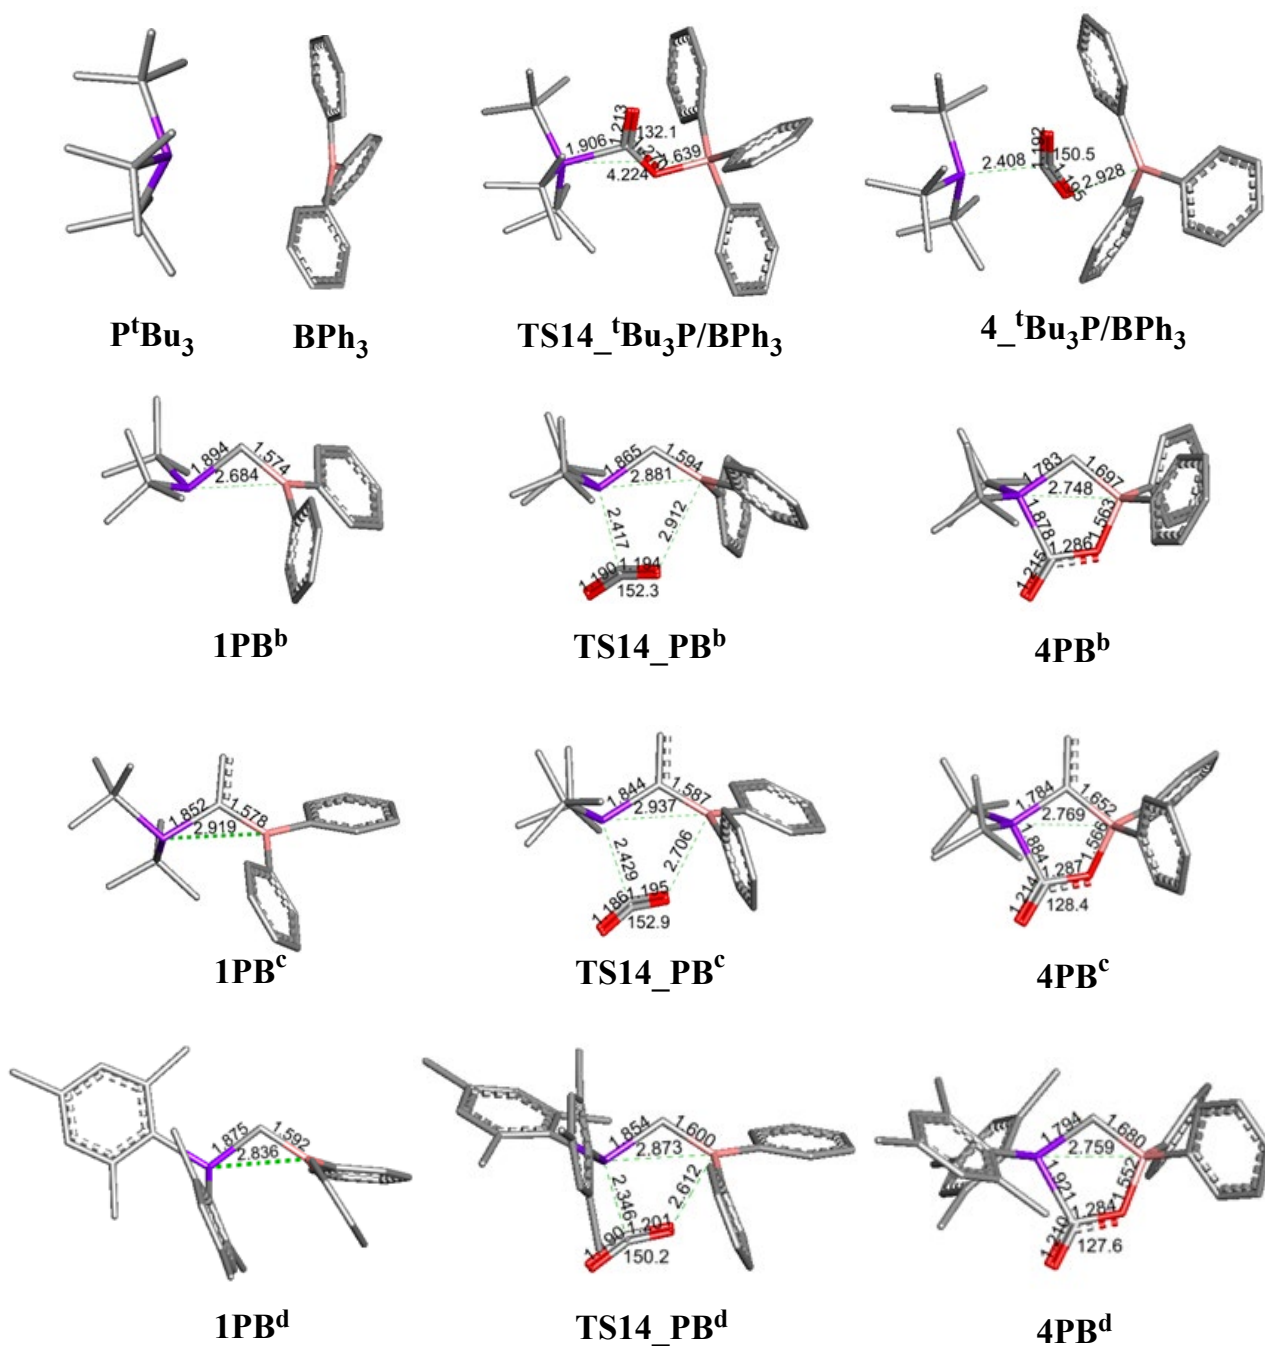

**Fig. S2** Optimized geometries of  $t\text{Bu}_3\text{P/BPh}_3$ ,  $1\text{PB}^b$ ,  $1\text{PB}^c$ , and  $1\text{PB}^d$  compounds. The transition states, and products from  $\text{CO}_2$  addition ( $\text{TS14\_PB}$  and  $4\text{PB}$ ). The selected bond distances are shown in Å. Hydrogen atoms are omitted for clarity.

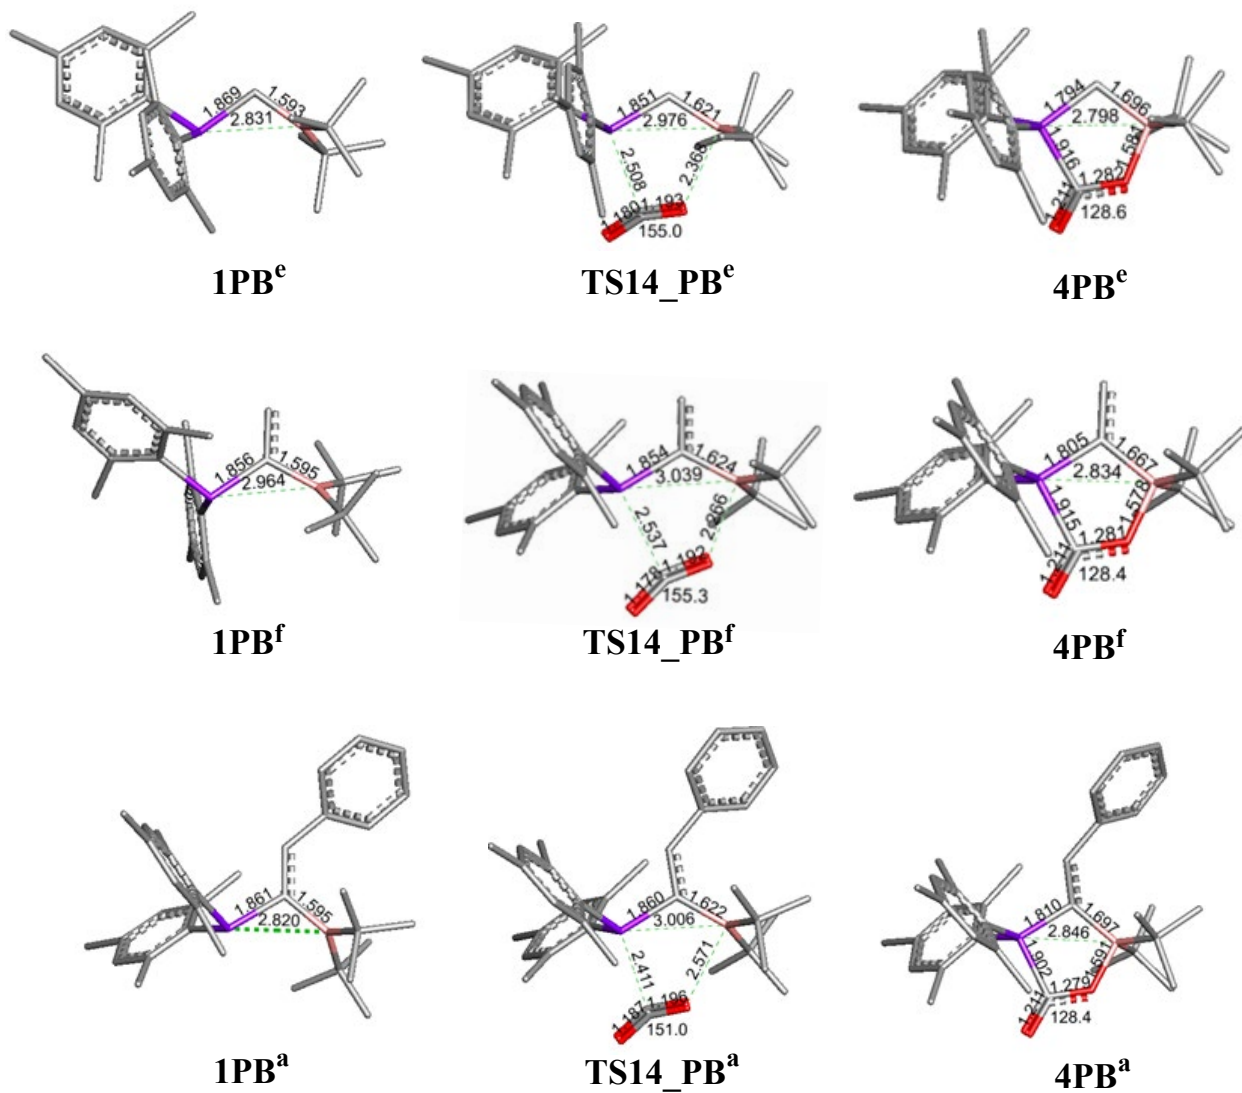

**Fig. S3** Optimized geometries of 1PB<sup>e</sup>, 1PB<sup>f</sup> and 1PB<sup>a</sup> compounds. The transition states, and products from CO<sub>2</sub> addition (TS14\_PB and 4PB). The selected bond distances are shown in Å. Hydrogen atoms are omitted for clarity.

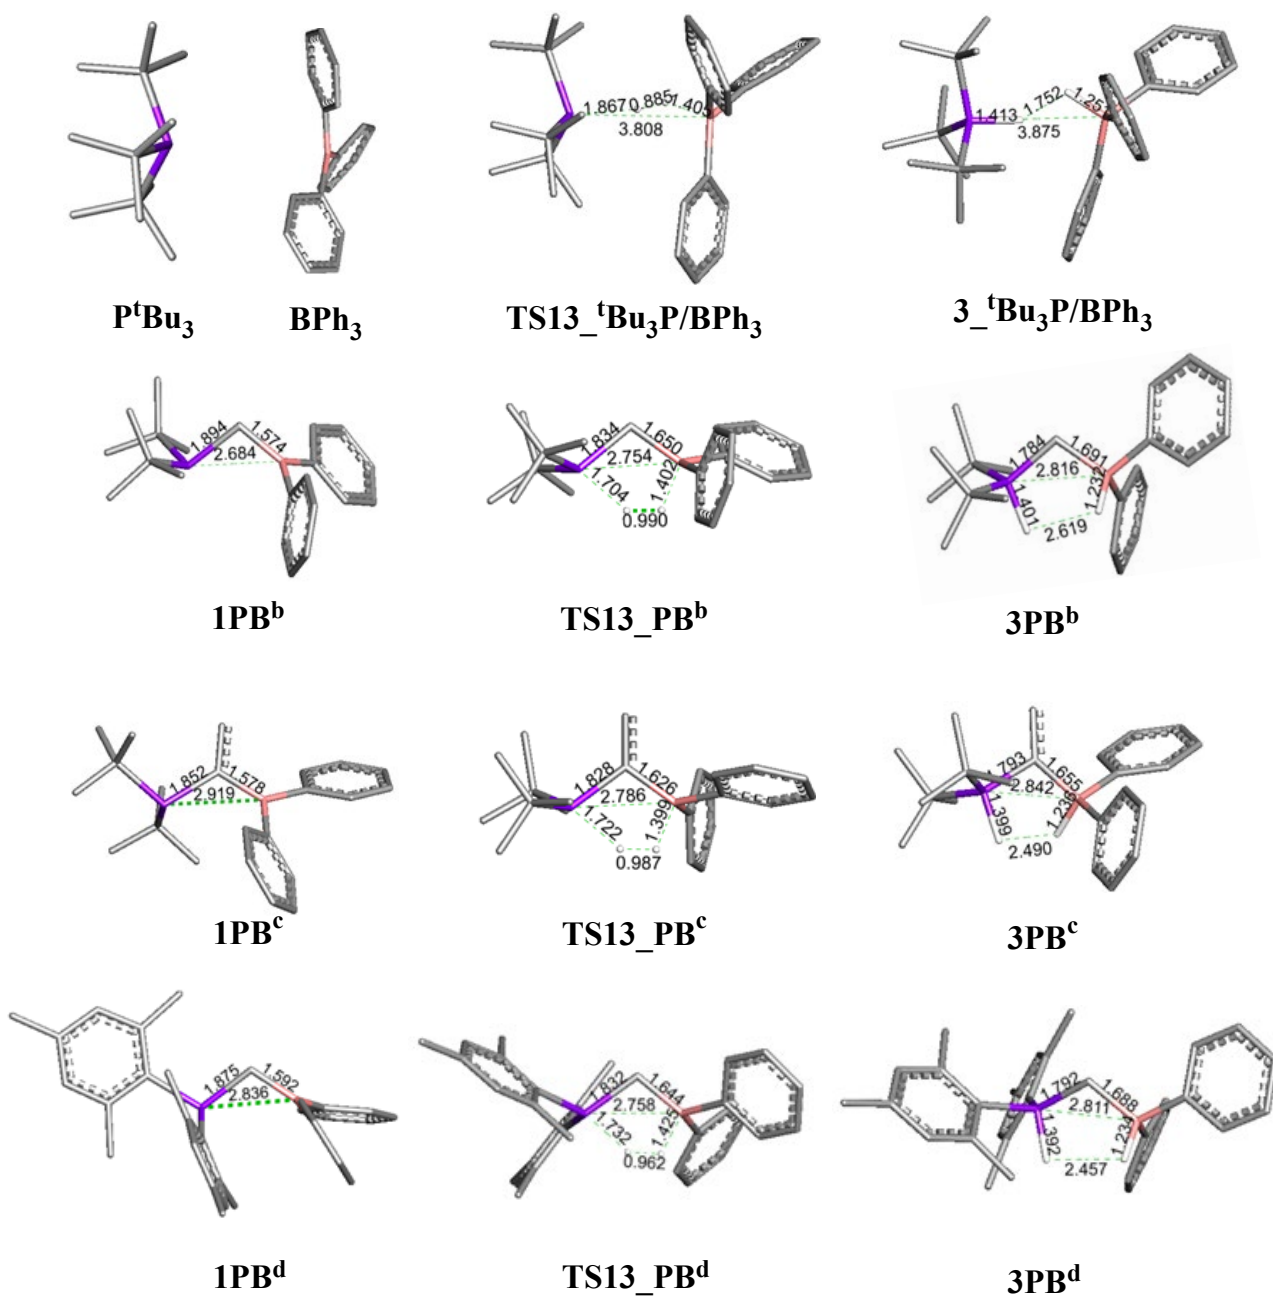

**Fig. S4** Optimized geometries of  $t\text{Bu}_3\text{P}/\text{BPh}_3$ ,  $1\text{PB}^b$ ,  $1\text{PB}^c$ , and  $1\text{PB}^d$  compounds. The transition states, and products from  $\text{H}_2$  activation (TS13\_  $\text{PB}$  and 3PB). The selected bond distances are shown in Å. Hydrogen atoms are omitted for clarity except for those of  $\text{H}_2$ .



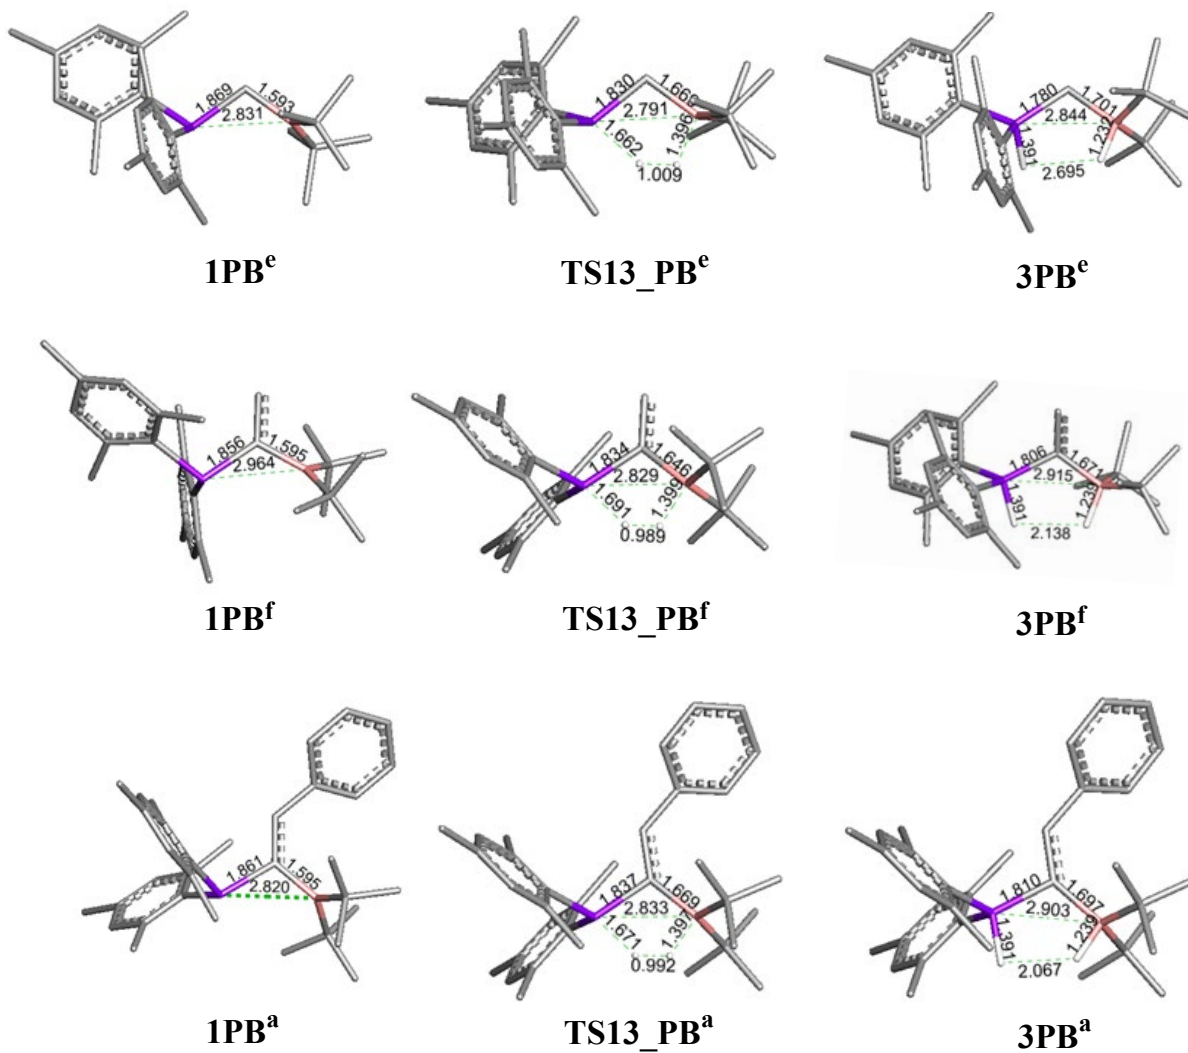

**Fig. S5** Optimized geometries of 1PB<sup>e</sup>, 1PB<sup>f</sup> and 1PB<sup>a</sup> compounds. The transition states, and products from H<sub>2</sub> activation (TS13\_PB and 3PB). The selected bond distances are shown in Å. Hydrogen atoms are omitted for clarity except for those of H<sub>2</sub>.

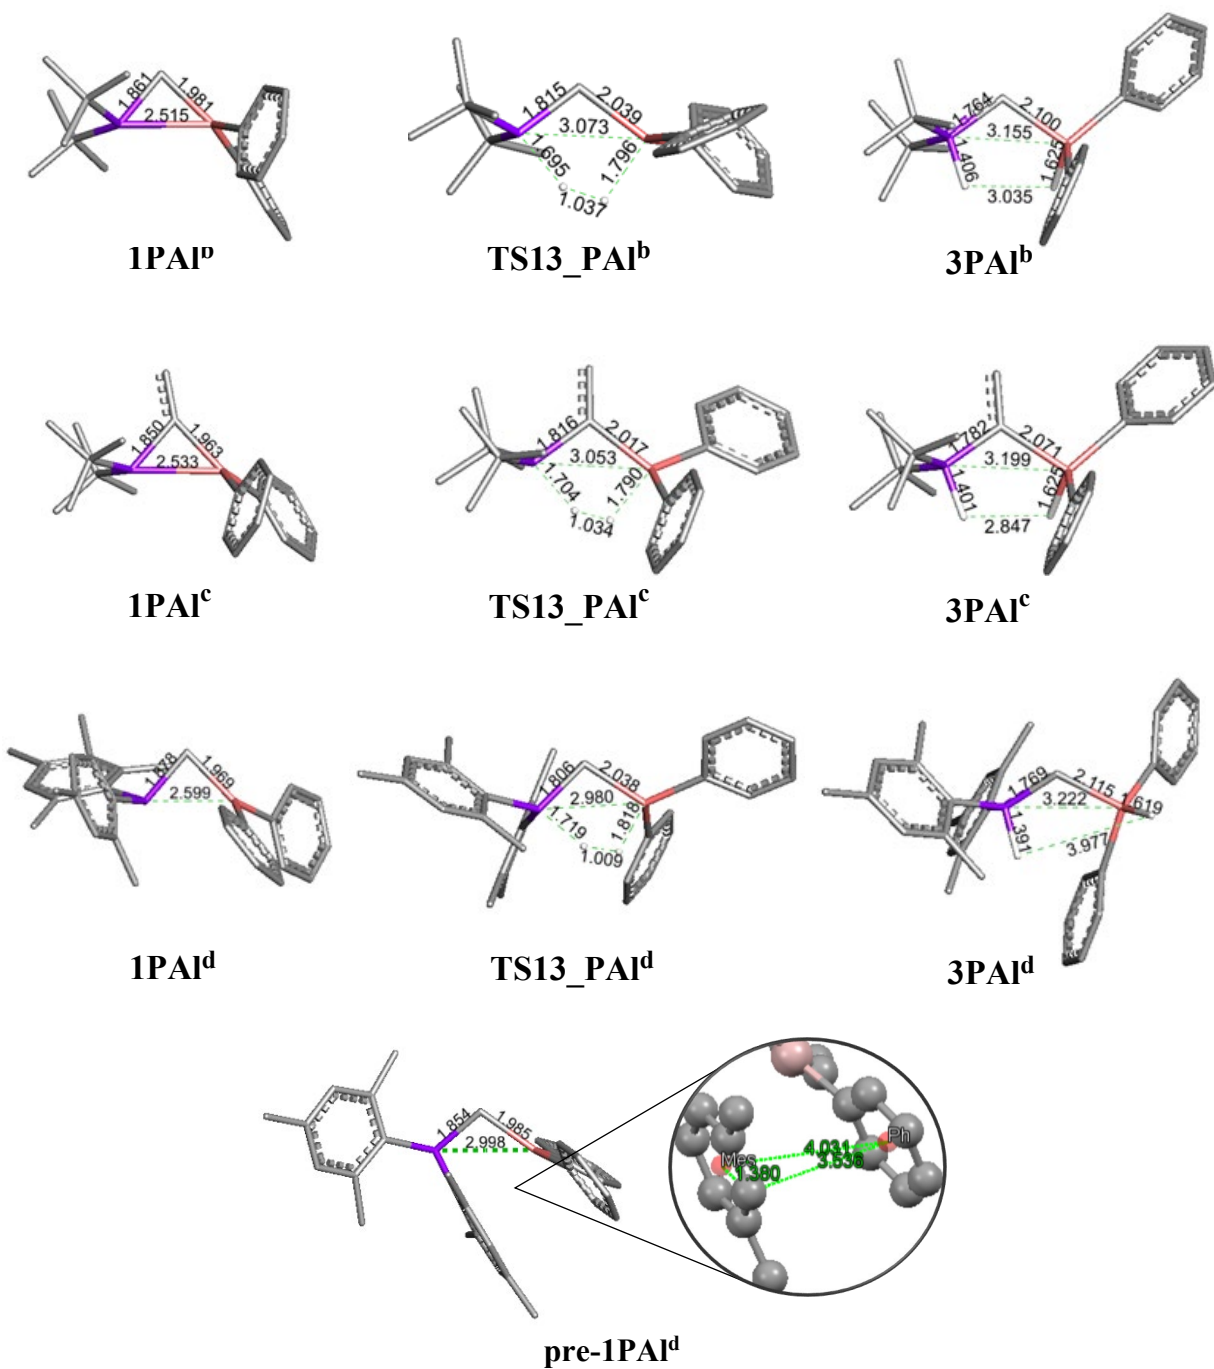

**Fig. S6** Optimized geometries of 1PAI<sup>b</sup>, 1PAI<sup>c</sup>, and 1PAI<sup>d</sup> compounds. The transition states, and products from H<sub>2</sub> activation (TS13\_PAIm and 3PAIm). The selected bond distances are shown in Å. Hydrogen atoms are omitted for clarity except for those of H<sub>2</sub>.

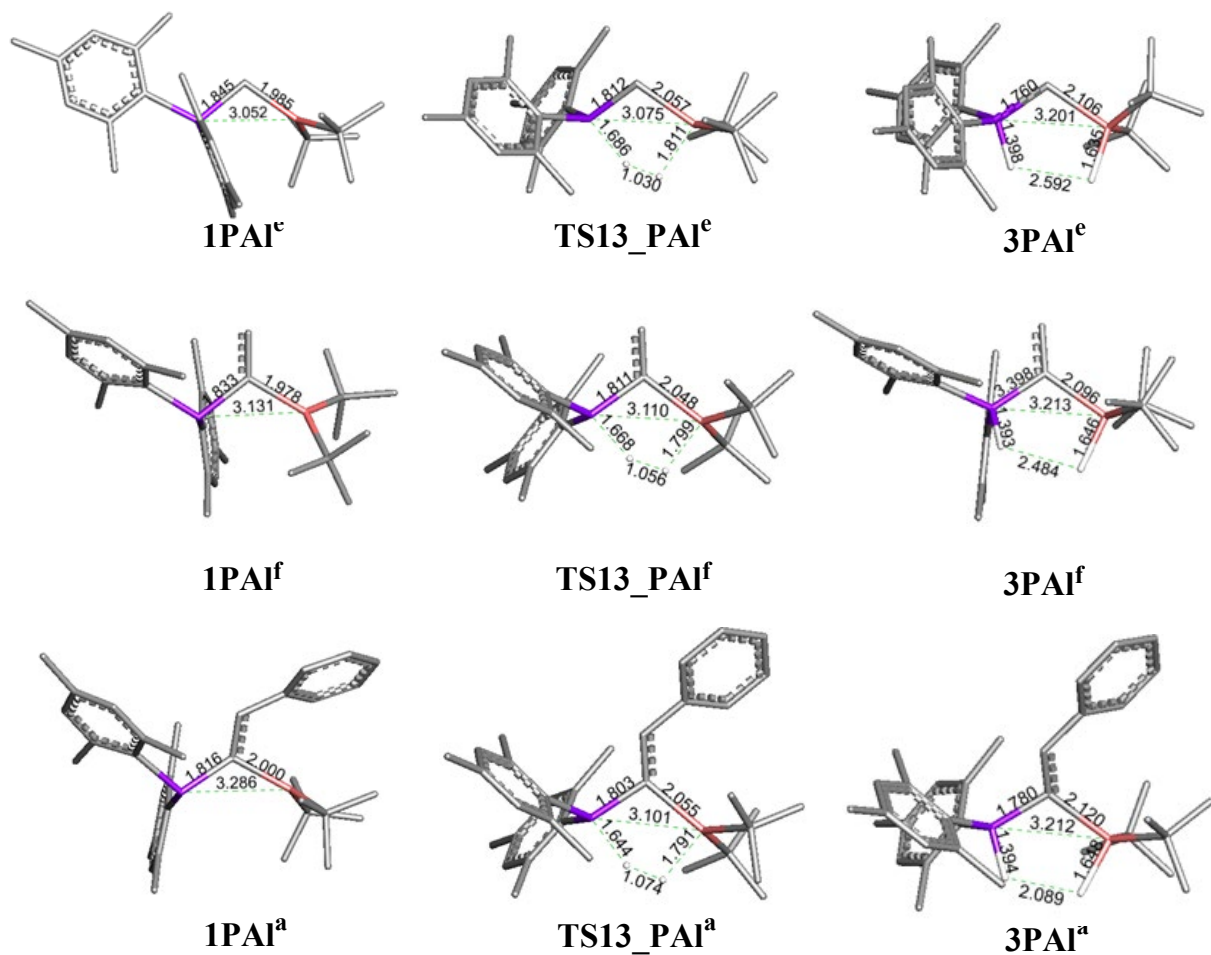

**Fig. S7** Optimized geometries of 1PAI<sup>e</sup>, 1PAI<sup>f</sup> and 1PAI<sup>a</sup> compounds. The transition states, and products from H<sub>2</sub> activation (TS13\_PAIE and 3PAI<sup>e</sup>). The selected bond distances are shown in Å. Hydrogen atoms are omitted for clarity except for those of H<sub>2</sub>.

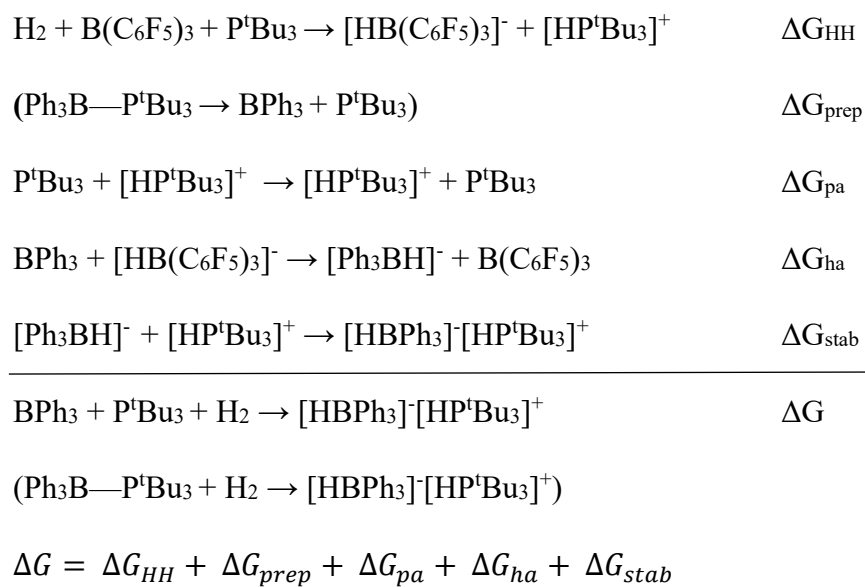

**Scheme S1.** Five partitioning steps contributed to the reaction energy of H<sub>2</sub> activation by BPh<sub>3</sub>/P<sup>t</sup>Bu<sub>3</sub>.

## Cartesian coordinates of optimized geometries

### P<sup>t</sup>Bu<sub>3</sub>

Total number of atoms = 40

|   |              |              |              |
|---|--------------|--------------|--------------|
| C | 2.306330577  | -1.574188998 | -0.222751920 |
| C | 1.783411179  | -0.141191438 | -0.006159922 |
| P | 0.000155125  | 0.000401520  | -0.713445089 |
| C | -0.769586863 | 1.615121162  | -0.006718344 |
| C | -1.995740556 | 1.953566477  | -0.883630730 |
| C | 1.994573530  | 0.226703383  | 1.470806529  |
| C | 2.691410214  | 0.750269273  | -0.882812839 |
| C | -1.014068653 | -1.473221539 | -0.006505165 |
| C | -2.517407397 | -1.209131725 | -0.217201133 |
| C | -0.796958406 | -1.842429840 | 1.469244684  |
| C | -0.698154096 | -2.703331984 | -0.886613896 |
| C | 0.209767468  | 2.784646338  | -0.222536096 |
| C | -1.194005619 | 1.613358288  | 1.470236436  |
| H | 3.384605466  | -1.588942707 | -0.018803181 |
| H | 3.043289201  | 0.045459524  | 1.743683809  |
| H | 3.738911275  | 0.583747965  | -0.598640774 |
| H | 1.845824670  | -2.303417701 | 0.446848908  |
| H | 2.163535047  | -1.906428745 | -1.256717210 |
| H | 1.371466533  | -0.369349345 | 2.142379847  |
| H | 0.218380968  | -2.195855713 | 1.664265925  |
| H | 1.791035710  | 1.281730899  | 1.669309035  |
| H | 2.585224530  | 0.498570981  | -1.943324489 |
| H | 0.325805056  | -3.061731824 | -0.781300588 |
| H | 2.493070208  | 1.815779153  | -0.768115412 |
| H | -1.478994130 | -2.658988682 | 1.743414405  |
| H | -0.997980408 | -1.005498589 | 2.142736386  |
| H | -1.361499273 | -3.529783933 | -0.598577828 |
| H | 1.068444596  | 2.751274822  | 0.451295913  |
| H | -0.872375103 | -2.484710037 | -1.945459433 |
| H | -0.366022047 | 1.372870313  | 2.141943377  |
| H | 0.574242438  | 2.824793605  | -1.254656595 |
| H | -0.317577665 | 3.726272756  | -0.023076774 |
| H | -2.004647023 | 0.907937999  | 1.668606901  |
| H | -1.562939330 | 2.611558495  | 1.743349089  |
| H | -3.068173792 | -2.136512227 | -0.014052867 |
| H | -2.915715099 | -0.447988836 | 0.456954720  |
| H | -2.738423177 | -0.915439803 | -1.249035312 |
| H | -1.722395934 | 1.994144722  | -1.943347419 |
| H | -2.815041365 | 1.243148879  | -0.774851968 |
| H | -2.381806473 | 2.940318876  | -0.595297735 |

**BPh<sub>3</sub>**

Total number of atoms = 34

|   |              |              |              |
|---|--------------|--------------|--------------|
| C | -2.129831558 | -1.338858424 | 0.637524747  |
| C | -1.553232324 | -0.227494658 | -0.003641395 |
| C | -2.425262478 | 0.672692739  | -0.642780105 |
| C | -3.801203144 | 0.469145239  | -0.653278907 |
| C | -4.344541826 | -0.632852744 | 0.003061956  |
| C | -3.506772004 | -1.534892668 | 0.654825168  |
| B | -0.001499019 | -0.000935193 | -0.003696875 |
| C | 0.578424947  | 1.456195545  | -0.003367257 |
| C | 1.786702893  | 1.763525084  | -0.655028472 |
| C | 2.297975041  | 3.057159433  | -0.667318788 |
| C | 1.623744424  | 4.076258818  | 0.001342150  |
| C | 0.432561818  | 3.798916385  | 0.668017709  |
| C | -0.086818678 | 2.508555684  | 0.651561485  |
| C | 0.971513228  | -1.230494278 | -0.002216796 |
| C | 0.634215359  | -2.433949733 | -0.647985624 |
| C | 1.501853936  | -3.521250265 | -0.658768288 |
| C | 2.723895966  | -3.440966558 | 0.005122334  |
| C | 3.078794496  | -2.267048519 | 0.665625374  |
| C | 2.218014671  | -1.174478559 | 0.647481800  |
| H | -1.023747364 | 2.306677505  | 1.163916974  |
| H | -0.094120921 | 4.590572120  | 1.193364045  |
| H | 2.026461011  | 5.085531255  | 0.003028077  |
| H | 2.328810048  | 0.973400417  | -1.167917404 |
| H | 3.225719305  | 3.270307023  | -1.190757260 |
| H | 2.511205215  | -0.259192554 | 1.154948726  |
| H | 4.029452033  | -2.201879504 | 1.187367379  |
| H | 3.399207063  | -4.292229668 | 0.007746838  |
| H | 1.223482884  | -4.434051512 | -1.177893105 |
| H | -0.322256219 | -2.512686937 | -1.158253145 |
| H | -1.484854284 | -2.055782037 | 1.138595082  |
| H | -3.927629626 | -2.394001521 | 1.169550773  |
| H | -5.419825278 | -0.788501221 | 0.006196886  |
| H | -4.451350467 | 1.172845148  | -1.165309678 |
| H | -2.013266904 | 1.542692341  | -1.147162357 |

**TS14\_<sup>t</sup>Bu<sub>3</sub>P/BPh<sub>3</sub>**

Total number of atoms = 77

|   |              |              |              |
|---|--------------|--------------|--------------|
| B | -2.733096497 | -0.042312381 | -0.273040379 |
| C | 0.563042587  | -1.014886274 | 1.188752727  |
| O | 0.849737747  | -2.166247852 | 1.305095958  |
| P | 2.592627124  | 0.006395779  | 0.390377282  |
| C | 3.005967067  | -0.955649629 | -1.206544780 |
| O | -0.237592568 | -0.130911401 | 1.255634398  |

|   |              |              |              |
|---|--------------|--------------|--------------|
| C | 1.691595567  | -1.203944066 | -1.974666892 |
| C | 3.539441280  | -2.357391289 | -0.850805478 |
| C | 4.012005142  | -0.268598482 | -2.143706298 |
| C | 2.333418528  | 1.852457771  | -0.013777758 |
| C | 1.351499383  | 1.956446603  | -1.197661020 |
| C | 1.638208212  | 2.528541995  | 1.191257745  |
| C | 3.603004524  | 2.649691423  | -0.352696413 |
| C | 4.028061451  | -0.183602102 | 1.633522736  |
| C | 3.902545991  | -1.559379874 | 2.322935199  |
| C | 5.435497595  | -0.038421986 | 1.031657729  |
| C | 3.879118854  | 0.857444581  | 2.758418326  |
| C | -2.125441797 | -1.071691589 | -1.293355023 |
| C | -1.836912821 | -0.710195323 | -2.621151495 |
| C | -1.345010287 | -1.634223324 | -3.538192777 |
| C | -1.095299577 | -2.944780410 | -3.137873499 |
| C | -1.329137517 | -3.321551746 | -1.817100752 |
| C | -1.841116333 | -2.396869380 | -0.912361808 |
| C | -3.534647974 | -0.532232913 | 0.984467143  |
| C | -4.347543212 | -1.677462107 | 0.929381786  |
| C | -5.094948060 | -2.093964909 | 2.028093131  |
| C | -5.024747815 | -1.385376004 | 3.223687577  |
| C | -4.226582526 | -0.245659355 | 3.305922842  |
| C | -3.511897808 | 0.183738017  | 2.193823657  |
| C | -2.681934188 | 1.504394372  | -0.588883983 |
| C | -1.896128950 | 2.412372038  | 0.134760846  |
| C | -1.894308284 | 3.771787904  | -0.166087775 |
| C | -2.692559920 | 4.264154458  | -1.194689474 |
| C | -3.492751428 | 3.384263739  | -1.918350298 |
| C | -3.482624890 | 2.023949357  | -1.619249229 |
| H | 1.917122804  | -1.807201025 | -2.863062310 |
| H | 1.200901547  | -0.296053704 | -2.320196242 |
| H | 0.972474378  | -1.769046072 | -1.376273736 |
| H | 2.864814235  | -2.885800379 | -0.171480056 |
| H | 4.542943110  | -2.339819374 | -0.420297381 |
| H | 3.599260295  | -2.940822251 | -1.777943146 |
| H | 4.956062911  | -0.027159106 | -1.648477061 |
| H | 3.608796123  | 0.648445754  | -2.580649250 |
| H | 4.238666330  | -0.947937599 | -2.975689856 |
| H | 1.041393332  | 3.002661155  | -1.304190721 |
| H | 0.441959919  | 1.370166557  | -1.035344252 |
| H | 1.806759511  | 1.657140588  | -2.144496767 |
| H | 1.210208198  | 3.480472378  | 0.853867286  |
| H | 2.329084050  | 2.758556589  | 2.002543370  |
| H | 0.825582484  | 1.917535641  | 1.588616025  |
| H | 4.148741028  | 2.237091254  | -1.204271970 |
| H | 4.290672782  | 2.713137851  | 0.494995302  |
| H | 3.313534783  | 3.676927196  | -0.610534217 |

|   |              |              |              |
|---|--------------|--------------|--------------|
| H | 4.704974303  | -1.646757416 | 3.066713343  |
| H | 3.995975439  | -2.402113238 | 1.639587247  |
| H | 2.946127150  | -1.661547564 | 2.842726366  |
| H | 5.570457945  | 0.914323329  | 0.512636757  |
| H | 5.677079014  | -0.843187658 | 0.333888304  |
| H | 6.174304995  | -0.081510667 | 1.842664144  |
| H | 4.575385418  | 0.595356564  | 3.564445571  |
| H | 2.870714305  | 0.864358659  | 3.184678099  |
| H | 4.131763289  | 1.868753454  | 2.433017651  |
| H | -0.704771063 | -3.667029856 | -3.849618951 |
| H | -1.109584001 | -4.333763914 | -1.490344707 |
| H | -2.005545084 | -2.701436022 | 0.117070470  |
| H | -1.147096194 | -1.330447008 | -4.562374315 |
| H | -2.005768079 | 0.313872901  | -2.942697135 |
| H | -4.117370532 | 1.354905653  | -2.197573442 |
| H | -4.126284529 | 3.756164514  | -2.718935228 |
| H | -2.695146299 | 5.325083174  | -1.428059939 |
| H | -1.268689369 | 4.448968795  | 0.410008018  |
| H | -1.260538318 | 2.045812416  | 0.933271925  |
| H | -4.172493614 | 0.314919413  | 4.234866913  |
| H | -5.595762977 | -1.714610867 | 4.087426210  |
| H | -5.725525010 | -2.975395003 | 1.952531296  |
| H | -4.409021133 | -2.246187420 | 0.005095233  |
| H | -2.912125919 | 1.085902574  | 2.268400895  |

#### 4\_ 'Bu<sub>3</sub>P/BPh<sub>3</sub>

Total number of atoms = 77

|   |              |              |              |
|---|--------------|--------------|--------------|
| B | -1.889991909 | 0.168692074  | -0.041874099 |
| C | 0.562251864  | -0.142755030 | -0.730455330 |
| O | 0.532593033  | 0.219560712  | -1.887881991 |
| P | 2.302403454  | -0.339348547 | 0.021244600  |
| C | 3.186448778  | 1.247868138  | -0.540977076 |
| O | -0.359768834 | -0.400217373 | 0.104826449  |
| C | 2.242986815  | 2.454537550  | -0.332005823 |
| C | 3.510344658  | 1.197555687  | -2.047554075 |
| C | 4.500678331  | 1.481438055  | 0.224948708  |
| C | 2.236863125  | -0.480289189 | 1.916342416  |
| C | 1.861113710  | 0.885605618  | 2.523121540  |
| C | 1.146112396  | -1.462068880 | 2.401129117  |
| C | 3.594396730  | -0.938948517 | 2.484114221  |
| C | 3.017230150  | -1.899556937 | -0.787678313 |
| C | 2.598091813  | -1.979487996 | -2.271679786 |
| C | 4.552263986  | -1.943422451 | -0.687034156 |
| C | 2.432769790  | -3.154450312 | -0.112108242 |



|   |              |              |              |
|---|--------------|--------------|--------------|
| C | -1.631413257 | 1.772840858  | -0.073798916 |
| C | -1.296094414 | 2.469196208  | 1.099445885  |
| C | -0.910143630 | 3.808347674  | 1.084665019  |
| C | -0.850201042 | 4.500759824  | -0.123027131 |
| C | -1.183487141 | 3.839918295  | -1.302876701 |
| C | -1.563931531 | 2.498211168  | -1.272806213 |
| C | -2.568568557 | -0.488682739 | -1.349859104 |
| C | -3.729516960 | 0.070273169  | -1.902784102 |
| C | -4.388700377 | -0.516344193 | -2.981117423 |
| C | -3.902622848 | -1.695388470 | -3.540446701 |
| C | -2.759602137 | -2.280522562 | -3.002474991 |
| C | -2.112032615 | -1.682532940 | -1.924186888 |
| C | -2.601672516 | -0.410739031 | 1.292528518  |
| C | -2.367265398 | -1.730160458 | 1.710229133  |
| C | -2.999264998 | -2.279685404 | 2.821306509  |
| C | -3.911802831 | -1.518841730 | 3.549511910  |
| C | -4.184099678 | -0.215373110 | 3.145106116  |
| C | -3.536721020 | 0.324334029  | 2.033381456  |
| H | 2.769720832  | 3.346750456  | -0.689951874 |
| H | 1.977121347  | 2.631541689  | 0.708173009  |
| H | 1.318807326  | 2.366829304  | -0.907731181 |
| H | 2.613867606  | 1.031111455  | -2.646747215 |
| H | 4.266790109  | 0.449916087  | -2.297141434 |
| H | 3.923469464  | 2.174965366  | -2.321645700 |
| H | 5.205429110  | 0.650989010  | 0.124708852  |
| H | 4.343500681  | 1.679229727  | 1.286893174  |
| H | 4.981030064  | 2.370245781  | -0.199527608 |
| H | 1.677544092  | 0.728067821  | 3.591862221  |
| H | 0.939864570  | 1.286089709  | 2.090609514  |
| H | 2.654434802  | 1.630690591  | 2.438394809  |
| H | 1.277639107  | -1.571007395 | 3.484315558  |
| H | 1.214665244  | -2.457232632 | 1.966223063  |
| H | 0.145198674  | -1.077124548 | 2.213870448  |
| H | 4.440225246  | -0.337887951 | 2.143192579  |
| H | 3.800089825  | -1.988927577 | 2.259990478  |
| H | 3.547830096  | -0.847290219 | 3.575329234  |
| H | 3.071091711  | -2.874115352 | -2.693511147 |
| H | 2.913057053  | -1.124519260 | -2.866382536 |
| H | 1.517043740  | -2.082906232 | -2.386982650 |
| H | 4.915078607  | -1.870158498 | 0.340896364  |
| H | 5.029830968  | -1.158913373 | -1.278170284 |
| H | 4.894028041  | -2.904492488 | -1.088701110 |
| H | 2.745385733  | -4.024667273 | -0.700408094 |
| H | 1.338212707  | -3.144941785 | -0.100844370 |
| H | 2.800132946  | -3.303001203 | 0.905109193  |
| H | -0.555159622 | 5.546734887  | -0.143163162 |
| H | -1.140649654 | 4.367419132  | -2.252543159 |

|   |              |              |              |
|---|--------------|--------------|--------------|
| H | -1.794915593 | 1.993107096  | -2.206738635 |
| H | -0.664874662 | 4.313752567  | 2.016019190  |
| H | -1.346040584 | 1.946841855  | 2.053312326  |
| H | -3.762177463 | 1.347326854  | 1.739121139  |
| H | -4.900429453 | 0.387056730  | 3.698404924  |
| H | -4.410582978 | -1.941384373 | 4.417646433  |
| H | -2.788587839 | -3.305332116 | 3.115136885  |
| H | -1.675245406 | -2.347628000 | 1.139497641  |
| H | -2.370150530 | -3.203571813 | -3.425678460 |
| H | -4.410685580 | -2.154997628 | -4.383935228 |
| H | -5.284532616 | -0.051656046 | -3.385533013 |
| H | -4.128958413 | 0.989666508  | -1.477772319 |
| H | -1.223252284 | -2.164373666 | -1.518209448 |

### 1PB<sup>b</sup>

Total number of atoms = 53

|   |              |              |              |
|---|--------------|--------------|--------------|
| C | -0.306341470 | -0.280606763 | -1.194271879 |
| B | 1.072843004  | 0.154006687  | -0.572141447 |
| C | 2.221319011  | -0.880315642 | -0.293803692 |
| C | 3.335088744  | -0.544277351 | 0.496530578  |
| C | 2.204029709  | -2.169136830 | -0.856746665 |
| C | 4.356544243  | -1.456378920 | 0.743236336  |
| C | 3.226049633  | -3.083706597 | -0.629072319 |
| C | 4.302169152  | -2.729608517 | 0.181347656  |
| C | 1.267965090  | 1.678429490  | -0.220942073 |
| C | 1.298597744  | 2.635609393  | -1.244742771 |
| C | 1.361345891  | 2.136751732  | 1.101628926  |
| C | 1.427584955  | 3.993247865  | -0.965164057 |
| C | 1.468137731  | 3.495287783  | 1.389696998  |
| C | 1.505839502  | 4.427459433  | 0.355950496  |
| P | -1.396909533 | -0.346578084 | 0.352667582  |
| C | -2.051371728 | -2.135898604 | 0.302610516  |
| C | -3.290146911 | -2.260160624 | 1.202900380  |
| C | -2.381624436 | -2.724149373 | -1.077191066 |
| C | -0.924936281 | -2.974408147 | 0.936870661  |
| C | -2.788815321 | 0.881736578  | -0.067577057 |
| C | -3.655298552 | 1.080321518  | 1.189564919  |
| C | -3.673944987 | 0.491342531  | -1.256120934 |
| C | -2.122486756 | 2.239221969  | -0.363603391 |
| H | -0.308828363 | -1.248924052 | -1.696472399 |
| H | -0.717327433 | 0.457345068  | -1.890123410 |
| H | -4.181352725 | -1.827579790 | 0.737908381  |
| H | -3.499745835 | -3.322240110 | 1.384590276  |
| H | -3.137008956 | -1.781012574 | 2.176513193  |
| H | -3.097463860 | -2.116541383 | -1.635510986 |
| H | -1.488880797 | -2.850027077 | -1.697540310 |

|   |              |              |              |
|---|--------------|--------------|--------------|
| H | -2.820089550 | -3.722647327 | -0.948020670 |
| H | 0.019491341  | -2.879930086 | 0.392286694  |
| H | -0.740041795 | -2.673168758 | 1.973261244  |
| H | -1.207145862 | -4.035934287 | 0.933174307  |
| H | -4.382047547 | 1.882710794  | 1.006928002  |
| H | -4.219999992 | 0.186388941  | 1.462317096  |
| H | -3.041188485 | 1.371035624  | 2.049004571  |
| H | -4.288999673 | -0.387095582 | -1.036237370 |
| H | -4.358186978 | 1.315733998  | -1.498180781 |
| H | -3.081853747 | 0.280019640  | -2.154135192 |
| H | -1.430480691 | 2.541412294  | 0.429446873  |
| H | -1.566917894 | 2.242608628  | -1.305242302 |
| H | -2.903159014 | 3.006520808  | -0.443726100 |
| H | 1.211140846  | 2.316349850  | -2.282062012 |
| H | 1.453983865  | 4.714724829  | -1.777027156 |
| H | 1.594666089  | 5.487111086  | 0.577547921  |
| H | 1.522116690  | 3.826198783  | 2.423205080  |
| H | 1.317800249  | 1.420377369  | 1.918506252  |
| H | 3.403113733  | 0.451757153  | 0.924499091  |
| H | 5.199435234  | -1.171768236 | 1.366552945  |
| H | 5.100205312  | -3.442755388 | 0.368347133  |
| H | 3.183949988  | -4.070671233 | -1.080505482 |
| H | 1.376014069  | -2.465926677 | -1.495220708 |

### TS14\_PB<sup>b</sup>

Total number of atoms = 56

|   |              |              |              |
|---|--------------|--------------|--------------|
| C | 0.653961435  | -0.046008267 | 2.268886324  |
| O | -0.446028739 | -0.488263488 | 2.131242862  |
| C | 0.192589511  | -0.301041896 | -1.238687716 |
| O | 1.524852937  | 0.425138019  | 2.928143837  |
| B | -1.230760258 | 0.059966703  | -0.619373076 |
| P | 1.552296400  | -0.287834746 | 0.037824111  |
| C | 2.308452185  | -2.014979342 | -0.102754759 |
| C | 3.631807596  | -2.068115221 | 0.676225054  |
| C | 1.301173100  | -2.955983034 | 0.588435950  |
| C | 2.547250154  | -2.517794617 | -1.534926874 |
| C | 2.745084621  | 1.074521230  | -0.488617258 |
| C | 3.430776112  | 0.834589812  | -1.838499378 |
| C | 1.908166086  | 2.366043174  | -0.560903685 |
| C | 3.806519357  | 1.277821620  | 0.609471651  |
| C | -2.344866897 | -1.023005617 | -0.437858798 |
| C | -3.546835778 | -0.714667324 | 0.224233262  |
| C | -2.206212167 | -2.331820948 | -0.933142620 |
| C | -4.541781048 | -1.667947378 | 0.410823523  |
| C | -3.200495226 | -3.289051351 | -0.765259142 |
| C | -4.369411108 | -2.958525317 | -0.084160491 |

|   |              |              |              |
|---|--------------|--------------|--------------|
| C | -1.524128287 | 1.585934706  | -0.354229481 |
| C | -1.811851162 | 2.128881368  | 0.907226568  |
| C | -1.493221292 | 2.468207112  | -1.446528867 |
| C | -2.028931236 | 3.495268664  | 1.072434659  |
| C | -1.736881191 | 3.829495820  | -1.292014041 |
| C | -1.994216055 | 4.349604198  | -0.026064144 |
| H | 0.203158514  | -1.274700439 | -1.731995379 |
| H | 0.456457345  | 0.441246991  | -2.001857149 |
| H | 3.548227026  | -1.601987449 | 1.664026107  |
| H | 3.917546994  | -3.116915491 | 0.824271877  |
| H | 4.445238229  | -1.582659815 | 0.128384614  |
| H | 0.295068836  | -2.880054771 | 0.164141269  |
| H | 1.638949383  | -3.993189994 | 0.469151291  |
| H | 1.220363740  | -2.749481542 | 1.659723126  |
| H | 3.197480626  | -1.856832917 | -2.112213308 |
| H | 3.030372223  | -3.502006268 | -1.487436572 |
| H | 1.614324248  | -2.648034612 | -2.091877110 |
| H | 3.966719635  | 1.743130872  | -2.141930587 |
| H | 4.167288005  | 0.027079251  | -1.779891152 |
| H | 2.714099080  | 0.592672943  | -2.631646805 |
| H | 1.347897238  | 2.546904093  | 0.362903249  |
| H | 2.584805718  | 3.215474597  | -0.714884022 |
| H | 1.193103621  | 2.362598168  | -1.386919465 |
| H | 4.510388131  | 0.445626007  | 0.674444786  |
| H | 4.387564731  | 2.177976563  | 0.371955137  |
| H | 3.347879889  | 1.417054709  | 1.592356586  |
| H | -3.701042993 | 0.290540763  | 0.604911754  |
| H | -1.306722976 | -2.615006443 | -1.473214020 |
| H | -5.455159378 | -1.404279466 | 0.936005129  |
| H | -3.064859562 | -4.290477510 | -1.163440265 |
| H | -5.147540496 | -3.704006914 | 0.054225807  |
| H | -1.846721783 | 1.475767516  | 1.774167950  |
| H | -1.275868015 | 2.085444879  | -2.442918834 |
| H | -2.228378037 | 3.892263859  | 2.063733308  |
| H | -1.715354456 | 4.486118613  | -2.157397039 |
| H | -2.168215967 | 5.413860818  | 0.103091399  |

#### 4PB<sup>b</sup>

Total number of atoms = 56

|   |              |              |              |
|---|--------------|--------------|--------------|
| C | -0.939689450 | 0.037482772  | 1.580606375  |
| O | 0.342964500  | 0.047885136  | 1.494619219  |
| C | -0.143798069 | 0.086903082  | -1.074585129 |
| O | -1.629668359 | 0.055481463  | 2.580697156  |
| B | 1.069290136  | 0.033042155  | 0.110596968  |
| P | -1.666403144 | -0.004191254 | -0.151102680 |
| C | -2.674874576 | 1.546761045  | -0.350383294 |

|   |              |              |              |
|---|--------------|--------------|--------------|
| C | -3.991921636 | 1.476300884  | 0.435743926  |
| C | -1.801581498 | 2.685513309  | 0.217940374  |
| C | -2.954134799 | 1.806022458  | -1.839594579 |
| C | -2.507297116 | -1.655734935 | -0.331845164 |
| C | -3.107239982 | -1.787328529 | -1.739247152 |
| C | -1.407062958 | -2.718250198 | -0.125171488 |
| C | -3.594013309 | -1.858353237 | 0.737431878  |
| C | 1.940814127  | 1.390388823  | 0.028090778  |
| C | 2.721530937  | 1.666420956  | -1.105158510 |
| C | 1.907913780  | 2.370193657  | 1.028973871  |
| C | 3.421513133  | 2.861364747  | -1.242948374 |
| C | 2.605543075  | 3.571786166  | 0.902405686  |
| C | 3.362431823  | 3.824607003  | -0.236650207 |
| C | 1.908545760  | -1.343181652 | 0.036990689  |
| C | 2.275101974  | -2.033852625 | 1.201529404  |
| C | 2.317353196  | -1.901829213 | -1.182787299 |
| C | 2.999088766  | -3.223043627 | 1.152550877  |
| C | 3.046816753  | -3.087525271 | -1.245321468 |
| C | 3.387880156  | -3.757204405 | -0.073168532 |
| H | -0.103168586 | 1.025561568  | -1.632906705 |
| H | -0.077435356 | -0.733453149 | -1.793767845 |
| H | -3.834271198 | 1.159104676  | 1.471081368  |
| H | -4.440184314 | 2.476376944  | 0.451372622  |
| H | -4.712204120 | 0.803498970  | -0.039369040 |
| H | -0.805611879 | 2.731510098  | -0.235184513 |
| H | -2.303989789 | 3.638312415  | 0.015871301  |
| H | -1.678614453 | 2.595190076  | 1.301445256  |
| H | -3.560555215 | 1.017099329  | -2.293822785 |
| H | -3.510293836 | 2.746109155  | -1.930287203 |
| H | -2.032228517 | 1.910662018  | -2.419634982 |
| H | -3.473858332 | -2.811579272 | -1.872535556 |
| H | -3.957401759 | -1.112967649 | -1.883234203 |
| H | -2.368579419 | -1.593566227 | -2.524892214 |
| H | -0.942943444 | -2.647846643 | 0.863844257  |
| H | -1.872228544 | -3.707230633 | -0.205701968 |
| H | -0.608260264 | -2.662732011 | -0.869299193 |
| H | -4.452445525 | -1.200208388 | 0.589276886  |
| H | -3.954101827 | -2.891086011 | 0.664116161  |
| H | -3.207790767 | -1.700340805 | 1.747897354  |
| H | 2.788198566  | 0.924944139  | -1.900286556 |
| H | 1.329720241  | 2.187203187  | 1.931454123  |
| H | 4.016265784  | 3.041892560  | -2.134865238 |
| H | 2.557250207  | 4.311418738  | 1.697655861  |
| H | 3.904866125  | 4.760307506  | -0.340348935 |
| H | 1.982192154  | -1.630160139 | 2.167479019  |
| H | 2.064262696  | -1.402257380 | -2.117891324 |
| H | 3.260695613  | -3.734070697 | 2.075652945  |

|   |             |              |              |
|---|-------------|--------------|--------------|
| H | 3.347105338 | -3.490363569 | -2.209381001 |
| H | 3.951317319 | -4.685250855 | -0.115129471 |

### 1PB<sup>c</sup>

Total number of atoms = 54

|   |              |              |              |
|---|--------------|--------------|--------------|
| C | 0.302991420  | -0.468767938 | 0.804963774  |
| B | -1.116623114 | 0.089926295  | 0.400945295  |
| C | -2.358909863 | -0.869083109 | 0.373983172  |
| C | -3.655922685 | -0.373298495 | 0.604071437  |
| C | -2.232311341 | -2.250349746 | 0.139765478  |
| C | -4.766383013 | -1.210990703 | 0.607652811  |
| C | -3.339344878 | -3.091807117 | 0.119304631  |
| C | -4.609573062 | -2.572270045 | 0.358105560  |
| C | -1.303069200 | 1.610682690  | 0.070084856  |
| C | -0.597522078 | 2.597512385  | 0.778868411  |
| C | -2.176170307 | 2.040531944  | -0.942532638 |
| C | -0.771510797 | 3.949924197  | 0.508650466  |
| C | -2.328819181 | 3.391103066  | -1.244844817 |
| C | -1.632574091 | 4.348724414  | -0.512389420 |
| P | 1.749315977  | 0.197873454  | -0.141316202 |
| C | 1.769787645  | -1.052374893 | -1.579434835 |
| C | 2.993530185  | -0.777383387 | -2.466459579 |
| C | 1.741690066  | -2.538223193 | -1.199453337 |
| C | 0.503376521  | -0.731677374 | -2.399401344 |
| C | 3.312210766  | 0.003813163  | 0.926348776  |
| C | 4.391286586  | 0.869844886  | 0.242555968  |
| C | 3.889639374  | -1.400737795 | 1.147008923  |
| C | 3.012426916  | 0.670981672  | 2.282698066  |
| C | 0.358946691  | -1.305803441 | 1.856491883  |
| H | -3.792202214 | 0.687957178  | 0.792831825  |
| H | -1.246324386 | -2.669720841 | -0.037767560 |
| H | -5.754220162 | -0.801850076 | 0.799162095  |
| H | -3.212129150 | -4.152598914 | -0.076713977 |
| H | -5.475755635 | -3.228256327 | 0.351237199  |
| H | 0.098177274  | 2.296328015  | 1.558319212  |
| H | -2.737721689 | 1.302726102  | -1.510893232 |
| H | -0.224655673 | 4.693352592  | 1.081539922  |
| H | -2.998846234 | 3.696726248  | -2.043444302 |
| H | -1.759670812 | 5.404274671  | -0.735903668 |
| H | 3.924483155  | -1.093779410 | -1.985016181 |
| H | 3.080086127  | 0.285014183  | -2.721279620 |
| H | 2.904596190  | -1.342914614 | -3.403176568 |
| H | 2.678043869  | -2.867373499 | -0.742929836 |
| H | 1.584754281  | -3.144731188 | -2.101643241 |
| H | 0.932021839  | -2.763617521 | -0.499357300 |
| H | 0.516686392  | -1.305915246 | -3.335072356 |

|   |              |              |              |
|---|--------------|--------------|--------------|
| H | 0.438890116  | 0.332189492  | -2.651804797 |
| H | -0.413131494 | -1.013382353 | -1.867900241 |
| H | 5.298153833  | 0.880559032  | 0.862005499  |
| H | 4.050026663  | 1.903015601  | 0.118373351  |
| H | 4.671253017  | 0.488891809  | -0.743120843 |
| H | 4.718967839  | -1.348635081 | 1.865608984  |
| H | 4.293292880  | -1.815699782 | 0.218153152  |
| H | 3.156883569  | -2.111597621 | 1.538439498  |
| H | 2.561714953  | 1.661337782  | 2.145946029  |
| H | 3.952012975  | 0.807539676  | 2.833478495  |
| H | 2.340717414  | 0.080818738  | 2.909583054  |
| H | 1.283953707  | -1.695052157 | 2.273620114  |
| H | -0.549336839 | -1.625446892 | 2.366512427  |

### TS14\_PB<sup>c</sup>

Total number of atoms = 57

|   |              |              |              |
|---|--------------|--------------|--------------|
| C | -0.177888351 | -0.355410553 | -1.012939247 |
| P | -1.617401068 | -0.211804785 | 0.130551382  |
| C | -2.875326934 | 0.988985447  | -0.613276227 |
| C | -3.728095760 | 0.458832595  | -1.772360059 |
| C | -3.796297817 | 1.446977138  | 0.534940362  |
| C | -2.076567855 | 2.210813895  | -1.095389680 |
| C | -2.305212368 | -1.969994846 | 0.282581826  |
| C | -2.476876233 | -2.718082560 | -1.046393356 |
| C | -3.649643100 | -1.924694654 | 1.026904492  |
| C | -1.306008264 | -2.752336256 | 1.157638146  |
| B | 1.253028651  | 0.026924086  | -0.443515892 |
| C | 1.560725767  | 1.559108025  | -0.231784846 |
| C | 2.107921376  | 2.091514163  | 0.947160397  |
| C | 1.328207531  | 2.445374866  | -1.294564780 |
| C | 2.386331243  | 3.450401874  | 1.064623557  |
| C | 1.629488545  | 3.800811622  | -1.193217680 |
| C | 2.150557230  | 4.308940332  | -0.006773946 |
| C | 2.378317122  | -1.053392034 | -0.344473878 |
| C | 3.689593974  | -0.709125999 | 0.029370983  |
| C | 2.124560669  | -2.406526141 | -0.631842931 |
| C | 4.689962933  | -1.669088733 | 0.137085451  |
| C | 3.118525687  | -3.372901060 | -0.530387402 |
| C | 4.403806930  | -3.004327941 | -0.139243503 |
| C | -0.293876141 | -0.664317518 | -2.313235680 |
| C | -0.592772555 | 0.357162421  | 2.258226504  |
| O | -1.361598144 | 1.022027539  | 2.870101481  |
| O | 0.444093714  | -0.221977442 | 2.127172306  |
| H | -4.383332802 | 1.264630857  | -2.128318233 |
| H | -3.119756886 | 0.135634350  | -2.622286140 |

|   |              |              |              |
|---|--------------|--------------|--------------|
| H | -4.372085880 | -0.371737478 | -1.469646144 |
| H | -3.223597135 | 1.851061204  | 1.374214751  |
| H | -4.461962953 | 2.235466940  | 0.161076841  |
| H | -4.427387491 | 0.639391906  | 0.913871994  |
| H | -2.776844449 | 3.012960522  | -1.359196644 |
| H | -1.400592091 | 2.593628157  | -0.323242462 |
| H | -1.479384324 | 1.976036566  | -1.980193579 |
| H | -2.927087435 | -3.698899276 | -0.846410293 |
| H | -3.130722513 | -2.191992858 | -1.747205270 |
| H | -1.514606054 | -2.889450092 | -1.536257289 |
| H | -4.452953556 | -1.509936808 | 0.411026330  |
| H | -3.938857063 | -2.948513436 | 1.295115050  |
| H | -3.585127840 | -1.343890739 | 1.953628058  |
| H | -0.286295314 | -2.718974123 | 0.764174107  |
| H | -1.276107563 | -2.369615219 | 2.181809598  |
| H | -1.618732900 | -3.803333257 | 1.200781873  |
| H | 2.369978838  | 5.368834205  | 0.084498518  |
| H | 1.444663857  | 4.461756569  | -2.035438584 |
| H | 2.791501942  | 3.839313557  | 1.994452746  |
| H | 2.296679902  | 1.433764838  | 1.790559736  |
| H | 0.902639493  | 2.067265548  | -2.221441786 |
| H | 1.128659821  | -2.703104967 | -0.948623931 |
| H | 2.894107241  | -4.412261030 | -0.752266418 |
| H | 5.183349597  | -3.756485476 | -0.055782084 |
| H | 5.693945896  | -1.377754500 | 0.432042652  |
| H | 3.926856975  | 0.330397725  | 0.235807109  |
| H | -1.243853600 | -0.847310566 | -2.808496277 |
| H | 0.586210718  | -0.737177053 | -2.953026792 |

#### 4PB<sup>c</sup>

Total number of atoms = 57

|   |              |              |              |
|---|--------------|--------------|--------------|
| C | -0.933741050 | -0.057560611 | 1.666445912  |
| O | 0.344763348  | -0.190672943 | 1.594073787  |
| C | -0.110126055 | -0.269473394 | -0.910167369 |
| O | -1.625010718 | 0.064567605  | 2.656982900  |
| B | 1.079593979  | -0.061852715 | 0.216864759  |
| P | -1.674463653 | -0.131872528 | -0.063971313 |
| C | -2.560300696 | 1.473486318  | -0.408934702 |
| C | -3.937597648 | 1.502248755  | 0.266747054  |
| C | -1.677294707 | 2.595879790  | 0.169377688  |
| C | -2.693697237 | 1.665315606  | -1.927630941 |
| C | -2.667372126 | -1.714928373 | -0.139367309 |
| C | -3.327027505 | -1.860419731 | -1.518211544 |
| C | -1.656386818 | -2.857196510 | 0.083549872  |
| C | -3.732406891 | -1.775758740 | 0.969547944  |



|   |              |              |              |
|---|--------------|--------------|--------------|
| C | 1.694848942  | 1.435755379  | 0.149577572  |
| C | 1.906932299  | 2.114195997  | -1.058231263 |
| C | 2.065037253  | 2.104435512  | 1.326285131  |
| C | 2.463142232  | 3.392088193  | -1.099130014 |
| C | 2.614219985  | 3.384104568  | 1.298907244  |
| C | 2.816607152  | 4.034577695  | 0.083751272  |
| C | 2.164652622  | -1.245934308 | 0.106221003  |
| C | 3.234693670  | -1.152111189 | -0.794661868 |
| C | 2.042150591  | -2.441685412 | 0.827587583  |
| C | 4.126584583  | -2.205181066 | -0.986529203 |
| C | 2.933846851  | -3.497450488 | 0.651584700  |
| C | 3.977039798  | -3.386120521 | -0.264308410 |
| C | 0.028876664  | -0.533751883 | -2.213079667 |
| H | -4.350406435 | 2.512453353  | 0.163057708  |
| H | -3.872638240 | 1.272298652  | 1.334752069  |
| H | -4.641101380 | 0.811316428  | -0.207649730 |
| H | -2.141549463 | 3.556862338  | -0.080617893 |
| H | -0.666470015 | 2.590582484  | -0.249300192 |
| H | -1.600417534 | 2.533787161  | 1.259061359  |
| H | -3.195261035 | 2.622088376  | -2.112726155 |
| H | -3.291409199 | 0.880403348  | -2.401887169 |
| H | -1.713791838 | 1.701430618  | -2.412268140 |
| H | -4.085820899 | -1.091010545 | -1.693103881 |
| H | -3.828589208 | -2.833942859 | -1.565232053 |
| H | -2.595507852 | -1.829443853 | -2.331813990 |
| H | -2.197737964 | -3.808909777 | 0.035901315  |
| H | -1.184673117 | -2.793402783 | 1.069550655  |
| H | -0.865730635 | -2.871222897 | -0.670330440 |
| H | -4.540799340 | -1.058530750 | 0.815957940  |
| H | -3.303934856 | -1.603984896 | 1.960034121  |
| H | -4.174811192 | -2.778715047 | 0.955236845  |
| H | 1.619581076  | 1.641793275  | -1.995974193 |
| H | 1.914770019  | 1.611668186  | 2.283496981  |
| H | 2.615343158  | 3.886761011  | -2.055145532 |
| H | 2.885908950  | 3.875136580  | 2.229760284  |
| H | 3.247246246  | 5.031758611  | 0.059230318  |
| H | 3.386162601  | -0.225614381 | -1.345711706 |
| H | 1.242860451  | -2.541189077 | 1.558855639  |
| H | 4.945724575  | -2.099535402 | -1.693413497 |
| H | 2.816191923  | -4.409093387 | 1.232190486  |
| H | 4.675027166  | -4.207059122 | -0.404165988 |
| H | -0.797255819 | -0.629556305 | -2.915307484 |
| H | 1.023962268  | -0.678028701 | -2.631629374 |

### 1PB<sup>d</sup>

Total number of atoms = 67

|   |              |              |              |
|---|--------------|--------------|--------------|
| C | 0.228501111  | -1.198776298 | -1.070768551 |
| B | 1.776407622  | -1.046808750 | -0.730843714 |
| C | 2.509100974  | 0.326109734  | -0.924130439 |
| C | 2.042353948  | 1.300022347  | -1.823066979 |
| C | 3.619492732  | 0.669296174  | -0.129974536 |
| C | 2.652965118  | 2.543392628  | -1.936825444 |
| C | 4.224632625  | 1.917910468  | -0.220825262 |
| C | 3.745356270  | 2.856066505  | -1.131652248 |
| C | 2.554098593  | -2.295273074 | -0.183933729 |
| C | 3.909843299  | -2.509644667 | -0.490599340 |
| C | 1.910284244  | -3.267811901 | 0.603255885  |
| C | 4.589206209  | -3.637269894 | -0.038664029 |
| C | 2.589772484  | -4.382124458 | 1.082158032  |
| C | 3.931464995  | -4.571538597 | 0.757189860  |
| P | -0.789631199 | -0.785213926 | 0.448244210  |
| C | -2.609331660 | -0.843900644 | 0.083365552  |
| C | -3.415519515 | -0.289342168 | 1.107333671  |
| C | -3.252152569 | -1.444409027 | -1.022651237 |
| C | -4.804136178 | -0.267481281 | 0.966431663  |
| C | -4.643850576 | -1.402797960 | -1.112547249 |
| C | -5.442786956 | -0.802409442 | -0.144478846 |
| C | -0.414748045 | 1.028993292  | 0.524907358  |
| C | -0.924332791 | 1.995373313  | -0.366928940 |
| C | 0.536335701  | 1.422192832  | 1.492214739  |
| C | -0.461168523 | 3.310073140  | -0.282348532 |
| C | 0.979685923  | 2.742416569  | 1.527736005  |
| C | 0.501757651  | 3.701277752  | 0.640350404  |
| C | 1.121751495  | 0.452524731  | 2.494761415  |
| C | 1.054979369  | 5.101831346  | 0.648608576  |
| C | -1.953500256 | 1.700727585  | -1.433823407 |
| C | -2.531392635 | -2.157009829 | -2.144953431 |
| C | -6.940496457 | -0.737219731 | -0.300504513 |
| C | -2.842056820 | 0.299064478  | 2.376621708  |
| H | -0.055582763 | -0.564146953 | -1.916214191 |
| H | 0.022395671  | -2.240619218 | -1.329265715 |
| H | 1.174274789  | 1.088900959  | -2.441426412 |
| H | 3.996666555  | -0.049026890 | 0.592963080  |
| H | 2.267164933  | 3.275294866  | -2.640453781 |
| H | 5.069666343  | 2.160091470  | 0.417461039  |
| H | 4.220332384  | 3.830160467  | -1.212625251 |
| H | 4.437868889  | -1.785931607 | -1.106412008 |
| H | 0.863031790  | -3.134366400 | 0.864203182  |
| H | 5.632987881  | -3.784632374 | -0.301118721 |
| H | 2.071948325  | -5.107302660 | 1.703463595  |
| H | 4.461388156  | -5.447495890 | 1.120856154  |
| H | -5.400903072 | 0.176401903  | 1.760985685  |
| H | -5.121541543 | -1.860750139 | -1.976632414 |

|   |              |              |              |
|---|--------------|--------------|--------------|
| H | -0.850785967 | 4.047202366  | -0.982127995 |
| H | 1.732199472  | 3.025947319  | 2.260452804  |
| H | 0.343531473  | -0.022061994 | 3.101205745  |
| H | 1.683344386  | -0.357716675 | 2.015727868  |
| H | 1.809846889  | 0.973915729  | 3.166968698  |
| H | 1.208827777  | 5.468202163  | 1.668960455  |
| H | 2.027553974  | 5.125820072  | 0.141070382  |
| H | 0.390915043  | 5.800740958  | 0.130850831  |
| H | -2.004814518 | 2.529064177  | -2.146827517 |
| H | -1.725902832 | 0.791587460  | -1.996761222 |
| H | -2.950866946 | 1.560862871  | -1.004457963 |
| H | -1.864847567 | -1.494690954 | -2.703917386 |
| H | -1.932999701 | -2.996584161 | -1.777915766 |
| H | -3.256506362 | -2.563050733 | -2.855837774 |
| H | -7.435868149 | -0.591296771 | 0.664380655  |
| H | -7.231047174 | 0.096966298  | -0.950831568 |
| H | -7.335601437 | -1.654146288 | -0.750099386 |
| H | -2.067675629 | -0.347286604 | 2.805544755  |
| H | -2.384102223 | 1.278932124  | 2.204441424  |
| H | -3.629127707 | 0.421684253  | 3.126395158  |

#### TS14\_PB<sup>d</sup>

Total number of atoms = 70

|   |              |              |              |
|---|--------------|--------------|--------------|
| C | 0.572900652  | -0.756759311 | -0.944009074 |
| B | 2.084945775  | -0.527290165 | -0.474193162 |
| C | 3.173358479  | -1.633960456 | -0.687797197 |
| C | 2.857310950  | -3.002911869 | -0.709273158 |
| C | 3.832951394  | -3.975244824 | -0.893153434 |
| C | 5.160227160  | -3.598160200 | -1.088047074 |
| C | 5.503057147  | -2.248845645 | -1.086743817 |
| C | 4.521432552  | -1.283841257 | -0.879522178 |
| C | 2.527707467  | 0.912458414  | -0.015889654 |
| C | 3.359946326  | 1.082906342  | 1.105113466  |
| C | 3.738727370  | 2.348583381  | 1.540018039  |
| C | 3.317429610  | 3.480022350  | 0.842545253  |
| C | 2.517619814  | 3.336508600  | -0.286780887 |
| C | 2.121721629  | 2.066929844  | -0.701397237 |
| C | 0.387423333  | -0.915050768 | 2.341101697  |
| O | 1.423910244  | -1.348106914 | 1.915359951  |
| O | -0.359409995 | -0.730402947 | 3.249160211  |
| P | -0.652288108 | -0.241039414 | 0.348729996  |
| C | -2.205974593 | -1.238696162 | 0.222181764  |
| C | -3.473576926 | -0.652022281 | 0.457753194  |
| C | -2.141480659 | -2.633806038 | 0.001474254  |
| C | -4.622171200 | -1.423520823 | 0.276671989  |

|   |              |              |              |
|---|--------------|--------------|--------------|
| C | -3.321574696 | -3.357739197 | -0.169196971 |
| C | -4.575769780 | -2.766654997 | -0.080101282 |
| C | -1.055208344 | 1.471365033  | -0.194250765 |
| C | -1.585044757 | 1.732048852  | -1.477253937 |
| C | -0.770050052 | 2.543306213  | 0.674326261  |
| C | -1.812633085 | 3.054563756  | -1.856643974 |
| C | -1.017209081 | 3.847573232  | 0.246685262  |
| C | -1.533964079 | 4.127130630  | -1.013408833 |
| C | -0.182995847 | 2.348848631  | 2.049553444  |
| C | -1.800005816 | 5.542403997  | -1.458394238 |
| C | -1.935609195 | 0.669237473  | -2.497387488 |
| C | -0.863411766 | -3.445578404 | 0.007880939  |
| C | -5.831874399 | -3.563307735 | -0.319097526 |
| C | -3.687665949 | 0.755028918  | 0.974915477  |
| H | 0.389088202  | -1.773873399 | -1.285193743 |
| H | 0.420330369  | -0.111456126 | -1.817374617 |
| H | -5.589717077 | -0.955509138 | 0.445581887  |
| H | -3.249493835 | -4.428381370 | -0.351705369 |
| H | -2.228733813 | 3.249102641  | -2.843776470 |
| H | -0.787669603 | 4.669037179  | 0.921218717  |
| H | -0.788722845 | 1.682949614  | 2.671629212  |
| H | 0.822286833  | 1.917772061  | 1.989259514  |
| H | -0.097736446 | 3.309291778  | 2.564781327  |
| H | -2.873163886 | 5.712684636  | -1.602082309 |
| H | -1.440918930 | 6.267660813  | -0.722661886 |
| H | -1.306738894 | 5.754267311  | -2.413404431 |
| H | -1.158160137 | 0.597916727  | -3.268424497 |
| H | -2.071864271 | -0.323131991 | -2.067291922 |
| H | -2.866959482 | 0.936160315  | -3.006605392 |
| H | -0.485112345 | -3.630894390 | -1.004530227 |
| H | -0.063697419 | -2.984485439 | 0.591894878  |
| H | -1.061103217 | -4.423110550 | 0.457606565  |
| H | -6.019875271 | -3.679802627 | -1.393154498 |
| H | -5.752608288 | -4.567600557 | 0.109818232  |
| H | -6.706379450 | -3.073874901 | 0.119796293  |
| H | -2.941890955 | 1.033693738  | 1.723831924  |
| H | -3.658537729 | 1.508957233  | 0.183294670  |
| H | -4.667765916 | 0.814583995  | 1.457070004  |
| H | 2.180280917  | 4.211649135  | -0.834329140 |
| H | 3.613670552  | 4.469602655  | 1.179265616  |
| H | 4.363217974  | 2.453375826  | 2.422583599  |
| H | 3.689680304  | 0.205695338  | 1.655233911  |
| H | 1.470165479  | 1.984363489  | -1.568119682 |
| H | 4.804426643  | -0.234650248 | -0.868718315 |
| H | 6.536067378  | -1.949433309 | -1.239256438 |
| H | 5.925009287  | -4.355075951 | -1.238614896 |
| H | 3.561915015  | -5.027167281 | -0.884463697 |

H 1.830739617 -3.317090233 -0.550538060

#### 4PB<sup>d</sup>

Total number of atoms = 70

|   |              |              |              |
|---|--------------|--------------|--------------|
| C | -0.212734378 | -0.285626530 | 1.751621162  |
| O | -1.482325707 | -0.337254834 | 1.566249930  |
| C | -0.847269391 | -0.536126041 | -0.909536759 |
| O | 0.378206911  | -0.247839261 | 2.807320699  |
| B | -2.110193963 | -0.219193269 | 0.152039964  |
| C | -3.257815091 | -1.342900908 | 0.041827249  |
| C | -3.586772364 | -1.955917442 | -1.175191461 |
| C | -3.999803188 | -1.729179417 | 1.168470029  |
| C | -4.601728531 | -2.906944726 | -1.271893123 |
| C | -5.010284868 | -2.683368777 | 1.086338843  |
| C | -5.316639255 | -3.276801491 | -0.136654211 |
| C | -2.628356356 | 1.303009836  | -0.024421294 |
| C | -2.188343389 | 2.352824518  | 0.793912818  |
| C | -3.460154706 | 1.644096354  | -1.102507280 |
| C | -2.525378268 | 3.680420055  | 0.529435947  |
| C | -3.804328109 | 2.965096044  | -1.375812944 |
| C | -3.327965974 | 3.993033580  | -0.563193064 |
| P | 0.646083550  | -0.225079137 | 0.034666978  |
| C | 1.472361939  | 1.401496476  | 0.016294088  |
| C | 2.535682937  | 1.586688407  | 0.936072795  |
| C | 1.068483374  | 2.466919111  | -0.822154724 |
| C | 3.101631696  | 2.854942306  | 1.053780667  |
| C | 1.673662404  | 3.710953431  | -0.649586792 |
| C | 2.673534006  | 3.935419831  | 0.290640279  |
| C | 1.828956195  | -1.586023952 | -0.232074258 |
| C | 2.881945743  | -1.429303913 | -1.159505062 |
| C | 1.641556363  | -2.824320087 | 0.425955879  |
| C | 3.783689354  | -2.479627763 | -1.330847769 |
| C | 2.574565911  | -3.836758473 | 0.211849382  |
| C | 3.664995562  | -3.680152773 | -0.639506462 |
| C | 0.473587422  | -3.136467529 | 1.333610841  |
| C | 4.664105180  | -4.792965093 | -0.819689807 |
| C | 3.088867052  | -0.197912428 | -2.012347919 |
| C | 0.062848865  | 2.354144693  | -1.940431516 |
| C | 3.304550871  | 5.295035022  | 0.437222307  |
| C | 3.173970123  | 0.476884219  | 1.741102335  |
| H | -0.790064288 | -1.607212193 | -1.140860150 |
| H | -0.913839651 | -0.001437191 | -1.854246146 |
| H | -3.038580060 | -1.688776282 | -2.078673610 |
| H | -3.775509521 | -1.273767632 | 2.129947612  |
| H | -4.828897142 | -3.363052336 | -2.232167913 |

|   |              |              |              |
|---|--------------|--------------|--------------|
| H | -5.561506863 | -2.965176622 | 1.979919037  |
| H | -6.104444688 | -4.022158635 | -0.202937394 |
| H | -1.564270570 | 2.137844076  | 1.658473659  |
| H | -3.843905336 | 0.853988245  | -1.745983580 |
| H | -2.159944327 | 4.469647820  | 1.181432606  |
| H | -4.448170590 | 3.194618689  | -2.221122883 |
| H | -3.590422605 | 5.026189325  | -0.773682407 |
| H | 3.907327232  | 2.996842193  | 1.769836615  |
| H | 1.348563144  | 4.533546843  | -1.281821177 |
| H | 4.597056920  | -2.355646994 | -2.041987022 |
| H | 2.434331931  | -4.787111363 | 0.721790697  |
| H | 0.592405761  | -2.677288533 | 2.319518520  |
| H | -0.487215988 | -2.805391368 | 0.925682002  |
| H | 0.397430842  | -4.216937931 | 1.478601232  |
| H | 5.209353360  | -4.977243966 | 0.112798703  |
| H | 4.165718365  | -5.728298955 | -1.095942665 |
| H | 5.395660939  | -4.554189905 | -1.596505419 |
| H | 2.152024252  | 0.178019746  | -2.434788876 |
| H | 3.546626261  | 0.623339279  | -1.451990461 |
| H | 3.747669953  | -0.439088659 | -2.850872511 |
| H | 0.340043701  | 1.569519376  | -2.653265474 |
| H | -0.945197891 | 2.151224612  | -1.574322816 |
| H | 0.022317167  | 3.294240979  | -2.495279390 |
| H | 3.788540299  | 5.407999812  | 1.411470759  |
| H | 4.067541506  | 5.452788348  | -0.334539646 |
| H | 2.559593424  | 6.089470037  | 0.330192995  |
| H | 2.446061605  | -0.173672683 | 2.226845630  |
| H | 3.817563101  | -0.138576191 | 1.101188074  |
| H | 3.800279831  | 0.905254997  | 2.527840783  |

### 1PB<sup>c</sup>

Total number of atoms = 71

|   |              |              |              |
|---|--------------|--------------|--------------|
| C | 0.851659512  | -1.144873730 | -0.836383775 |
| B | 2.349888829  | -1.202684174 | -0.297355422 |
| P | -0.267238218 | -0.479487238 | 0.505170500  |
| C | 2.729183921  | -2.405920487 | 0.722319482  |
| C | 3.417413276  | -0.170321954 | -0.922409609 |
| C | -2.051575593 | -0.869038166 | 0.158591813  |
| C | -4.862967950 | -1.274833712 | -0.032410813 |
| C | -2.943361766 | -0.275753140 | 1.088046820  |
| C | -2.593870182 | -1.716302709 | -0.836199468 |
| C | -3.977135500 | -1.891606905 | -0.908805622 |
| C | -4.318783728 | -0.475388804 | 0.963788472  |
| C | -0.172522871 | 1.346388756  | 0.190490038  |
| C | 0.084022379  | 4.151405403  | -0.121362416 |

|   |              |              |              |
|---|--------------|--------------|--------------|
| C | 0.563834188  | 2.112670760  | 1.121066724  |
| C | -0.772432841 | 2.003121924  | -0.905755911 |
| C | -0.627850518 | 3.385355781  | -1.038527108 |
| C | 0.676448150  | 3.492628061  | 0.951150228  |
| C | 4.642973497  | 0.188589122  | -0.063124043 |
| C | 2.814403215  | 1.168127339  | -1.393178883 |
| C | 3.897890048  | -0.919051441 | -2.197607643 |
| C | 3.972351607  | -3.204419438 | 0.269394655  |
| C | 1.601742916  | -3.446400682 | 0.893360787  |
| C | 3.005011775  | -1.811597226 | 2.123787626  |
| C | -2.479899283 | 0.591642932  | 2.236961669  |
| C | -1.783174579 | -2.475225126 | -1.863617013 |
| C | 1.300790373  | 1.489272637  | 2.283181623  |
| C | -1.580044082 | 1.295395736  | -1.967326074 |
| C | -6.349352037 | -1.501934773 | -0.135764548 |
| C | 0.192145503  | 5.646784319  | -0.275470897 |
| H | -4.376746485 | -2.536385245 | -1.689273777 |
| H | -4.981828089 | 0.007198208  | 1.679298547  |
| H | -1.086817875 | 3.878089335  | -1.893683607 |
| H | 1.253523558  | 4.066738003  | 1.673235898  |
| H | 5.339699519  | 0.805740828  | -0.646785218 |
| H | 5.199047823  | -0.682557144 | 0.290464702  |
| H | 4.350343839  | 0.776808108  | 0.815108076  |
| H | 1.960544094  | 1.042419084  | -2.065698645 |
| H | 3.575864285  | 1.741791821  | -1.939544964 |
| H | 2.480028773  | 1.785009511  | -0.554868374 |
| H | 3.060440002  | -1.181157392 | -2.857438302 |
| H | 4.448767559  | -1.836112033 | -1.969250273 |
| H | 4.567940538  | -0.264259242 | -2.771059634 |
| H | 3.808738704  | -3.687329064 | -0.701957614 |
| H | 4.178714661  | -4.001359762 | 0.996619899  |
| H | 4.876554754  | -2.596314434 | 0.191923708  |
| H | 1.379878707  | -3.967416529 | -0.046952579 |
| H | 0.674127121  | -2.997577865 | 1.264827790  |
| H | 1.906962192  | -4.210885189 | 1.620104448  |
| H | 3.804182025  | -1.064547578 | 2.117771238  |
| H | 3.309095385  | -2.613284368 | 2.811167446  |
| H | 2.103288955  | -1.348636213 | 2.538975709  |
| H | -3.293448748 | 0.737101962  | 2.953554117  |
| H | -2.148402093 | 1.579515085  | 1.899566875  |
| H | -1.639500489 | 0.133969338  | 2.770751944  |
| H | -2.452308614 | -2.996626696 | -2.553663223 |
| H | -1.147722354 | -3.236550478 | -1.398448073 |
| H | -1.141034890 | -1.824573054 | -2.462386054 |
| H | 2.135753027  | 0.869960352  | 1.934403438  |
| H | 0.658087883  | 0.842736762  | 2.887149659  |
| H | 1.718429620  | 2.264438735  | 2.932665908  |

|   |              |              |              |
|---|--------------|--------------|--------------|
| H | -1.684595106 | 1.932842170  | -2.850273742 |
| H | -2.583943245 | 1.048093343  | -1.607354769 |
| H | -1.117300735 | 0.359029465  | -2.285856290 |
| H | -6.910895672 | -0.661779665 | 0.284482326  |
| H | -6.646600177 | -2.404650579 | 0.411924603  |
| H | -6.660868905 | -1.633386484 | -1.177038225 |
| H | -0.667220324 | 6.148365267  | 0.185948599  |
| H | 0.214240243  | 5.937696781  | -1.330576942 |
| H | 1.096335409  | 6.034093251  | 0.204174928  |
| H | 0.540002628  | -2.176410141 | -1.003084420 |
| H | 0.736375233  | -0.596395529 | -1.774882217 |

### TS14\_PB<sup>e</sup>

Total number of atoms = 74

|   |              |              |              |
|---|--------------|--------------|--------------|
| C | 1.057240273  | -0.481360600 | -0.911846347 |
| P | -0.286544846 | -0.108591650 | 0.305317798  |
| C | -0.725426217 | 1.657443653  | -0.042271256 |
| C | -1.293798966 | 2.059359898  | -1.275443705 |
| C | -0.456216528 | 2.638447856  | 0.937401019  |
| C | -1.556594905 | 3.409438997  | -1.499693518 |
| C | -0.737803979 | 3.978568024  | 0.660786167  |
| C | -1.283975885 | 4.388506322  | -0.547999874 |
| C | -1.843781364 | -1.077701039 | -0.005426233 |
| C | -2.867431222 | -0.818594443 | 0.945188038  |
| C | -2.092517367 | -2.054073002 | -1.002231567 |
| C | -4.084243210 | -1.492499357 | 0.867022129  |
| C | -3.329205190 | -2.707240533 | -1.023314577 |
| C | -4.340081663 | -2.447818383 | -0.108595204 |
| C | 3.553208148  | 0.600025233  | -0.428977828 |
| C | 3.028562470  | -2.229013991 | -0.261807004 |
| B | 2.562209157  | -0.675500992 | -0.342113215 |
| C | 0.979499234  | -0.724318808 | 2.380653799  |
| C | -1.138961141 | -2.478224152 | -2.099380888 |
| C | -5.652012746 | -3.186989697 | -0.152496257 |
| C | -2.715531456 | 0.179068485  | 2.068664920  |
| C | 0.128484629  | 2.335804450  | 2.298024048  |
| C | -1.581320933 | 5.838687024  | -0.828836214 |
| C | -1.648879924 | 1.098005238  | -2.384009670 |
| C | 4.258850771  | 0.493640833  | -1.803888223 |
| C | 4.638647247  | 0.701625651  | 0.661094756  |
| C | 2.796062834  | 1.941775821  | -0.406013967 |
| C | 3.101119166  | -2.745333869 | -1.724879102 |
| C | 4.398721968  | -2.495086240 | 0.381482060  |
| C | 2.008013944  | -3.118972937 | 0.482208723  |
| O | 2.065448391  | -0.459185106 | 1.963545364  |



|   |              |              |              |
|---|--------------|--------------|--------------|
| O | 0.208277451  | -1.113784174 | 3.184371075  |
| H | -1.991729008 | 3.705894536  | -2.452029928 |
| H | -0.518865297 | 4.724461035  | 1.421324119  |
| H | -4.852296413 | -1.264950056 | 1.603049597  |
| H | -3.505555553 | -3.450011929 | -1.798177589 |
| H | -0.768766925 | -1.636072845 | -2.688163422 |
| H | -0.277213919 | -3.029240504 | -1.708169132 |
| H | -1.652952486 | -3.151044450 | -2.790706510 |
| H | -6.493282360 | -2.513184829 | 0.040208824  |
| H | -5.811197178 | -3.662347089 | -1.125037896 |
| H | -5.680726578 | -3.973259130 | 0.611044085  |
| H | -3.577210405 | 0.126517727  | 2.739668531  |
| H | -1.823443398 | -0.033089350 | 2.664603361  |
| H | -2.646575079 | 1.206644964  | 1.697011382  |
| H | -0.491615518 | 1.637892966  | 2.866713552  |
| H | 1.131170628  | 1.905854154  | 2.229802237  |
| H | 0.209530567  | 3.255080775  | 2.884458968  |
| H | -1.064152388 | 6.177834447  | -1.733224033 |
| H | -2.654071178 | 5.995686273  | -0.988832604 |
| H | -1.267212653 | 6.479829781  | -0.000141198 |
| H | -0.784966662 | 0.512095361  | -2.710870507 |
| H | -2.423876939 | 0.391375507  | -2.073748713 |
| H | -2.019871514 | 1.643780647  | -3.255669442 |
| H | 4.953394266  | -0.352289532 | -1.843980419 |
| H | 3.544754821  | 0.387512550  | -2.631794017 |
| H | 4.841098810  | 1.405957528  | -1.992037561 |
| H | 5.348435226  | -0.126641876 | 0.637607463  |
| H | 5.215319116  | 1.625915685  | 0.517599724  |
| H | 4.195528281  | 0.738318937  | 1.660982286  |
| H | 2.049921894  | 2.037366841  | -1.201451626 |
| H | 2.283250882  | 2.090286616  | 0.547763548  |
| H | 3.503082862  | 2.773722712  | -0.526282075 |
| H | 2.126441332  | -2.739333065 | -2.226377473 |
| H | 3.793780876  | -2.163860724 | -2.341900923 |
| H | 3.456490754  | -3.784528211 | -1.725607054 |
| H | 4.585234545  | -3.576827551 | 0.435763451  |
| H | 5.217540723  | -2.056214988 | -0.198411970 |
| H | 4.448289766  | -2.097654654 | 1.400349215  |
| H | 2.088776895  | -2.995148234 | 1.566380822  |
| H | 0.965710903  | -2.921891192 | 0.203559592  |
| H | 2.203510163  | -4.178154591 | 0.266091274  |
| H | 1.051067772  | 0.299889946  | -1.677450211 |
| H | 0.786802690  | -1.405062685 | -1.408935541 |

#### 4PB<sup>c</sup>

Total number of atoms = 74

|   |              |              |              |
|---|--------------|--------------|--------------|
| C | 1.100852988  | -0.439940753 | -1.034175310 |
| P | -0.267692315 | -0.076319870 | 0.067840881  |
| C | -0.677207461 | 1.703708069  | -0.073902023 |
| C | -1.299071384 | 2.104710208  | -1.282370849 |
| C | -0.364293939 | 2.670303153  | 0.908799504  |
| C | -1.593657769 | 3.451078294  | -1.478952764 |
| C | -0.681427954 | 4.005304755  | 0.649133202  |
| C | -1.294625165 | 4.420239955  | -0.526390252 |
| C | -1.812917470 | -1.066773608 | -0.007689230 |
| C | -2.813573539 | -0.768951766 | 0.952353671  |
| C | -2.048616086 | -2.094826425 | -0.957332650 |
| C | -3.986252515 | -1.523376422 | 0.970197483  |
| C | -3.243322504 | -2.811045280 | -0.882881177 |
| C | -4.218986846 | -2.558113845 | 0.074529641  |
| C | 3.595307481  | 0.516142549  | -0.277055951 |
| C | 2.888121974  | -2.286470141 | -0.119121662 |
| B | 2.463226355  | -0.673493998 | -0.051096615 |
| C | 0.666770497  | -0.507682992 | 1.683344063  |
| C | -1.135380671 | -2.487241572 | -2.097982437 |
| C | -5.475403415 | -3.385355717 | 0.135817234  |
| C | -2.712879650 | 0.348214875  | 1.962636233  |
| C | 0.286595998  | 2.383572607  | 2.241507574  |
| C | -1.640274855 | 5.867214321  | -0.760983921 |
| C | -1.665982908 | 1.148355932  | -2.393677861 |
| C | 4.447845140  | 0.266719882  | -1.533105034 |
| C | 4.542703245  | 0.653441434  | 0.932593657  |
| C | 2.947928923  | 1.905455282  | -0.456986492 |
| C | 3.098418829  | -2.806110932 | -1.556297598 |
| C | 4.167493743  | -2.609121608 | 0.674089782  |
| C | 1.772105874  | -3.149461644 | 0.511972022  |
| O | 1.921774264  | -0.483668082 | 1.422478318  |
| O | 0.117651002  | -0.759278104 | 2.732478963  |
| H | -2.067242434 | 3.750988608  | -2.410849797 |
| H | -0.431042139 | 4.748848299  | 1.401455862  |
| H | -4.740952264 | -1.286786561 | 1.715887279  |
| H | -3.418115938 | -3.598444373 | -1.612012120 |
| H | -0.835136066 | -1.632205287 | -2.707973703 |
| H | -0.231026470 | -2.995542894 | -1.750817840 |
| H | -1.658406004 | -3.184619725 | -2.756675455 |
| H | -5.840393937 | -3.628968641 | -0.866963607 |
| H | -5.286409723 | -4.331841583 | 0.655709825  |
| H | -6.272592955 | -2.864191600 | 0.673801884  |
| H | -1.780903822 | 0.286216032  | 2.526549273  |
| H | -2.778892279 | 1.330482351  | 1.483573035  |
| H | -3.532281161 | 0.273960587  | 2.681970384  |
| H | -0.353546797 | 1.782352556  | 2.891705730  |
| H | 1.238956982  | 1.857231350  | 2.144802859  |

|   |              |              |              |
|---|--------------|--------------|--------------|
| H | 0.490801870  | 3.323958998  | 2.758882070  |
| H | -1.470311992 | 6.149979998  | -1.804534047 |
| H | -2.697570210 | 6.053308092  | -0.537962508 |
| H | -1.044119334 | 6.528073789  | -0.125420622 |
| H | -0.794811953 | 0.598581209  | -2.764093553 |
| H | -2.411440428 | 0.414515834  | -2.072493838 |
| H | -2.084427933 | 1.697999752  | -3.240332760 |
| H | 5.088970291  | -0.614300164 | -1.425633461 |
| H | 3.826573250  | 0.120061527  | -2.427549983 |
| H | 5.107303867  | 1.124591789  | -1.731454565 |
| H | 5.120837405  | -0.253627647 | 1.120393801  |
| H | 5.261170663  | 1.469533128  | 0.764900138  |
| H | 3.986243186  | 0.882441516  | 1.848677616  |
| H | 2.372694908  | 1.995996011  | -1.386423869 |
| H | 2.279799970  | 2.161500404  | 0.370940351  |
| H | 3.722484785  | 2.684538829  | -0.492785720 |
| H | 2.186892783  | -2.752924727 | -2.166193236 |
| H | 3.878550888  | -2.258704096 | -2.092213773 |
| H | 3.396957436  | -3.864236804 | -1.536273445 |
| H | 4.322237968  | -3.697009050 | 0.731137910  |
| H | 5.059889512  | -2.182352830 | 0.203787231  |
| H | 4.107763403  | -2.228847232 | 1.699997221  |
| H | 1.713482720  | -3.010805232 | 1.596411733  |
| H | 0.773321927  | -2.933111364 | 0.105336987  |
| H | 1.957320994  | -4.217361098 | 0.328949176  |
| H | 0.905835034  | -1.333459565 | -1.612868386 |
| H | 1.213761495  | 0.390085761  | -1.733545529 |

## 1PB'

Total number of atoms = 72

|   |              |              |              |
|---|--------------|--------------|--------------|
| C | -0.462662118 | -1.172172257 | -0.559151691 |
| C | 0.070506454  | -1.692570089 | -1.674229021 |
| P | 0.512112792  | -0.322609043 | 0.772033677  |
| B | -2.019917934 | -1.416917758 | -0.313143778 |
| C | -3.090356378 | -0.584407156 | -1.195474037 |
| C | -2.462164863 | 0.209869688  | -2.354440344 |
| C | -4.218210432 | -1.433737749 | -1.818294332 |
| C | -3.717855238 | 0.456266815  | -0.232566794 |
| C | -2.439361420 | -2.593359859 | 0.710855498  |
| C | -2.538348497 | -3.838466249 | -0.214273512 |
| C | -3.768681191 | -2.419446579 | 1.468194173  |
| C | -1.376894535 | -2.928523585 | 1.772170534  |
| C | -0.096711910 | 1.394383390  | 0.426175785  |
| C | -1.235309715 | 3.961454736  | 0.079428822  |
| C | -0.866741988 | 1.984326542  | 1.452165528  |
| C | 0.101180073  | 2.104976897  | -0.780292246 |

|   |              |              |              |
|---|--------------|--------------|--------------|
| C | -0.471747452 | 3.369882577  | -0.923237977 |
| C | -1.416565019 | 3.253313170  | 1.262566489  |
| C | 2.315908167  | -0.402208905 | 0.347256397  |
| C | 5.060487308  | -0.656090605 | -0.346344820 |
| C | 3.185080146  | 0.714497638  | 0.419024530  |
| C | 2.898008175  | -1.677255474 | 0.135013102  |
| C | 4.238336626  | -1.771876116 | -0.243866480 |
| C | 4.522069120  | 0.564543873  | 0.045803432  |
| C | -1.869613361 | 5.313375080  | -0.124159998 |
| C | -1.149811862 | 1.283736670  | 2.763778931  |
| C | 0.913557277  | 1.578308069  | -1.938407049 |
| C | 2.796549180  | 2.074185247  | 0.964271769  |
| C | 6.489996594  | -0.770078056 | -0.808260663 |
| C | 2.175526547  | -2.972490197 | 0.428186983  |
| H | -1.212885067 | -2.103052550 | 2.471893031  |
| H | -1.697981977 | -3.803612990 | 2.354303626  |
| H | -3.988586329 | -3.331724031 | 2.039588369  |
| H | -2.740531640 | -4.726893894 | 0.398954042  |
| H | -3.338880134 | -3.760899918 | -0.954943718 |
| H | -4.626006024 | -2.230846880 | 0.819106728  |
| H | -3.707182970 | -1.595088521 | 2.188950101  |
| H | -0.415338529 | -3.171666165 | 1.315455661  |
| H | -1.595261064 | -4.017469201 | -0.745594692 |
| H | -3.244892816 | 0.763571179  | -2.890993801 |
| H | -4.921923750 | -0.774720552 | -2.344797009 |
| H | -4.796142817 | -2.004596841 | -1.088616304 |
| H | -1.733938025 | 0.938019822  | -1.994102335 |
| H | -3.822787126 | -2.140541698 | -2.558198313 |
| H | -1.961455390 | -0.439613053 | -3.080437421 |
| H | -4.423730624 | 1.084134890  | -0.793701395 |
| H | -4.269730205 | -0.003465617 | 0.591364637  |
| H | -2.960968765 | 1.125850854  | 0.189852980  |
| H | 5.170165152  | 1.438313013  | 0.086301283  |
| H | 4.658483754  | -2.758718475 | -0.427791039 |
| H | -0.315505115 | 3.909855846  | -1.855006409 |
| H | -2.007452429 | 3.696149778  | 2.061558798  |
| H | 1.135549118  | -1.648246208 | -1.898419418 |
| H | 6.893271749  | -1.770150612 | -0.620184337 |
| H | 7.133094501  | -0.043157729 | -0.301646155 |
| H | 6.568447137  | -0.581776469 | -1.886024405 |
| H | 3.689180162  | 2.565448143  | 1.363256469  |
| H | 1.932240565  | 1.312973705  | -1.644926104 |
| H | 2.367840931  | 2.736624065  | 0.206505295  |
| H | 2.069341160  | 2.004357484  | 1.776645133  |
| H | 2.886802275  | -3.803188855 | 0.436505158  |
| H | 1.387334054  | -3.211361833 | -0.289950946 |
| H | 1.709119523  | -2.927131071 | 1.418868844  |

|   |              |              |              |
|---|--------------|--------------|--------------|
| H | 0.973102215  | 2.329398932  | -2.731115248 |
| H | -1.246844630 | 5.955752036  | -0.754713396 |
| H | -2.844070010 | 5.213105050  | -0.617266349 |
| H | -2.033386107 | 5.824748396  | 0.829375027  |
| H | -1.732262090 | 1.933799404  | 3.423530594  |
| H | -0.230553790 | 0.999294111  | 3.285065595  |
| H | -1.723023257 | 0.361533410  | 2.613252009  |
| H | 0.462935514  | 0.676139984  | -2.360370566 |
| H | -0.544707578 | -2.200047467 | -2.417678350 |

### TS14\_PB<sup>f</sup>

Total number of atoms = 75

|   |              |              |              |
|---|--------------|--------------|--------------|
| C | 1.029105932  | 0.933994796  | -1.974932819 |
| C | 1.185996260  | 0.319214228  | -0.793647673 |
| P | -0.290393862 | 0.080175207  | 0.301335539  |
| C | -1.406231488 | 1.497898015  | -0.093713792 |
| C | -2.323642041 | 1.508617215  | -1.167145039 |
| C | -1.333441139 | 2.623568553  | 0.760283900  |
| C | -3.115569249 | 2.642485906  | -1.370347292 |
| C | -2.142086165 | 3.729685730  | 0.511147669  |
| C | -3.041861053 | 3.761814500  | -0.551186397 |
| C | -1.336801418 | -1.429737689 | 0.053841570  |
| C | -2.349958993 | -1.567494708 | 1.042931681  |
| C | -1.218598469 | -2.431200553 | -0.930190119 |
| C | -3.160303777 | -2.698971074 | 1.045476906  |
| C | -2.048488692 | -3.555094447 | -0.869810172 |
| C | -3.015843955 | -3.720362240 | 0.109281557  |
| C | 3.694717555  | 1.320113065  | -0.170323358 |
| C | 3.216183884  | -1.503750189 | -0.380423918 |
| B | 2.694828353  | 0.028843055  | -0.268075395 |
| C | 1.083623847  | -0.257671892 | 2.407616774  |
| C | -0.293906053 | -2.385643768 | -2.123168907 |
| C | -3.878412985 | -4.954312076 | 0.165919339  |
| C | -2.650994379 | -0.504943802 | 2.075275817  |
| C | -0.435468997 | 2.671330063  | 1.973931547  |
| C | -3.915257542 | 4.967142782  | -0.786580123 |
| C | -2.541625828 | 0.356472874  | -2.121049860 |
| C | 4.546543705  | 1.377633488  | -1.463476824 |
| C | 4.685382266  | 1.282376839  | 1.015801184  |
| C | 2.951105927  | 2.663938429  | -0.039255117 |
| C | 3.303458057  | -1.809306414 | -1.898556819 |
| C | 4.596688570  | -1.816681749 | 0.222365625  |
| C | 2.239370144  | -2.511578163 | 0.258244397  |
| O | 2.132323643  | 0.041669038  | 1.926464804  |
| O | 0.366608631  | -0.625604792 | 3.266548813  |

|   |              |              |              |
|---|--------------|--------------|--------------|
| H | 0.063792819  | 1.215622399  | -2.387645841 |
| H | -3.815515102 | 2.644776401  | -2.203246008 |
| H | -2.071480798 | 4.590755321  | 1.172558154  |
| H | -3.930753786 | -2.784190595 | 1.808866885  |
| H | -1.934405391 | -4.317391405 | -1.638718815 |
| H | -0.872319047 | -2.540287899 | -3.041316969 |
| H | 0.236741443  | -1.443118750 | -2.216149751 |
| H | 0.452928208  | -3.185402145 | -2.070913091 |
| H | -4.915375100 | -4.705271515 | 0.414404760  |
| H | -3.875715828 | -5.487537020 | -0.789476806 |
| H | -3.515321409 | -5.647399064 | 0.934168652  |
| H | -3.340154011 | -0.896606658 | 2.828537601  |
| H | -1.753114494 | -0.168343654 | 2.597696915  |
| H | -3.121487618 | 0.371391190  | 1.615080182  |
| H | -0.754619462 | 1.946139558  | 2.730989282  |
| H | 0.606871344  | 2.454951377  | 1.728953934  |
| H | -0.466090821 | 3.663802760  | 2.432110208  |
| H | -4.423753474 | 4.909620316  | -1.753345904 |
| H | -4.683368218 | 5.050359781  | -0.008745643 |
| H | -3.328371758 | 5.891632929  | -0.765228053 |
| H | -1.610485238 | -0.110762298 | -2.445793789 |
| H | -3.149434884 | -0.429950834 | -1.661356573 |
| H | -3.064872622 | 0.706665569  | -3.015541456 |
| H | 5.212889728  | 0.514177895  | -1.555604376 |
| H | 3.942882867  | 1.431853874  | -2.376871628 |
| H | 5.178769321  | 2.275850352  | -1.443403580 |
| H | 5.397676786  | 0.459324854  | 0.955848542  |
| H | 5.270372881  | 2.212540902  | 1.022159865  |
| H | 4.166679351  | 1.211407890  | 1.975382842  |
| H | 2.244154549  | 2.851892193  | -0.851003666 |
| H | 2.395523217  | 2.707734869  | 0.903437237  |
| H | 3.673797977  | 3.490927831  | -0.026652274 |
| H | 4.044229920  | -1.179758481 | -2.403045235 |
| H | 3.610452929  | -2.853874765 | -2.044724857 |
| H | 2.348564463  | -1.671604213 | -2.410871716 |
| H | 4.817095236  | -2.885930377 | 0.094741925  |
| H | 5.405677836  | -1.263965575 | -0.265046331 |
| H | 4.628329264  | -1.600126423 | 1.295080728  |
| H | 2.317415120  | -2.497482015 | 1.350504525  |
| H | 1.194147877  | -2.333852697 | -0.000604445 |
| H | 2.481741560  | -3.532996413 | -0.066280060 |
| H | 1.884108689  | 1.201840867  | -2.592558791 |

#### 4PB<sup>f</sup>

Total number of atoms = 75

|   |              |              |              |
|---|--------------|--------------|--------------|
| C | 1.195946666  | 0.082800262  | -2.272430905 |
| C | 1.185917058  | -0.169057531 | -0.960960735 |
| P | -0.287731642 | -0.025922394 | 0.070698676  |
| C | -0.981923447 | 1.664096096  | -0.055867020 |
| C | -1.838691279 | 1.931009234  | -1.148503673 |
| C | -0.654031482 | 2.699090117  | 0.850906054  |
| C | -2.316125902 | 3.226987345  | -1.332954920 |
| C | -1.162034358 | 3.976050602  | 0.609930754  |
| C | -1.986730122 | 4.267162162  | -0.470931031 |
| C | -1.650865353 | -1.248959539 | 0.014304344  |
| C | -2.694215688 | -1.078404442 | 0.959707306  |
| C | -1.693550612 | -2.337410661 | -0.889313757 |
| C | -3.716462978 | -2.024478148 | 1.008277732  |
| C | -2.741680695 | -3.252081770 | -0.781765607 |
| C | -3.753291877 | -3.127585070 | 0.163308747  |
| C | 3.611304306  | 0.850772579  | -0.149323146 |
| C | 3.041752101  | -1.986222207 | -0.061203596 |
| B | 2.520273663  | -0.404157783 | 0.010211570  |
| C | 0.666397565  | -0.353603951 | 1.697998075  |
| C | -0.724721787 | -2.569986688 | -2.024085668 |
| C | -4.840419395 | -4.162525100 | 0.282406426  |
| C | -2.812523710 | 0.095941029  | 1.904319699  |
| C | 0.162047295  | 2.525972264  | 2.110112724  |
| C | -2.533592148 | 5.654775950  | -0.680525088 |
| C | -2.343121465 | 0.882954479  | -2.114757528 |
| C | 4.661076880  | 0.624801972  | -1.254582510 |
| C | 4.370127873  | 1.080218652  | 1.175840925  |
| C | 2.927414546  | 2.194022104  | -0.483892818 |
| C | 3.312337467  | -2.455985807 | -1.502413033 |
| C | 4.316972048  | -2.239097946 | 0.765721013  |
| C | 1.976467115  | -2.928062349 | 0.544239907  |
| O | 1.922949577  | -0.267325621 | 1.464836656  |
| O | 0.110747677  | -0.609569030 | 2.742591229  |
| H | 0.321850290  | 0.316889161  | -2.874646661 |
| H | -2.969338800 | 3.425681376  | -2.179711919 |
| H | -0.900095252 | 4.772641664  | 1.301875223  |
| H | -4.508373628 | -1.892611420 | 1.741589723  |
| H | -2.765165168 | -4.091742522 | -1.472096250 |
| H | -0.865334334 | -1.834164376 | -2.824159133 |
| H | 0.319186797  | -2.515739177 | -1.723445181 |
| H | -0.896490413 | -3.557344460 | -2.459641864 |
| H | -5.031729443 | -4.654189880 | -0.676077377 |
| H | -4.549874255 | -4.938346038 | 1.000495120  |
| H | -5.776272449 | -3.719813722 | 0.636488396  |
| H | -1.877855081 | 0.293129455  | 2.430660194  |
| H | -3.119163816 | 1.003170555  | 1.372526422  |
| H | -3.569625304 | -0.117549820 | 2.663101366  |

|   |              |              |              |
|---|--------------|--------------|--------------|
| H | -0.372797119 | 1.923856338  | 2.851069873  |
| H | 1.129947198  | 2.051104768  | 1.941797369  |
| H | 0.358065362  | 3.502604825  | 2.559000249  |
| H | -2.716855732 | 5.854336005  | -1.740525887 |
| H | -3.485785839 | 5.778873936  | -0.151142998 |
| H | -1.843701305 | 6.415166627  | -0.302844768 |
| H | -1.601528594 | 0.124887296  | -2.367019072 |
| H | -3.204947112 | 0.352630708  | -1.693905504 |
| H | -2.659604538 | 1.354935271  | -3.048712112 |
| H | 5.305232686  | -0.235747823 | -1.052364335 |
| H | 4.203270649  | 0.471728650  | -2.239940824 |
| H | 5.314632510  | 1.505443921  | -1.339923626 |
| H | 4.910091452  | 0.191981113  | 1.512324312  |
| H | 5.106928643  | 1.888184447  | 1.055749666  |
| H | 3.687148096  | 1.370616887  | 1.981535599  |
| H | 2.505042885  | 2.208851093  | -1.493917446 |
| H | 2.112098096  | 2.433001654  | 0.206736672  |
| H | 3.654730115  | 3.016094372  | -0.419923357 |
| H | 2.413881251  | -2.407762605 | -2.128888411 |
| H | 4.085270724  | -1.859420243 | -1.996538306 |
| H | 3.655212180  | -3.500785001 | -1.507659606 |
| H | 4.553167392  | -3.313829312 | 0.778443693  |
| H | 5.192406620  | -1.722705174 | 0.360630834  |
| H | 4.184762318  | -1.919950255 | 1.805620066  |
| H | 1.900067048  | -2.805126488 | 1.629688500  |
| H | 0.971092602  | -2.773767988 | 0.133605265  |
| H | 2.233955589  | -3.979178678 | 0.351699434  |
| H | 2.138854221  | 0.069584887  | -2.813890347 |

### 1PB<sup>a</sup>

Total number of atoms = 82

|   |              |              |              |
|---|--------------|--------------|--------------|
| C | 1.150918710  | 0.394804325  | -1.103463963 |
| C | 0.850645878  | -0.326989718 | -0.006780833 |
| B | 1.833515547  | -1.052908758 | 1.018317299  |
| P | -0.825878855 | -0.145639974 | 0.780200471  |
| C | 1.713784859  | -2.650554363 | 1.304625223  |
| C | 2.888731353  | -0.097750360 | 1.803024093  |
| C | -2.121464137 | -1.135731325 | -0.106948882 |
| C | -4.357670580 | -2.560516753 | -1.129179118 |
| C | -3.374274201 | -1.102890235 | 0.555525353  |
| C | -2.000124475 | -1.915989359 | -1.281044747 |
| C | -3.116849487 | -2.609854211 | -1.753591278 |
| C | -4.462794184 | -1.795063424 | 0.025819017  |
| C | -1.306214157 | 1.623981966  | 0.468462721  |
| C | -1.911456339 | 4.391185683  | 0.249078767  |



|   |              |              |              |
|---|--------------|--------------|--------------|
| C | -1.103692642 | 2.503017746  | 1.561110542  |
| C | -1.879271958 | 2.145660279  | -0.716412872 |
| C | -2.155976627 | 3.512015232  | -0.799972381 |
| C | -1.394060264 | 3.861218897  | 1.424730818  |
| C | 2.503224215  | -0.122113577 | 3.309458257  |
| C | 2.878507473  | 1.377702752  | 1.353708708  |
| C | 4.350247508  | -0.579213421 | 1.653715437  |
| C | 2.501899029  | -3.348326345 | 0.166326400  |
| C | 0.268237805  | -3.183556127 | 1.249852853  |
| C | 2.282661495  | -3.175152854 | 2.638799812  |
| C | -3.602755901 | -0.327191864 | 1.834012227  |
| C | -0.749881740 | -2.038457380 | -2.125467901 |
| C | -0.609260266 | 2.040707652  | 2.913949902  |
| C | -2.274884186 | 1.313862262  | -1.914565921 |
| C | 2.431645834  | 0.498467811  | -1.817596575 |
| C | 4.883437283  | 0.851256660  | -3.144410211 |
| C | 2.682114839  | 1.653101978  | -2.573753852 |
| C | 3.421225832  | -0.488777963 | -1.771410922 |
| C | 4.637486090  | -0.313642335 | -2.422854230 |
| C | 3.897599159  | 1.833540244  | -3.221910897 |
| C | -5.533757086 | -3.337034872 | -1.663270532 |
| C | -2.242590995 | 5.856659886  | 0.129480441  |
| H | 0.377161844  | 1.024369375  | -1.538457316 |
| H | -3.011257509 | -3.201950235 | -2.660513363 |
| H | -5.419038444 | -1.741215114 | 0.542449389  |
| H | -2.584774587 | 3.900605287  | -1.721825767 |
| H | -1.217481249 | 4.522343218  | 2.270690432  |
| H | 2.911766115  | 0.766449103  | 3.807497837  |
| H | 2.905559721  | -0.996151609 | 3.823635889  |
| H | 1.417911779  | -0.117478867 | 3.468842147  |
| H | 3.248137237  | 1.496221906  | 0.332468232  |
| H | 3.536533945  | 1.965567630  | 2.007855407  |
| H | 1.882619331  | 1.828617559  | 1.391072933  |
| H | 4.705177650  | -0.441838380 | 0.626637989  |
| H | 4.492659325  | -1.629564159 | 1.920042289  |
| H | 5.001702173  | 0.015944054  | 2.308539430  |
| H | 2.084213241  | -3.128190158 | -0.822673090 |
| H | 2.448509186  | -4.436832041 | 0.302911680  |
| H | 3.564012307  | -3.073168831 | 0.164296638  |
| H | -0.220971473 | -2.995498448 | 0.294631745  |
| H | -0.355757880 | -2.743866075 | 2.035284699  |
| H | 0.270694262  | -4.272081228 | 1.398566598  |
| H | 3.333885168  | -2.925508001 | 2.799180332  |
| H | 2.207506830  | -4.270982815 | 2.655942363  |
| H | 1.709234127  | -2.801169541 | 3.492622176  |
| H | -4.613809536 | -0.505043655 | 2.211540847  |
| H | -3.485950773 | 0.752455530  | 1.687021028  |

|   |              |              |              |
|---|--------------|--------------|--------------|
| H | -2.891610986 | -0.625097713 | 2.612503049  |
| H | -0.884341388 | -2.825643569 | -2.872946897 |
| H | 0.142030192  | -2.275651297 | -1.545693303 |
| H | -0.524295134 | -1.112259123 | -2.664115370 |
| H | 0.437010521  | 1.726686501  | 2.888290337  |
| H | -1.188099189 | 1.189987509  | 3.285765818  |
| H | -0.687628866 | 2.853979611  | 3.641773984  |
| H | -2.452803278 | 1.960254513  | -2.779120598 |
| H | -3.195160576 | 0.753568903  | -1.718268739 |
| H | -1.517052831 | 0.583921461  | -2.196085926 |
| H | 1.918135024  | 2.424867061  | -2.628123804 |
| H | 3.233779379  | -1.410351698 | -1.235083063 |
| H | 5.391752014  | -1.093487347 | -2.371898687 |
| H | 4.077650072  | 2.742804556  | -3.787833038 |
| H | 5.833169560  | 0.989141474  | -3.652368832 |
| H | -6.475400146 | -2.806568040 | -1.488981568 |
| H | -5.612602077 | -4.314468258 | -1.171876003 |
| H | -5.437458672 | -3.516196514 | -2.738684913 |
| H | -3.295682182 | 6.039910282  | 0.375265099  |
| H | -2.076858125 | 6.220807641  | -0.889538319 |
| H | -1.634499666 | 6.460641505  | 0.809893910  |

### TS14\_PB<sup>a</sup>

Total number of atoms = 85

|   |              |              |              |
|---|--------------|--------------|--------------|
| C | 1.090643275  | 0.652975282  | -1.031652051 |
| C | 0.860097493  | -0.195603223 | -0.004903999 |
| P | -0.896109978 | -0.116493011 | 0.603477790  |
| C | -1.338603139 | 1.679883563  | 0.498500210  |
| C | -1.954420141 | 2.301781501  | -0.614364855 |
| C | -1.021565811 | 2.466989518  | 1.630982528  |
| C | -2.223266272 | 3.672470780  | -0.560078079 |
| C | -1.303410423 | 3.831555494  | 1.626638239  |
| C | -1.910626616 | 4.456958971  | 0.543121047  |
| C | -2.110349282 | -1.014893794 | -0.456206132 |
| C | -3.432305640 | -0.997572185 | 0.055124745  |
| C | -1.846200878 | -1.739476444 | -1.642933096 |
| C | -4.426164335 | -1.742384055 | -0.578860296 |
| C | -2.879485773 | -2.474311412 | -2.227685889 |
| C | -4.169403332 | -2.507324125 | -1.709999830 |
| C | 3.178500756  | -0.227162252 | 1.519907852  |
| C | 1.914338608  | -2.700485377 | 0.783510034  |
| B | 1.947630429  | -1.065496069 | 0.825699527  |
| C | -0.741372368 | -1.250257684 | 2.725463865  |
| C | 2.287465041  | 0.884702027  | -1.855224510 |
| C | 2.483232479  | 2.173999914  | -2.373939193 |

|   |              |              |              |
|---|--------------|--------------|--------------|
| C | 3.208694014  | -0.111485104 | -2.184232430 |
| C | 3.597504036  | 2.468953601  | -3.147602296 |
| C | 4.321355221  | 0.178476741  | -2.968524190 |
| C | 4.524751550  | 1.470128987  | -3.443807053 |
| C | -0.543301152 | -1.720286068 | -2.411998323 |
| C | -5.247189769 | -3.345957416 | -2.345943222 |
| C | -3.870216313 | -0.118559103 | 1.205000366  |
| C | -0.406585946 | 1.894550589  | 2.884342099  |
| C | -2.238149253 | 5.927201402  | 0.577199469  |
| C | -2.368891168 | 1.600318282  | -1.889377784 |
| C | 4.554001788  | -0.719548944 | 1.002436771  |
| C | 3.190754516  | -0.383279220 | 3.062415457  |
| C | 3.151790976  | 1.295734775  | 1.266994828  |
| C | 2.686346397  | -3.149794370 | -0.486339024 |
| C | 2.575833364  | -3.408687888 | 1.984012041  |
| C | 0.508874669  | -3.332386274 | 0.671428096  |
| O | 0.440055698  | -1.191566081 | 2.905079488  |
| O | -1.824599925 | -1.606592019 | 3.054762991  |
| H | 0.275783900  | 1.299994464  | -1.349647560 |
| H | -2.691440525 | 4.141785584  | -1.422747870 |
| H | -1.042992711 | 4.421184187  | 2.503035770  |
| H | -5.433574566 | -1.718482119 | -0.168890556 |
| H | -2.665336520 | -3.032777163 | -3.136327746 |
| H | 1.760064679  | 2.952314007  | -2.141781412 |
| H | 3.045070622  | -1.122792582 | -1.838713044 |
| H | 3.742350555  | 3.476244751  | -3.526456145 |
| H | 5.026908693  | -0.610252134 | -3.212604621 |
| H | 5.393970642  | 1.696876981  | -4.053855015 |
| H | -0.375939126 | -0.747624430 | -2.889588239 |
| H | 0.332025074  | -1.913495237 | -1.795872176 |
| H | -0.571007881 | -2.472999128 | -3.204373760 |
| H | -6.229955894 | -2.874771648 | -2.244560412 |
| H | -5.053362363 | -3.508252652 | -3.410683012 |
| H | -5.304417807 | -4.330379007 | -1.866221125 |
| H | -4.826555762 | -0.468605396 | 1.603071113  |
| H | -3.160985828 | -0.109200032 | 2.033164769  |
| H | -4.004406509 | 0.916147884  | 0.866199354  |
| H | -1.131434698 | 1.282470736  | 3.434084558  |
| H | 0.464802629  | 1.267656458  | 2.684287772  |
| H | -0.085390558 | 2.698887479  | 3.551878543  |
| H | -2.328414488 | 6.341818884  | -0.431429901 |
| H | -3.191187436 | 6.099527099  | 1.091577595  |
| H | -1.469646171 | 6.493682788  | 1.112578460  |
| H | -1.611276267 | 0.910764138  | -2.263838674 |
| H | -3.286937516 | 1.019937448  | -1.751879723 |
| H | -2.555995042 | 2.340763278  | -2.672271512 |
| H | 4.747202310  | -1.770641339 | 1.230940088  |

|   |              |              |              |
|---|--------------|--------------|--------------|
| H | 4.661626912  | -0.577290445 | -0.077380503 |
| H | 5.347975053  | -0.133385471 | 1.484835551  |
| H | 3.186945945  | -1.419736551 | 3.399065222  |
| H | 4.100809271  | 0.091173508  | 3.454360912  |
| H | 2.332681438  | 0.112033242  | 3.522950040  |
| H | 3.374275889  | 1.549653738  | 0.228779957  |
| H | 2.188492236  | 1.749112974  | 1.519661287  |
| H | 3.916994354  | 1.780103712  | 1.888114315  |
| H | 2.155830855  | -2.887534312 | -1.408276821 |
| H | 3.700176757  | -2.741785568 | -0.541003995 |
| H | 2.779247172  | -4.243850656 | -0.478798429 |
| H | 2.505776568  | -4.496197705 | 1.842597526  |
| H | 3.635361602  | -3.168843503 | 2.102103091  |
| H | 2.060738854  | -3.165730487 | 2.917615865  |
| H | -0.017909168 | -3.329142208 | 1.628405335  |
| H | -0.136818238 | -2.855842039 | -0.066524037 |
| H | 0.603665008  | -4.385740123 | 0.374582373  |

#### 4PB<sup>a</sup>

Total number of atoms = 85

|   |              |              |              |
|---|--------------|--------------|--------------|
| C | -1.196179372 | 0.558548763  | 1.137241532  |
| C | -0.872430667 | -0.232754385 | 0.091272565  |
| P | 0.856216255  | -0.043839508 | -0.412592895 |
| C | 1.350910129  | 1.723967383  | -0.419597048 |
| C | 1.906610131  | 2.298226924  | 0.751422243  |
| C | 1.104583173  | 2.540135411  | -1.550796162 |
| C | 2.177094970  | 3.666014683  | 0.765075926  |
| C | 1.398962967  | 3.901530405  | -1.470597160 |
| C | 1.931715627  | 4.487762036  | -0.329282815 |
| C | 2.161717261  | -1.032632675 | 0.408319219  |
| C | 3.453236744  | -0.999452430 | -0.165096727 |
| C | 1.929529216  | -1.808059916 | 1.575245579  |
| C | 4.464913332  | -1.774511719 | 0.409744515  |
| C | 2.977740300  | -2.564640439 | 2.089071726  |
| C | 4.249619781  | -2.576422814 | 1.519239126  |
| C | -3.018712840 | -0.231582549 | -1.713510840 |
| C | -1.812193000 | -2.741876316 | -0.905406919 |
| B | -1.695304670 | -1.083926098 | -1.125047955 |
| C | 0.613768891  | -0.798346151 | -2.141342152 |
| C | -2.461546340 | 0.761721589  | 1.864501924  |
| C | -2.745455738 | 2.058411745  | 2.319304647  |
| C | -3.350996038 | -0.266171607 | 2.180994724  |
| C | -3.911763518 | 2.328275081  | 3.022366352  |
| C | -4.512077491 | -0.001050314 | 2.901303434  |
| C | -4.801610347 | 1.295606920  | 3.314611187  |

|   |              |              |              |
|---|--------------|--------------|--------------|
| C | 0.638861438  | -1.844372222 | 2.361749003  |
| C | 5.343435085  | -3.432154385 | 2.101097824  |
| C | 3.873792571  | -0.180442272 | -1.366083951 |
| C | 0.594401759  | 2.040106428  | -2.881204673 |
| C | 2.260668857  | 5.956700268  | -0.285954246 |
| C | 2.268783548  | 1.540334047  | 2.010777491  |
| C | -4.373942466 | -0.676538644 | -1.128395545 |
| C | -3.116612146 | -0.386255950 | -3.250098293 |
| C | -2.931612391 | 1.289822031  | -1.461760931 |
| C | -2.587548083 | -3.160817529 | 0.353514015  |
| C | -2.482322967 | -3.436825616 | -2.109278254 |
| C | -0.416093481 | -3.398140665 | -0.809410237 |
| O | -0.637332667 | -1.002308070 | -2.310768906 |
| O | 1.524428606  | -1.026759540 | -2.906462243 |
| H | -0.426168524 | 1.217209782  | 1.542288430  |
| H | 2.595521886  | 4.102585284  | 1.668992375  |
| H | 1.202396196  | 4.522928980  | -2.340670989 |
| H | 5.453569413  | -1.743347273 | -0.042613037 |
| H | 2.796193583  | -3.162193310 | 2.979217667  |
| H | -2.048724832 | 2.862854709  | 2.094253893  |
| H | -3.128578108 | -1.276089597 | 1.867582481  |
| H | -4.124904324 | 3.342060016  | 3.347905480  |
| H | -5.192935241 | -0.813351055 | 3.137626056  |
| H | -5.712136990 | 1.500937381  | 3.869575337  |
| H | 0.436768292  | -0.889914479 | 2.860157684  |
| H | -0.232179471 | -2.064906763 | 1.747250922  |
| H | 0.705360148  | -2.610473528 | 3.138189719  |
| H | 5.437184135  | -3.275111056 | 3.180928652  |
| H | 5.126762933  | -4.494663038 | 1.942528676  |
| H | 6.310602522  | -3.215622560 | 1.638966629  |
| H | 3.911831999  | -0.811678702 | -2.257024864 |
| H | 3.211032436  | 0.651692440  | -1.596846822 |
| H | 4.871214998  | 0.234661501  | -1.188012568 |
| H | 1.353139843  | 1.441921170  | -3.395819314 |
| H | -0.305567537 | 1.428891954  | -2.800517557 |
| H | 0.345759554  | 2.887894242  | -3.524126538 |
| H | 2.102535613  | 6.371279385  | 0.714426268  |
| H | 3.312105730  | 6.123757637  | -0.548374213 |
| H | 1.648465964  | 6.524530367  | -0.992478777 |
| H | 1.502249872  | 0.833546127  | 2.331570134  |
| H | 3.196449604  | 0.974005128  | 1.881629405  |
| H | 2.417974599  | 2.246630331  | 2.831741429  |
| H | -4.612063956 | -1.718422645 | -1.361442217 |
| H | -4.414718533 | -0.555875699 | -0.042420946 |
| H | -5.182240791 | -0.060507356 | -1.549449968 |
| H | -3.178096841 | -1.427521941 | -3.573319959 |
| H | -4.018142436 | 0.126114546  | -3.616226371 |

|   |              |              |              |
|---|--------------|--------------|--------------|
| H | -2.253567920 | 0.059357798  | -3.755880119 |
| H | -3.112464277 | 1.548478653  | -0.415809359 |
| H | -1.959423017 | 1.712170932  | -1.737348433 |
| H | -3.692904912 | 1.813017797  | -2.057992182 |
| H | -2.069252994 | -2.860672060 | 1.272243449  |
| H | -3.598447204 | -2.743354979 | 0.380075780  |
| H | -2.687787674 | -4.255194814 | 0.395778013  |
| H | -2.437271356 | -4.528800321 | -1.981987881 |
| H | -3.536828310 | -3.171247147 | -2.223291275 |
| H | -1.967310723 | -3.194384432 | -3.044827476 |
| H | 0.124685304  | -3.346319415 | -1.760135223 |
| H | 0.225723279  | -2.958071823 | -0.040634615 |
| H | -0.514793366 | -4.463728933 | -0.557917852 |

### TS13\_ <sup>t</sup>Bu<sub>3</sub>P/BPh<sub>3</sub>

Total number of atoms = 76

|   |              |              |              |
|---|--------------|--------------|--------------|
| P | 1.903338595  | 0.007319955  | 0.477979804  |
| C | 2.352882923  | -1.742999440 | 1.082482831  |
| C | 1.754407755  | -1.971723847 | 2.484064753  |
| C | 1.640459924  | -2.761741160 | 0.166229266  |
| C | 3.855417217  | -2.060624985 | 1.134305335  |
| C | 2.925444499  | 0.454624324  | -1.069251210 |
| C | 2.959219465  | -0.734436281 | -2.046852614 |
| C | 4.378926917  | 0.868140624  | -0.784047487 |
| C | 2.189150225  | 1.595812403  | -1.804191796 |
| C | 2.247112183  | 1.275581931  | 1.864387103  |
| C | 2.205966830  | 2.704630971  | 1.289947499  |
| C | 1.074851395  | 1.201895182  | 2.869156646  |
| C | 3.574404306  | 1.090760064  | 2.615577959  |
| B | -1.825206558 | -0.034765430 | -0.296636386 |
| C | -3.011822135 | -0.019212847 | 0.789922892  |
| C | -4.151303319 | 0.772294958  | 0.586675267  |
| C | -5.205533072 | 0.785833142  | 1.498042946  |
| C | -5.141992769 | 0.010919494  | 2.652903803  |
| C | -4.018013730 | -0.778589085 | 2.885328168  |
| C | -2.975107888 | -0.790201604 | 1.962567826  |
| C | -1.573393761 | 1.366917013  | -1.038514128 |
| C | -1.769372013 | 1.558786910  | -2.413032811 |
| C | -1.545270068 | 2.793480334  | -3.022923893 |
| C | -1.116327251 | 3.880347010  | -2.267430516 |
| C | -0.940359986 | 3.727325580  | -0.893175225 |
| C | -1.175045556 | 2.491629857  | -0.298661868 |
| C | -1.590565031 | -1.390324645 | -1.124491859 |
| C | -2.219316442 | -2.595415548 | -0.772576867 |
| C | -1.934763062 | -3.792740366 | -1.425117842 |

|   |              |              |              |
|---|--------------|--------------|--------------|
| C | -1.010899232 | -3.821026750 | -2.467269903 |
| C | -0.385767753 | -2.639174147 | -2.854011066 |
| C | -0.675141913 | -1.449932105 | -2.188331715 |
| H | 0.037132538  | -0.034566500 | 0.437134052  |
| H | 1.864776017  | -3.034346660 | 2.731832351  |
| H | 0.684272079  | -1.741138859 | 2.516263173  |
| H | 2.263364024  | -1.406190938 | 3.267419595  |
| H | 1.812798003  | -3.767490220 | 0.570005043  |
| H | 2.005556789  | -2.757990962 | -0.859478562 |
| H | 0.559445903  | -2.595008341 | 0.133957211  |
| H | 3.993005285  | -3.063776172 | 1.558432589  |
| H | 4.412108309  | -1.358844990 | 1.760777734  |
| H | 4.313595745  | -2.067095137 | 0.142370688  |
| H | 3.397863324  | -0.386279859 | -2.990000432 |
| H | 1.961196204  | -1.118330270 | -2.267709578 |
| H | 3.580183983  | -1.558750867 | -1.689635681 |
| H | 4.889278572  | 1.043299597  | -1.739923869 |
| H | 4.934197989  | 0.091016624  | -0.251137384 |
| H | 4.449908730  | 1.793978876  | -0.209514487 |
| H | 2.698157517  | 1.781538660  | -2.758419040 |
| H | 2.183992289  | 2.535014396  | -1.252007355 |
| H | 1.147714024  | 1.338578950  | -2.021176787 |
| H | 2.219269546  | 3.411488510  | 2.128744041  |
| H | 1.293726103  | 2.889910280  | 0.716544240  |
| H | 3.067836727  | 2.938946292  | 0.662222036  |
| H | 1.203247420  | 1.995687559  | 3.615688167  |
| H | 1.020908494  | 0.258100324  | 3.410456493  |
| H | 0.109134627  | 1.362825438  | 2.380558764  |
| H | 3.686090859  | 1.900892183  | 3.347916799  |
| H | 4.438921316  | 1.127087531  | 1.947363989  |
| H | 3.611932317  | 0.149796802  | 3.169559353  |
| H | -0.813050647 | -0.083691789 | 0.677056709  |
| H | 0.330096814  | -2.642513846 | -3.672699231 |
| H | -0.789480648 | -4.753442953 | -2.979239670 |
| H | -2.440568526 | -4.706186732 | -1.123358092 |
| H | -2.949317166 | -2.595613931 | 0.032455973  |
| H | -0.176899548 | -0.538642871 | -2.507909627 |
| H | -2.103747423 | -1.415543728 | 2.158639821  |
| H | -3.953423459 | -1.382552220 | 3.786852393  |
| H | -5.958236152 | 0.025226813  | 3.369839962  |
| H | -6.076336287 | 1.408039639  | 1.308304416  |
| H | -4.210071050 | 1.396788891  | -0.302046700 |
| H | -2.105778214 | 0.724986360  | -3.024541751 |
| H | -1.057080895 | 2.394137901  | 0.779438102  |
| H | -1.707328957 | 2.905533432  | -4.091730525 |
| H | -0.935235886 | 4.841348079  | -2.740633083 |
| H | -0.626694759 | 4.572780602  | -0.285455928 |

### 3\_ 'Bu<sub>3</sub>P/BPh<sub>3</sub>

Total number of atoms = 76

|   |              |              |              |
|---|--------------|--------------|--------------|
| P | -2.097253072 | -0.043774168 | -0.461297913 |
| C | -2.398823027 | -1.822777662 | -1.000428926 |
| C | -1.819863230 | -2.034676331 | -2.412575300 |
| C | -1.619324536 | -2.779818529 | -0.075478967 |
| C | -3.894135807 | -2.179340956 | -0.998498065 |
| C | -2.936805543 | 0.421261614  | 1.158615161  |
| C | -2.893642073 | -0.758431325 | 2.147570338  |
| C | -4.408316412 | 0.815558787  | 0.943693859  |
| C | -2.147100905 | 1.581127106  | 1.805260189  |
| C | -2.401090477 | 1.208512255  | -1.843289965 |
| C | -2.354285311 | 2.641543113  | -1.279783009 |
| C | -1.251702814 | 1.095265387  | -2.871653795 |
| C | -3.754794316 | 0.993359920  | -2.538692626 |
| B | 1.750534370  | 0.017681774  | -0.005304541 |
| C | 3.194343405  | 0.003799492  | -0.752272514 |
| C | 4.347975507  | 0.540746206  | -0.159560334 |
| C | 5.592032227  | 0.493016510  | -0.784051800 |
| C | 5.725183108  | -0.100367946 | -2.037998837 |
| C | 4.599531526  | -0.637338689 | -2.656027651 |
| C | 3.360718946  | -0.577204036 | -2.018742467 |
| C | 1.481503059  | 1.448215921  | 0.729637937  |
| C | 1.728442310  | 1.708056216  | 2.088446662  |
| C | 1.483854711  | 2.952997026  | 2.669905990  |
| C | 0.992484434  | 4.004003689  | 1.900398292  |
| C | 0.781210702  | 3.797637941  | 0.538520086  |
| C | 1.025157864  | 2.545099674  | -0.021652849 |
| C | 1.523816295  | -1.302972418 | 0.935022087  |
| C | 2.053279839  | -2.549198113 | 0.549448310  |
| C | 1.777612437  | -3.727180950 | 1.238860841  |
| C | 0.962596739  | -3.708048048 | 2.370535437  |
| C | 0.441658570  | -2.491478385 | 2.798159778  |
| C | 0.717779715  | -1.321919140 | 2.086273205  |
| H | -0.702627504 | 0.025978514  | -0.243145755 |
| H | -1.868525305 | -3.107346971 | -2.629883217 |
| H | -0.768605404 | -1.735940589 | -2.472254676 |
| H | -2.389356014 | -1.523217902 | -3.191128364 |
| H | -1.752932040 | -3.794090762 | -0.469204302 |
| H | -1.969821133 | -2.784273744 | 0.954201838  |
| H | -0.547936330 | -2.562662974 | -0.068019645 |



|   |              |              |              |
|---|--------------|--------------|--------------|
| H | -4.004410044 | -3.196608241 | -1.391355053 |
| H | -4.492419158 | -1.516830116 | -1.630739170 |
| H | -4.322125878 | -2.174843221 | 0.007154340  |
| H | -3.280891166 | -0.395912885 | 3.106483714  |
| H | -1.878851411 | -1.123876130 | 2.315794394  |
| H | -3.528211256 | -1.592220868 | 1.838982819  |
| H | -4.857643461 | 1.007639179  | 1.924610642  |
| H | -4.988078812 | 0.018159700  | 0.467914217  |
| H | -4.523081849 | 1.726805486  | 0.353160658  |
| H | -2.563758571 | 1.749782341  | 2.804887999  |
| H | -2.223997949 | 2.520247469  | 1.259926351  |
| H | -1.083267881 | 1.351437269  | 1.919043224  |
| H | -2.417026748 | 3.332006616  | -2.128347269 |
| H | -1.419290058 | 2.847056277  | -0.754036711 |
| H | -3.193715288 | 2.869397083  | -0.620394621 |
| H | -1.281682437 | 1.984855248  | -3.510620285 |
| H | -1.348750060 | 0.228008858  | -3.523632033 |
| H | -0.267772131 | 1.054845752  | -2.395572648 |
| H | -3.880083591 | 1.778143074  | -3.293572253 |
| H | -4.598960290 | 1.063329629  | -1.846274915 |
| H | -3.811948221 | 0.034140725  | -3.058409264 |
| H | 0.907729577  | -0.080231362 | -0.924000500 |
| H | -0.178334488 | -2.448746919 | 3.692237144  |
| H | 0.753645274  | -4.623886977 | 2.917012577  |
| H | 2.209155703  | -4.665338708 | 0.897509497  |
| H | 2.702218839  | -2.591442265 | -0.322600403 |
| H | 0.296441796  | -0.388646295 | 2.453953343  |
| H | 2.488263317  | -1.001946192 | -2.516019598 |
| H | 4.685971573  | -1.098623126 | -3.637512220 |
| H | 6.694283575  | -0.139118723 | -2.528743442 |
| H | 6.462042872  | 0.923539481  | -0.293310252 |
| H | 4.265664205  | 1.020072923  | 0.814648714  |
| H | 2.127385337  | 0.913237125  | 2.714817363  |
| H | 0.881913095  | 2.413128169  | -1.093537799 |
| H | 1.684256994  | 3.103846137  | 3.728092585  |
| H | 0.801136655  | 4.975084580  | 2.349072134  |
| H | 0.434338462  | 4.616576989  | -0.089044152 |

### TS13\_PB<sup>b</sup>

Total number of atoms = 55

|   |              |              |              |
|---|--------------|--------------|--------------|
| C | -0.211363506 | -0.508035182 | -0.891567771 |
| P | -1.647622472 | -0.374178294 | 0.241829993  |
| C | -2.863595551 | 0.940750053  | -0.328221793 |

|   |              |              |              |
|---|--------------|--------------|--------------|
| C | -3.728343002 | 0.491279169  | -1.513145071 |
| C | -3.753967059 | 1.335788108  | 0.863417010  |
| C | -2.045470203 | 2.179283238  | -0.738274687 |
| C | -2.382548236 | -2.099678121 | 0.366005849  |
| C | -2.680544559 | -2.755093930 | -0.990394232 |
| C | -3.654834374 | -2.093504488 | 1.225291833  |
| C | -1.300604346 | -2.923107225 | 1.097016926  |
| B | 1.081943515  | -0.073353814 | 0.035515669  |
| C | 1.260903254  | 1.521907067  | 0.122935863  |
| C | 1.083821479  | 2.259543795  | 1.300311965  |
| C | 1.570127268  | 2.247257305  | -1.038608480 |
| C | 1.188542634  | 3.651146730  | 1.321501223  |
| C | 1.680018894  | 3.634117533  | -1.031543861 |
| C | 1.482019562  | 4.344478923  | 0.152049238  |
| C | 2.428100692  | -0.938945183 | -0.058477390 |
| C | 3.615315319  | -0.458535672 | 0.520518302  |
| C | 2.490234888  | -2.204670584 | -0.660571162 |
| C | 4.793173303  | -1.199037499 | 0.507279289  |
| C | 3.665117886  | -2.953898680 | -0.686604379 |
| C | 4.822922380  | -2.453003180 | -0.099490656 |
| H | -0.322224677 | 0.154216639  | -1.755410948 |
| H | -0.147040014 | -1.526788545 | -1.283921332 |
| H | 0.635248217  | -0.370296460 | 1.330431037  |
| H | -0.343605947 | -0.224826660 | 1.328224909  |
| H | -4.319123036 | 1.343218610  | -1.873093674 |
| H | -3.117616413 | 0.132009335  | -2.348623064 |
| H | -4.432104093 | -0.298400129 | -1.232093969 |
| H | -3.152009637 | 1.684493779  | 1.709318361  |
| H | -4.414914752 | 2.157140811  | 0.560019452  |
| H | -4.387861234 | 0.515034820  | 1.208683676  |
| H | -2.743150262 | 2.994817530  | -0.965300357 |
| H | -1.373258448 | 2.517858023  | 0.055934839  |
| H | -1.440522084 | 2.003259071  | -1.631790523 |
| H | -3.018888013 | -3.785599768 | -0.823157287 |
| H | -3.467933783 | -2.233640935 | -1.539927719 |
| H | -1.793760728 | -2.801991315 | -1.629357229 |
| H | -4.496315568 | -1.619860751 | 0.710019461  |
| H | -3.946146392 | -3.128351509 | 1.443468732  |
| H | -3.500519682 | -1.582533796 | 2.182368134  |
| H | -0.344923219 | -2.931758253 | 0.561699155  |
| H | -1.116048470 | -2.536694930 | 2.105143286  |
| H | -1.638971513 | -3.962374710 | 1.190699416  |
| H | 1.563915360  | 5.427812993  | 0.161400022  |
| H | 1.920089285  | 4.164050542  | -1.949754921 |
| H | 1.039707882  | 4.190910080  | 2.253186029  |
| H | 0.853401980  | 1.734729716  | 2.226497204  |
| H | 1.728170218  | 1.711448542  | -1.973797099 |

|   |             |              |              |
|---|-------------|--------------|--------------|
| H | 1.604188751 | -2.623928753 | -1.132914706 |
| H | 3.676617585 | -3.928115596 | -1.168595105 |
| H | 5.742473438 | -3.031697129 | -0.117831556 |
| H | 5.692083193 | -0.795174577 | 0.965799699  |
| H | 3.611501345 | 0.522223684  | 0.991079770  |

### 3PB<sup>b</sup>

Total number of atoms = 55

|   |              |              |              |
|---|--------------|--------------|--------------|
| C | -0.015519019 | -0.749427818 | 0.625324127  |
| P | -1.627812609 | -0.425938531 | -0.065784159 |
| C | -2.407361293 | -1.962216008 | -0.773659351 |
| C | -3.052263953 | -2.806122076 | 0.335266975  |
| C | -3.450104201 | -1.580323017 | -1.838132161 |
| C | -1.295069763 | -2.779018186 | -1.460414858 |
| C | -2.689681006 | 0.596377669  | 1.070450124  |
| C | -2.786422738 | -0.046814794 | 2.462353208  |
| C | -4.092691114 | 0.818456777  | 0.489373218  |
| C | -1.971170318 | 1.957124558  | 1.184612812  |
| B | 1.150063094  | -0.274947055 | -0.503852562 |
| C | 2.602103610  | -0.833221207 | -0.062572215 |
| C | 3.602275884  | -1.021606198 | -1.031044699 |
| C | 2.965189402  | -1.110578965 | 1.263505667  |
| C | 4.883674630  | -1.452754280 | -0.701744144 |
| C | 4.244948323  | -1.544319629 | 1.611070846  |
| C | 5.212332536  | -1.717442070 | 0.627200425  |
| C | 1.086761629  | 1.349283127  | -0.589610209 |
| C | 0.508467226  | 2.022145324  | -1.677123762 |
| C | 1.525025840  | 2.155655057  | 0.474649584  |
| C | 0.333890959  | 3.407930593  | -1.692365171 |
| C | 1.363482549  | 3.538464795  | 0.475219000  |
| C | 0.752373815  | 4.172232169  | -0.606953610 |
| H | 0.060309702  | -1.814304194 | 0.870833431  |
| H | 0.086702630  | -0.183114571 | 1.557327238  |
| H | 0.832012440  | -0.738625553 | -1.600364643 |
| H | -1.479824298 | 0.417241013  | -1.175186349 |
| H | -3.385931361 | -3.758287424 | -0.092659493 |
| H | -2.344284315 | -3.035065510 | 1.139482507  |
| H | -3.928735569 | -2.316328926 | 0.770158618  |
| H | -3.004523636 | -0.981341638 | -2.639695957 |
| H | -3.841222245 | -2.498653131 | -2.291128957 |
| H | -4.299340273 | -1.030632227 | -1.426756216 |
| H | -1.757075046 | -3.657370672 | -1.926294965 |
| H | -0.780725430 | -2.204394968 | -2.234816428 |
| H | -0.536905445 | -3.129826913 | -0.755933790 |
| H | -3.339080745 | 0.629859756  | 3.124322393  |

|   |              |              |              |
|---|--------------|--------------|--------------|
| H | -3.317601794 | -1.002520582 | 2.447669859  |
| H | -1.799066918 | -0.209372649 | 2.905207178  |
| H | -4.687494730 | -0.100036837 | 0.479478890  |
| H | -4.622986646 | 1.543930890  | 1.117014461  |
| H | -4.056700823 | 1.227467079  | -0.526550055 |
| H | -0.972953511 | 1.868221642  | 1.620988533  |
| H | -1.855603750 | 2.452488836  | 0.214882587  |
| H | -2.566888277 | 2.609082962  | 1.834198630  |
| H | 6.210947856  | -2.056868093 | 0.889717699  |
| H | 4.484696265  | -1.747019698 | 2.652461792  |
| H | 5.629510341  | -1.586159156 | -1.481995315 |
| H | 3.361983425  | -0.820649650 | -2.073881605 |
| H | 2.231351556  | -0.985071966 | 2.059828796  |
| H | 2.012399498  | 1.680103732  | 1.325703105  |
| H | 1.717048145  | 4.127148495  | 1.318489820  |
| H | 0.621617179  | 5.251045491  | -0.610414835 |
| H | -0.121920188 | 3.889529692  | -2.554582610 |
| H | 0.195701676  | 1.440383106  | -2.543914010 |

### TS13\_PB<sup>c</sup>

Total number of atoms = 56

|   |              |              |              |
|---|--------------|--------------|--------------|
| C | 0.188185537  | 0.495294411  | 0.710633000  |
| P | 1.669791046  | 0.308216189  | -0.342970391 |
| C | 2.537807922  | 1.974858904  | -0.462531654 |
| C | 3.409835011  | 2.323913139  | 0.749349272  |
| C | 3.381519237  | 1.997047084  | -1.749821283 |
| C | 1.426245254  | 3.032505320  | -0.601282949 |
| C | 2.776854736  | -1.080234940 | 0.286709817  |
| C | 3.028004257  | -0.997905148 | 1.799214839  |
| C | 4.112178178  | -1.079687660 | -0.472107756 |
| C | 2.038149256  | -2.395448027 | -0.019737400 |
| B | -1.103078426 | 0.086396358  | -0.188234569 |
| C | -2.421087700 | 0.987545916  | -0.079726594 |
| C | -2.359916278 | 2.362189035  | 0.200611186  |
| C | -3.696428422 | 0.438291414  | -0.285776169 |
| C | -3.505037637 | 3.150535032  | 0.269930258  |
| C | -4.849708748 | 1.216415984  | -0.215914301 |
| C | -4.757365737 | 2.577620220  | 0.062037549  |
| C | -1.321184812 | -1.507258791 | -0.228095612 |
| C | -1.296871293 | -2.260901848 | -1.407569449 |
| C | -1.536731892 | -2.203735195 | 0.970933674  |
| C | -1.462944710 | -3.645496411 | -1.396630889 |
| C | -1.710411990 | -3.584449229 | 0.994783226  |
| C | -1.666796830 | -4.313126630 | -0.193102226 |
| C | 0.171724904  | 0.886332369  | 1.989681236  |

|   |              |              |              |
|---|--------------|--------------|--------------|
| H | -0.626832408 | 0.340461824  | -1.479343043 |
| H | 0.347620668  | 0.189469555  | -1.439748554 |
| H | 3.801599609  | 3.342506578  | 0.631738435  |
| H | 2.837595529  | 2.295881088  | 1.682104900  |
| H | 4.267954197  | 1.652494208  | 0.848093234  |
| H | 2.767162367  | 1.783393479  | -2.631233364 |
| H | 3.816929814  | 2.996051422  | -1.877366630 |
| H | 4.205527298  | 1.280163519  | -1.727845324 |
| H | 1.882574266  | 3.996936964  | -0.855764687 |
| H | 0.710147644  | 2.780757691  | -1.391933200 |
| H | 0.872269781  | 3.152497115  | 0.332513191  |
| H | 3.665536513  | -1.839097248 | 2.100190819  |
| H | 3.535731395  | -0.074933442 | 2.093872711  |
| H | 2.090123322  | -1.072284685 | 2.356145061  |
| H | 4.738040875  | -0.219761072 | -0.214968915 |
| H | 4.671648408  | -1.983642718 | -0.201958189 |
| H | 3.965459775  | -1.094317557 | -1.557897300 |
| H | 1.081988759  | -2.463131082 | 0.505451629  |
| H | 1.840733871  | -2.513748895 | -1.089866459 |
| H | 2.664533552  | -3.235146053 | 0.306991390  |
| H | -5.655198762 | 3.187331911  | 0.118148849  |
| H | -5.822317304 | 0.758456218  | -0.376077258 |
| H | -3.420936552 | 4.212251185  | 0.487718879  |
| H | -1.392002485 | 2.826521400  | 0.371198434  |
| H | -3.786822744 | -0.623915982 | -0.499864506 |
| H | -1.553561684 | -1.651323827 | 1.909020522  |
| H | -1.874146868 | -4.094530946 | 1.940492530  |
| H | -1.794852050 | -5.391936274 | -0.178908896 |
| H | -1.431934055 | -4.202017748 | -2.329837413 |
| H | -1.139388483 | -1.754933921 | -2.358901322 |
| H | 1.064350967  | 1.105417595  | 2.573458248  |
| H | -0.777118200 | 1.013075298  | 2.510578315  |

### 3PB<sup>c</sup>

Total number of atoms = 56

|   |              |              |              |
|---|--------------|--------------|--------------|
| C | -0.053166101 | -0.641667520 | 0.517096113  |
| B | -1.184476607 | -0.084058354 | -0.553819699 |
| P | 1.605196611  | -0.414080587 | -0.124568701 |
| C | 2.746898322  | 0.615495791  | 0.931461716  |
| C | 4.120881738  | 0.753587715  | 0.258781190  |
| C | 2.084890857  | 2.003393191  | 1.024469484  |
| C | 2.901948691  | 0.045813151  | 2.349075764  |
| C | 2.306003032  | -2.019344835 | -0.776848817 |
| C | 3.009372025  | -2.804042908 | 0.339201799  |
| C | 1.126010407  | -2.851359592 | -1.314459010 |

|   |              |              |              |
|---|--------------|--------------|--------------|
| C | 3.274944402  | -1.733490622 | -1.936075558 |
| C | -1.035019268 | 1.536042168  | -0.576294185 |
| C | -1.292698966 | 2.317208165  | 0.563331893  |
| C | -0.565564274 | 2.224070039  | -1.705441214 |
| C | -1.092652660 | 3.695046576  | 0.582196593  |
| C | -0.345812254 | 3.603030835  | -1.700449947 |
| C | -0.606109022 | 4.344892850  | -0.551392692 |
| C | -2.648296417 | -0.673284169 | -0.186977051 |
| C | -3.754782479 | 0.115886614  | 0.156286008  |
| C | -2.865967576 | -2.062157678 | -0.220599441 |
| C | -4.998339157 | -0.441174533 | 0.459890966  |
| C | -4.097978846 | -2.633492352 | 0.080700507  |
| C | -5.175572716 | -1.820174328 | 0.428716467  |
| C | -0.232774872 | -1.257917500 | 1.693947145  |
| H | 4.713154215  | 1.482238626  | 0.824090263  |
| H | 4.039917487  | 1.123317081  | -0.769542947 |
| H | 4.679257931  | -0.187273137 | 0.253116574  |
| H | 2.740015158  | 2.659788253  | 1.609403166  |
| H | 1.114147057  | 1.956804453  | 1.522317973  |
| H | 1.925726497  | 2.463875428  | 0.043648925  |
| H | 3.566381655  | 0.707354690  | 2.917038221  |
| H | 3.341680522  | -0.955264960 | 2.362846654  |
| H | 1.942080987  | 0.017255822  | 2.870859294  |
| H | 3.914949047  | -2.303073180 | 0.693933629  |
| H | 3.306085971  | -3.783567342 | -0.052881649 |
| H | 2.344806513  | -2.979360624 | 1.192358280  |
| H | 1.528826088  | -3.766026527 | -1.765195632 |
| H | 0.553579018  | -2.312083181 | -2.074537869 |
| H | 0.433965681  | -3.132087081 | -0.516821177 |
| H | 4.152969719  | -1.160967151 | -1.628503736 |
| H | 2.776881422  | -1.195747844 | -2.750042935 |
| H | 3.629684978  | -2.688671178 | -2.340365067 |
| H | -1.649483418 | 1.824120427  | 1.467096506  |
| H | -0.375963022 | 1.660289006  | -2.618420947 |
| H | -1.308450570 | 4.263479307  | 1.483818753  |
| H | 0.020753340  | 4.098231724  | -2.596634867 |
| H | -0.441239012 | 5.419003625  | -0.541045900 |
| H | -3.649102985 | 1.197926439  | 0.176656039  |
| H | -2.039937065 | -2.715390991 | -0.501144861 |
| H | -5.831405813 | 0.208343448  | 0.718778632  |
| H | -4.223266496 | -3.713110758 | 0.038094267  |
| H | -6.142154423 | -2.258194949 | 0.663338694  |
| H | 0.564268791  | -1.615893839 | 2.344136495  |
| H | -1.248096324 | -1.447398676 | 2.037460553  |
| H | 1.459165339  | 0.379213134  | -1.268168833 |
| H | -0.832053541 | -0.513795771 | -1.657763874 |

**TS13\_PB<sup>d</sup>**

Total number of atoms = 69

|   |              |              |              |
|---|--------------|--------------|--------------|
| C | 0.811768827  | -0.835432130 | 0.852378182  |
| B | 2.133000217  | -0.527876781 | -0.075721209 |
| C | 3.336213579  | -1.581085677 | -0.038931275 |
| C | 3.396168613  | -2.654217744 | 0.859983969  |
| C | 4.401607062  | -1.450896377 | -0.946016899 |
| C | 4.460380502  | -3.556703272 | 0.856068223  |
| C | 5.459427720  | -2.352790624 | -0.970930441 |
| C | 5.492661729  | -3.412406743 | -0.065116332 |
| C | 2.553197537  | 1.022764492  | -0.108727480 |
| C | 1.993797482  | 1.972869844  | -0.973946855 |
| C | 3.458204853  | 1.497732103  | 0.855255730  |
| C | 2.281569803  | 3.332072256  | -0.860011258 |
| C | 3.755612805  | 2.852406331  | 0.977511196  |
| C | 3.158606167  | 3.778278943  | 0.123549821  |
| P | -0.616090496 | -0.323637923 | -0.175304150 |
| C | -1.224893680 | 1.394535767  | -0.075925857 |
| C | -2.023664962 | 1.784126267  | -1.177529534 |
| C | -0.898212684 | 2.343944785  | 0.914998220  |
| C | -2.488832379 | 3.095281460  | -1.255346811 |
| C | -1.381603596 | 3.645534866  | 0.782148075  |
| C | -2.177528551 | 4.044421107  | -0.286966620 |
| C | -2.003514076 | -1.493183191 | 0.068670676  |
| C | -3.040889743 | -1.313759771 | 1.008100008  |
| C | -1.994977949 | -2.639403846 | -0.755209145 |
| C | -4.055640389 | -2.266382095 | 1.080091998  |
| C | -3.029908008 | -3.567972091 | -0.639839807 |
| C | -4.074436846 | -3.394893937 | 0.262547754  |
| C | -0.898350894 | -2.904413847 | -1.762565241 |
| C | -5.201470231 | -4.391139935 | 0.357490744  |
| C | -3.089900545 | -0.145476681 | 1.960649607  |
| C | -0.040185835 | 2.045212451  | 2.117163695  |
| C | -2.703569971 | 5.453506018  | -0.380550255 |
| C | -2.394868842 | 0.831527079  | -2.290777308 |
| H | 0.652738729  | -1.915065787 | 0.980125245  |
| H | 0.866341496  | -0.396872643 | 1.849043283  |
| H | 2.602668093  | -2.789149248 | 1.592432952  |
| H | 4.395309882  | -0.619890437 | -1.649182803 |
| H | 4.480736274  | -4.372518879 | 1.574026562  |
| H | 6.261665608  | -2.229521943 | -1.693829493 |
| H | 6.318875939  | -4.117985668 | -0.076236355 |
| H | 1.304062888  | 1.651744248  | -1.752817769 |
| H | 3.934580906  | 0.787045095  | 1.528297805  |
| H | 1.815676488  | 4.040831244  | -1.539298183 |
| H | 4.456951906  | 3.186556100  | 1.737652286  |

|   |              |              |              |
|---|--------------|--------------|--------------|
| H | 3.383222314  | 4.836913941  | 0.219597321  |
| H | -3.103307488 | 3.384070415  | -2.105417315 |
| H | -1.118968500 | 4.375229790  | 1.544772429  |
| H | -4.851777867 | -2.128855454 | 1.809153418  |
| H | -3.016400744 | -4.451165213 | -1.274761490 |
| H | -0.871287195 | -2.131385057 | -2.538735357 |
| H | 0.095473054  | -2.932831096 | -1.300101781 |
| H | -1.056687574 | -3.868457181 | -2.253787963 |
| H | -4.952666224 | -5.328374020 | -0.148672219 |
| H | -5.439589509 | -4.619950630 | 1.401552865  |
| H | -6.111965563 | -3.993006809 | -0.105842030 |
| H | -2.133668932 | -0.013934471 | 2.476025041  |
| H | -3.313168640 | 0.794245659  | 1.446420534  |
| H | -3.857671829 | -0.305723092 | 2.722819684  |
| H | -0.386128712 | 1.161761996  | 2.661657882  |
| H | 1.001421609  | 1.878165793  | 1.826625610  |
| H | -0.058360010 | 2.887716074  | 2.813540386  |
| H | -2.893891379 | 5.738588114  | -1.419800661 |
| H | -3.648268621 | 5.554489659  | 0.167333820  |
| H | -1.996736817 | 6.171699168  | 0.046590525  |
| H | -1.504538610 | 0.379799061  | -2.744066553 |
| H | -3.028671120 | 0.011057094  | -1.935389475 |
| H | -2.941171121 | 1.358524425  | -3.077798844 |
| H | 0.662635789  | -0.566547538 | -1.318117797 |
| H | 1.608316602  | -0.727584799 | -1.384943947 |

### 3PB<sup>d</sup>

Total number of atoms = 69

|   |              |              |              |
|---|--------------|--------------|--------------|
| C | 0.755451222  | -1.278423739 | 0.558385872  |
| B | 2.023198519  | -1.117788076 | -0.544933028 |
| C | 3.360918837  | -1.824182463 | 0.029409891  |
| C | 3.653072437  | -1.991442644 | 1.390677087  |
| C | 4.342296597  | -2.269989034 | -0.872663293 |
| C | 4.846777102  | -2.564178801 | 1.833400515  |
| C | 5.538459405  | -2.839707173 | -0.448807882 |
| C | 5.797254052  | -2.991456293 | 0.912969790  |
| C | 2.229954455  | 0.466032254  | -0.867304217 |
| C | 1.724913562  | 1.060118620  | -2.035099016 |
| C | 2.818415075  | 1.338826266  | 0.063260172  |
| C | 1.730382421  | 2.441190018  | -2.233845562 |
| C | 2.831870136  | 2.718903515  | -0.117168916 |
| C | 2.267241473  | 3.280110270  | -1.262094151 |
| P | -0.661142753 | -0.407715343 | -0.109968202 |
| C | -0.864067167 | 1.365808615  | 0.220553013  |
| C | -1.518803581 | 2.104386590  | -0.791891589 |



|   |              |              |              |
|---|--------------|--------------|--------------|
| C | -0.379881555 | 2.020232921  | 1.370749012  |
| C | -1.664566540 | 3.479748750  | -0.635294562 |
| C | -0.550007068 | 3.399909270  | 1.470952301  |
| C | -1.174629845 | 4.149894052  | 0.480767248  |
| C | -2.230253789 | -1.329476492 | 0.020699155  |
| C | -3.213168147 | -1.071627056 | 0.996546857  |
| C | -2.422718962 | -2.363301974 | -0.926067799 |
| C | -4.377946357 | -1.839201998 | 0.991992098  |
| C | -3.604246884 | -3.099776724 | -0.882918971 |
| C | -4.595516390 | -2.852859079 | 0.063562193  |
| C | -1.411657452 | -2.701736119 | -1.999547530 |
| C | -5.850747021 | -3.685355176 | 0.097520144  |
| C | -3.073159713 | -0.005231203 | 2.055379100  |
| C | 0.333412989  | 1.337670999  | 2.511337520  |
| C | -1.286338311 | 5.646731718  | 0.598260242  |
| C | -2.048117834 | 1.481745359  | -2.062432061 |
| H | 0.452941518  | -2.327229867 | 0.666490674  |
| H | 0.995338582  | -0.903372509 | 1.552337824  |
| H | 2.931857511  | -1.670788952 | 2.142204023  |
| H | 4.155429249  | -2.159025253 | -1.939513616 |
| H | 5.030568386  | -2.679727298 | 2.899192992  |
| H | 6.271409662  | -3.171345315 | -1.180588569 |
| H | 6.727577699  | -3.440570437 | 1.250608089  |
| H | 1.313657047  | 0.414061994  | -2.811570160 |
| H | 3.280318634  | 0.915558799  | 0.955179461  |
| H | 1.315637270  | 2.862180188  | -3.147180003 |
| H | 3.283956017  | 3.361766097  | 0.634685168  |
| H | 2.267636779  | 4.357611260  | -1.404372839 |
| H | -2.165944126 | 4.044571403  | -1.417706670 |
| H | -0.170525400 | 3.904989100  | 2.355950832  |
| H | -5.136844278 | -1.638212663 | 1.744652610  |
| H | -3.752886855 | -3.892566130 | -1.612585806 |
| H | -1.394825845 | -1.938640866 | -2.788450136 |
| H | -0.387774159 | -2.793852187 | -1.622140329 |
| H | -1.672634219 | -3.650943510 | -2.474081935 |
| H | -6.208009495 | -3.905427010 | -0.913384209 |
| H | -5.665192534 | -4.644068597 | 0.596001477  |
| H | -6.653539222 | -3.178244037 | 0.640688405  |
| H | -2.125819174 | -0.090479461 | 2.594967044  |
| H | -3.120390533 | 1.001552405  | 1.629536790  |
| H | -3.874576097 | -0.097260337 | 2.793122282  |
| H | -0.132964663 | 0.396678342  | 2.813528194  |
| H | 1.371835497  | 1.126824588  | 2.236790977  |
| H | 0.347323812  | 1.990404187  | 3.388180639  |
| H | -2.168011006 | 6.026605344  | 0.073345536  |
| H | -1.345414234 | 5.963482730  | 1.643940591  |
| H | -0.405061241 | 6.127015727  | 0.156466739  |

|   |              |              |              |
|---|--------------|--------------|--------------|
| H | -1.220933515 | 1.204807465  | -2.728786758 |
| H | -2.653886162 | 0.587536830  | -1.880004133 |
| H | -2.675037848 | 2.196938409  | -2.600594164 |
| H | -0.450812308 | -0.411927610 | -1.485529223 |
| H | 1.649185148  | -1.684411725 | -1.574913642 |

### TS13\_PB<sup>e</sup>

Total number of atoms = 73

|   |              |              |              |
|---|--------------|--------------|--------------|
| C | 1.140269028  | -0.649140050 | -0.936235109 |
| B | 2.486891045  | -0.892268766 | 0.018804500  |
| P | -0.191871681 | -0.131389305 | 0.207327296  |
| C | 2.727565179  | -2.507406285 | 0.281127051  |
| C | 3.728919223  | 0.169601434  | -0.227326263 |
| C | -1.817720836 | -0.989468448 | 0.091449784  |
| C | -4.362320898 | -2.234102335 | 0.204045137  |
| C | -2.686553184 | -0.769263917 | 1.190506177  |
| C | -2.228257982 | -1.867686162 | -0.936799900 |
| C | -3.490600556 | -2.463345320 | -0.851956036 |
| C | -3.935015953 | -1.382973715 | 1.219182855  |
| C | -0.486325747 | 1.670669771  | 0.003262744  |
| C | -0.897731894 | 4.452525203  | -0.257537790 |
| C | -0.037655184 | 2.553866179  | 1.012118721  |
| C | -1.125843234 | 2.193372539  | -1.141287673 |
| C | -1.323065751 | 3.569401023  | -1.245336566 |
| C | -0.257866379 | 3.923015287  | 0.858583793  |
| C | 4.522813281  | 0.451266550  | 1.063442180  |
| C | 3.216815833  | 1.536675275  | -0.725820491 |
| C | 4.712870116  | -0.351620249 | -1.291981740 |
| C | 3.012496058  | -3.267333736 | -1.030999820 |
| C | 1.457914640  | -3.132740096 | 0.899833907  |
| C | 3.878796844  | -2.808481269 | 1.254199577  |
| C | -2.307785967 | 0.099476402  | 2.365819560  |
| C | -1.401432118 | -2.242106021 | -2.145797050 |
| C | 0.701943924  | 2.105568978  | 2.252365905  |
| C | -1.587904038 | 1.323938898  | -2.283134981 |
| C | -5.724707431 | -2.874994389 | 0.257934801  |
| C | -1.089141031 | 5.939397874  | -0.408298337 |
| H | -3.798821250 | -3.134703353 | -1.650315269 |
| H | -4.590475053 | -1.196962512 | 2.067352529  |
| H | -1.817243746 | 3.962566749  | -2.131147748 |
| H | 0.088980671  | 4.598877125  | 1.637029751  |
| H | 5.337514917  | 1.164631797  | 0.869485003  |
| H | 4.971557800  | -0.450049976 | 1.487596664  |
| H | 3.880506070  | 0.891866608  | 1.837336178  |
| H | 2.808719118  | 1.482607446  | -1.741832256 |

|   |              |              |              |
|---|--------------|--------------|--------------|
| H | 4.035666974  | 2.270008095  | -0.750863141 |
| H | 2.430876019  | 1.948700012  | -0.082079169 |
| H | 4.199412705  | -0.600871667 | -2.229916153 |
| H | 5.244679714  | -1.247482659 | -0.954631519 |
| H | 5.471360450  | 0.410660901  | -1.524999091 |
| H | 2.205027906  | -3.151637033 | -1.765646200 |
| H | 3.114890522  | -4.345070479 | -0.835986522 |
| H | 3.938095789  | -2.932848453 | -1.508387743 |
| H | 0.572844421  | -3.028286562 | 0.258221897  |
| H | 1.218433778  | -2.679072288 | 1.870775672  |
| H | 1.596844997  | -4.210292325 | 1.069475993  |
| H | 4.849634356  | -2.507524810 | 0.846661684  |
| H | 3.937713903  | -3.886527363 | 1.466001136  |
| H | 3.740661930  | -2.291411797 | 2.212083005  |
| H | -3.088188478 | 0.067441658  | 3.130636697  |
| H | -2.168105274 | 1.146987327  | 2.078011995  |
| H | -1.376248023 | -0.248276308 | 2.826295595  |
| H | -2.037153678 | -2.720129851 | -2.896068953 |
| H | -0.616111970 | -2.960254900 | -1.883960493 |
| H | -0.923043536 | -1.382702115 | -2.616942982 |
| H | 1.678348394  | 1.675764454  | 2.006141816  |
| H | 0.150567436  | 1.351273478  | 2.819930993  |
| H | 0.877756833  | 2.957126136  | 2.915010912  |
| H | -2.000561517 | 1.935563193  | -3.089894486 |
| H | -2.359016672 | 0.613399843  | -1.970491706 |
| H | -0.754391546 | 0.748637762  | -2.699489514 |
| H | 2.047837926  | -0.506967569 | 1.287034279  |
| H | 1.044535231  | -0.396054119 | 1.286162831  |
| H | -5.842734963 | -3.632216259 | -0.522523855 |
| H | -6.513599793 | -2.126020483 | 0.121813016  |
| H | -5.895331559 | -3.356320723 | 1.226851275  |
| H | -0.213581071 | 6.394417173  | -0.886674916 |
| H | -1.221750887 | 6.424672604  | 0.563609849  |
| H | -1.961110187 | 6.169992784  | -1.027934461 |
| H | 0.866419830  | -1.580688567 | -1.424545050 |
| H | 1.269345903  | 0.100679823  | -1.721282032 |

### 3PB<sup>c</sup>

Total number of atoms = 73

|   |              |              |              |
|---|--------------|--------------|--------------|
| C | 0.842080995  | -1.268114381 | -0.584259150 |
| B | 2.376303429  | -0.961481509 | 0.083628847  |
| P | -0.392047784 | -0.351437080 | 0.313715824  |
| C | 2.806067412  | -2.234115448 | 1.078663162  |
| C | 3.360713389  | -0.476103819 | -1.174419931 |
| C | -2.166332965 | -0.775898923 | 0.090108990  |

|   |              |              |              |
|---|--------------|--------------|--------------|
| C | -4.928738438 | -1.343694160 | -0.123831949 |
| C | -3.076724154 | -0.302899108 | 1.066701407  |
| C | -2.650496957 | -1.553641383 | -0.987810166 |
| C | -4.020465163 | -1.811371834 | -1.066611558 |
| C | -4.433014241 | -0.591671777 | 0.935822441  |
| C | -0.170248079 | 1.449164809  | 0.187920002  |
| C | 0.251608657  | 4.219586769  | -0.063451040 |
| C | 0.374516995  | 2.176595623  | 1.270865810  |
| C | -0.508298305 | 2.110098315  | -1.011922147 |
| C | -0.289194603 | 3.480643704  | -1.112149250 |
| C | 0.569592682  | 3.549372996  | 1.112606104  |
| C | 4.819698067  | -0.281140960 | -0.730786230 |
| C | 2.873011875  | 0.898262844  | -1.674454932 |
| C | 3.377702611  | -1.421814597 | -2.391181913 |
| C | 3.184777859  | -3.514228801 | 0.316104877  |
| C | 1.651224098  | -2.595120431 | 2.036295210  |
| C | 3.981589678  | -1.860108125 | 2.001515359  |
| C | -2.653016602 | 0.499535556  | 2.273618225  |
| C | -1.794486775 | -2.147072319 | -2.084240070 |
| C | 0.776220774  | 1.567791465  | 2.594179184  |
| C | -1.077509609 | 1.396799363  | -2.213820616 |
| C | -6.395815259 | -1.667713106 | -0.228677137 |
| C | 0.463586507  | 5.704815826  | -0.198313396 |
| H | -4.388203680 | -2.403143123 | -1.901485295 |
| H | -5.122816987 | -0.217870182 | 1.688913481  |
| H | -0.538241003 | 3.983837161  | -2.043478153 |
| H | 0.997059968  | 4.109971304  | 1.940181940  |
| H | 5.408158195  | 0.218399177  | -1.516780263 |
| H | 5.311735319  | -1.238296294 | -0.524966670 |
| H | 4.883886533  | 0.332643303  | 0.176172736  |
| H | 1.851713981  | 0.858357802  | -2.075936256 |
| H | 3.514187552  | 1.278195647  | -2.485454811 |
| H | 2.872418784  | 1.639800749  | -0.866340591 |
| H | 2.380452547  | -1.558234512 | -2.832728927 |
| H | 3.755496068  | -2.416786772 | -2.134850257 |
| H | 4.022023574  | -1.023835160 | -3.190538173 |
| H | 2.409619720  | -3.810007443 | -0.405152420 |
| H | 3.336460276  | -4.363927611 | 1.000512366  |
| H | 4.117213070  | -3.380926770 | -0.243705672 |
| H | 0.749336715  | -2.950409700 | 1.517704872  |
| H | 1.370936907  | -1.734774495 | 2.661914644  |
| H | 1.947161742  | -3.401680833 | 2.724070621  |
| H | 4.914728075  | -1.709464414 | 1.454341393  |
| H | 4.167966029  | -2.650584356 | 2.746158162  |
| H | 3.769640933  | -0.931439295 | 2.547525770  |
| H | -3.526269441 | 0.778701350  | 2.868298051  |
| H | -2.134241259 | 1.422194123  | 1.996550885  |

|   |              |              |              |
|---|--------------|--------------|--------------|
| H | -1.990106927 | -0.079570438 | 2.927639764  |
| H | -2.433684483 | -2.595247471 | -2.849121343 |
| H | -1.135769992 | -2.933184824 | -1.705720974 |
| H | -1.164952050 | -1.405309503 | -2.578972796 |
| H | 1.546756632  | 0.803227375  | 2.455119036  |
| H | -0.070361123 | 1.111431792  | 3.118140245  |
| H | 1.182001545  | 2.339913456  | 3.252600930  |
| H | -1.272999971 | 2.108543238  | -3.019653029 |
| H | -2.018988233 | 0.887641775  | -1.985522281 |
| H | -0.372934977 | 0.655720239  | -2.606985934 |
| H | 2.283738238  | 0.020382782  | 0.822207605  |
| H | -0.194035781 | -0.624122710 | 1.663696578  |
| H | -7.012401980 | -0.868702033 | 0.193877919  |
| H | -6.626397257 | -2.588588440 | 0.320166662  |
| H | -6.696863525 | -1.820228489 | -1.269315962 |
| H | -0.482918187 | 6.243735504  | -0.071919921 |
| H | 0.857516279  | 5.958759031  | -1.187382365 |
| H | 1.164054608  | 6.078296570  | 0.554008938  |
| H | 0.574643412  | -2.328507178 | -0.537745820 |
| H | 0.784176966  | -0.963695279 | -1.630753971 |

### TS13\_PB<sup>f</sup>

Total number of atoms = 74

|   |              |              |              |
|---|--------------|--------------|--------------|
| C | -1.326204977 | 0.087779650  | 2.172743653  |
| C | -1.305802833 | -0.141545232 | 0.856659710  |
| B | -2.621740659 | -0.381130579 | -0.102438709 |
| P | 0.180143441  | -0.006891880 | -0.210164636 |
| C | -3.004535389 | -1.980232299 | -0.279180114 |
| C | -3.783654323 | 0.797521889  | 0.017568487  |
| C | 1.494651986  | -1.288297467 | -0.131339137 |
| C | 3.612488810  | -3.155909687 | -0.316989936 |
| C | 2.386716648  | -1.262130659 | -1.233456362 |
| C | 1.652521238  | -2.282080766 | 0.858412128  |
| C | 2.707165713  | -3.191274623 | 0.735795186  |
| C | 3.429404400  | -2.182187616 | -1.295125131 |
| C | 0.973552476  | 1.634674580  | 0.003637790  |
| C | 2.095673516  | 4.213614213  | 0.234272708  |
| C | 0.618872814  | 2.649832904  | -0.914379231 |
| C | 1.912081657  | 1.911638011  | 1.019280147  |
| C | 2.451391598  | 3.194495417  | 1.112419406  |
| C | 1.183319006  | 3.917291730  | -0.774058673 |
| C | -4.433737054 | 1.079388341  | -1.352040774 |
| C | -3.211787503 | 2.143063041  | 0.511441207  |
| C | -4.901103318 | 0.412390625  | 1.008131568  |
| C | -3.369299603 | -2.607422796 | 1.080663282  |

|   |              |              |              |
|---|--------------|--------------|--------------|
| C | -1.799740248 | -2.765856840 | -0.836620735 |
| C | -4.164501681 | -2.238331793 | -1.255767200 |
| C | 2.250245408  | -0.277473945 | -2.371464587 |
| C | 0.767567852  | -2.438168745 | 2.070906148  |
| C | -0.317961465 | 2.422949858  | -2.079361016 |
| C | 2.398098944  | 0.877116593  | 2.003748967  |
| C | 4.752576161  | -4.136709253 | -0.409235295 |
| C | 2.665067672  | 5.600813178  | 0.382038422  |
| H | -0.447621704 | 0.307986860  | 2.774684576  |
| H | 2.820624759  | -3.955065331 | 1.501813989  |
| H | 4.111088672  | -2.145933805 | -2.142382202 |
| H | 3.174104872  | 3.402129824  | 1.898666470  |
| H | 0.903821917  | 4.695128679  | -1.481140081 |
| H | -4.899736993 | 0.192862172  | -1.788415241 |
| H | -3.693010298 | 1.449703829  | -2.073136624 |
| H | -5.213296136 | 1.849800763  | -1.258757738 |
| H | -2.882482333 | 2.094778471  | 1.553609267  |
| H | -3.977030050 | 2.929705411  | 0.442387371  |
| H | -2.347714949 | 2.474080929  | -0.075501107 |
| H | -4.503385278 | 0.190396590  | 2.006422179  |
| H | -5.469612684 | -0.461967212 | 0.676883800  |
| H | -5.614839967 | 1.241964798  | 1.120346212  |
| H | -4.282289126 | -2.175831121 | 1.503007362  |
| H | -2.569813631 | -2.470207401 | 1.818471966  |
| H | -3.537078172 | -3.688974366 | 0.972820603  |
| H | -0.925845666 | -2.726675855 | -0.178791243 |
| H | -1.491341962 | -2.389490764 | -1.821173965 |
| H | -2.051386164 | -3.829067658 | -0.960456250 |
| H | -5.108519815 | -1.804770324 | -0.911932915 |
| H | -4.329815793 | -3.319036245 | -1.377258587 |
| H | -3.948640159 | -1.826704346 | -2.249668442 |
| H | 2.984979605  | -0.494608365 | -3.151350822 |
| H | 2.406495697  | 0.756674960  | -2.045550183 |
| H | 1.254419767  | -0.334412812 | -2.825575147 |
| H | 0.996014907  | -3.378945505 | 2.578888429  |
| H | -0.293926168 | -2.439585907 | 1.823638823  |
| H | 0.924173573  | -1.632358298 | 2.795614336  |
| H | -1.305225442 | 2.070888955  | -1.768152340 |
| H | 0.084785417  | 1.681571854  | -2.778377781 |
| H | -0.464996237 | 3.355288796  | -2.631134567 |
| H | 2.921155324  | 1.357090832  | 2.835531861  |
| H | 3.087452350  | 0.168464782  | 1.532228569  |
| H | 1.577223595  | 0.293594129  | 2.424612363  |
| H | -2.094563853 | -0.109906123 | -1.369456581 |
| H | -1.107917205 | -0.089815762 | -1.303122673 |
| H | 5.715947435  | -3.630636586 | -0.277004765 |
| H | 4.773601263  | -4.626412310 | -1.388720482 |

|   |              |              |              |
|---|--------------|--------------|--------------|
| H | 4.675010153  | -4.913844624 | 0.356552414  |
| H | 2.004036162  | 6.227022295  | 0.993206316  |
| H | 2.776909077  | 6.091641885  | -0.589736566 |
| H | 3.644217549  | 5.580668997  | 0.869970422  |
| H | -2.267825674 | 0.072146122  | 2.719898394  |

### 3PB<sup>f</sup>

Total number of atoms = 74

|   |              |              |              |
|---|--------------|--------------|--------------|
| C | 1.289573916  | -0.008524717 | -2.029887787 |
| C | 1.306619295  | -0.230366712 | -0.709106758 |
| B | 2.633673701  | -0.498888702 | 0.269421878  |
| P | -0.241598206 | -0.022882690 | 0.198223609  |
| C | 2.881561698  | -2.150567517 | 0.371467243  |
| C | 3.902106001  | 0.526232186  | -0.126639304 |
| C | -1.639678139 | -1.204592567 | 0.139874858  |
| C | -3.914102327 | -2.869823700 | 0.221243131  |
| C | -2.577501330 | -1.081024271 | 1.196440547  |
| C | -1.826437027 | -2.188772933 | -0.852332710 |
| C | -2.963929108 | -2.995706759 | -0.784703910 |
| C | -3.697071996 | -1.908479883 | 1.204965536  |
| C | -0.876556305 | 1.678699762  | 0.038590831  |
| C | -1.689304162 | 4.354976170  | -0.230660125 |
| C | -0.375704850 | 2.656498645  | 0.926131745  |
| C | -1.789595618 | 2.034783399  | -0.974746701 |
| C | -2.174565398 | 3.369167277  | -1.086607480 |
| C | -0.795459570 | 3.976456613  | 0.766137079  |
| C | 4.742824572  | 0.787652230  | 1.140993281  |
| C | 3.408793893  | 1.916889712  | -0.579694993 |
| C | 4.861984818  | 0.015872494  | -1.217396433 |
| C | 3.097175702  | -2.844151519 | -0.984711136 |
| C | 1.652770676  | -2.806305881 | 1.033886634  |
| C | 4.079732119  | -2.496752375 | 1.270745100  |
| C | -2.421903913 | -0.107526087 | 2.343409729  |
| C | -0.879222299 | -2.441818055 | -1.998153042 |
| C | 0.561011944  | 2.340330077  | 2.068601847  |
| C | -2.402309431 | 1.042206751  | -1.934451832 |
| C | -5.124513026 | -3.764802038 | 0.271505347  |
| C | -2.141355895 | 5.785567284  | -0.368053152 |
| H | 0.410085553  | 0.239388409  | -2.621692017 |
| H | -3.106071866 | -3.752103594 | -1.552739962 |
| H | -4.419032305 | -1.803278786 | 2.011632593  |
| H | -2.873944957 | 3.647369454  | -1.871760412 |
| H | -0.405986655 | 4.731967707  | 1.444238097  |
| H | 5.587131465  | 1.460399739  | 0.921161624  |
| H | 5.158012168  | -0.129619731 | 1.566917302  |

|   |              |              |              |
|---|--------------|--------------|--------------|
| H | 4.133904413  | 1.261670381  | 1.921382387  |
| H | 2.935327499  | 1.899745038  | -1.566703392 |
| H | 4.248427434  | 2.626784055  | -0.634775186 |
| H | 2.674552868  | 2.336605830  | 0.119947511  |
| H | 4.345089884  | -0.211492554 | -2.158711324 |
| H | 5.385107403  | -0.894888939 | -0.906801438 |
| H | 5.632162894  | 0.769348654  | -1.445949355 |
| H | 2.288658023  | -2.622377307 | -1.692583964 |
| H | 3.142476831  | -3.938384630 | -0.869274179 |
| H | 4.031551702  | -2.529329887 | -1.459216706 |
| H | 0.741699939  | -2.709653612 | 0.427807398  |
| H | 1.449701664  | -2.360326782 | 2.016738331  |
| H | 1.804794566  | -3.886302987 | 1.185103687  |
| H | 5.028508221  | -2.163058984 | 0.837801895  |
| H | 4.158436128  | -3.585477981 | 1.419679707  |
| H | 3.980413095  | -2.030966901 | 2.259131947  |
| H | -3.293205597 | -0.158795206 | 3.000746339  |
| H | -2.323584123 | 0.929058199  | 2.006782496  |
| H | -1.542413459 | -0.346162469 | 2.954278761  |
| H | -1.163623858 | -3.360488193 | -2.517320278 |
| H | 0.154023740  | -2.550406234 | -1.666529548 |
| H | -0.898200729 | -1.633344001 | -2.736007140 |
| H | 1.417929893  | 1.729561980  | 1.768764428  |
| H | 0.035989656  | 1.799565741  | 2.867849176  |
| H | 0.949728710  | 3.264284184  | 2.503873684  |
| H | -2.863935002 | 1.565118724  | -2.776147099 |
| H | -3.175865550 | 0.440148784  | -1.445501004 |
| H | -1.668677208 | 0.347201118  | -2.350030717 |
| H | 2.277984137  | -0.153756626 | 1.405474009  |
| H | 0.144125006  | -0.120039688 | 1.530835236  |
| H | -6.025022099 | -3.200104243 | 0.533887252  |
| H | -4.995317864 | -4.546133513 | 1.029657282  |
| H | -5.297266561 | -4.258030451 | -0.689150086 |
| H | -3.080058615 | 5.948520515  | 0.174869344  |
| H | -2.318586914 | 6.046101124  | -1.415981649 |
| H | -1.399226466 | 6.480031609  | 0.036279629  |
| H | 2.220136079  | -0.057369676 | -2.589513494 |

### TS13\_PB<sup>a</sup>

Total number of atoms = 84

|   |              |              |              |
|---|--------------|--------------|--------------|
| C | 1.167182404  | 0.409966670  | -1.110199926 |
| C | 0.870094096  | -0.244990108 | 0.030867322  |
| B | 1.746574814  | -0.931300952 | 1.274395707  |
| P | -0.868691021 | -0.076802180 | 0.599461723  |
| C | 1.746652381  | -2.592499513 | 1.357325871  |



|   |              |              |              |
|---|--------------|--------------|--------------|
| C | 3.046500946  | -0.040790294 | 1.829556880  |
| C | -2.147170963 | -1.155012407 | -0.151060190 |
| C | -4.310473490 | -2.731713408 | -1.055100249 |
| C | -3.359773587 | -1.192984794 | 0.574020755  |
| C | -2.012125987 | -1.936873436 | -1.321673391 |
| C | -3.097938109 | -2.704691191 | -1.739930335 |
| C | -4.418507811 | -1.968494566 | 0.100779013  |
| C | -1.427402019 | 1.662858737  | 0.415232516  |
| C | -2.126233996 | 4.396536371  | 0.294732252  |
| C | -1.189211937 | 2.511682104  | 1.520121079  |
| C | -2.053264821 | 2.184427294  | -0.739020266 |
| C | -2.384392058 | 3.539503930  | -0.771113036 |
| C | -1.537261931 | 3.858998486  | 1.434499690  |
| C | 3.034080839  | 0.025169861  | 3.374555950  |
| C | 3.019679620  | 1.425579284  | 1.351121477  |
| C | 4.419389706  | -0.608653464 | 1.411190538  |
| C | 2.530931896  | -3.243491889 | 0.203371096  |
| C | 0.315493872  | -3.163207890 | 1.289654277  |
| C | 2.328449329  | -3.125243415 | 2.680547337  |
| C | -3.568519943 | -0.420985489 | 1.856919501  |
| C | -0.769417606 | -1.989935373 | -2.179385073 |
| C | -0.602130447 | 2.012711543  | 2.819466052  |
| C | -2.426671300 | 1.356593400  | -1.946157132 |
| C | 2.437251655  | 0.524924121  | -1.846817840 |
| C | 4.822064266  | 0.862251482  | -3.287825174 |
| C | 2.693613146  | 1.714032826  | -2.544865439 |
| C | 3.380040902  | -0.502976486 | -1.916163115 |
| C | 4.563410126  | -0.335960442 | -2.628564090 |
| C | 3.879667642  | 1.888396266  | -3.246485533 |
| C | -5.450953956 | -3.586844490 | -1.543426669 |
| C | -2.458689425 | 5.863412925  | 0.205302160  |
| H | 0.377534065  | 0.986122001  | -1.596281058 |
| H | -2.992645756 | -3.301473167 | -2.643522267 |
| H | -5.350268030 | -1.981242112 | 0.661889469  |
| H | -2.860498119 | 3.938430732  | -1.664433970 |
| H | -1.344249367 | 4.505235122  | 2.287778150  |
| H | 3.899082130  | 0.600343813  | 3.735698784  |
| H | 3.079891808  | -0.959429869 | 3.845250340  |
| H | 2.131686000  | 0.525482608  | 3.748173375  |
| H | 3.231094198  | 1.514844316  | 0.283314122  |
| H | 3.784279731  | 2.010130715  | 1.883166256  |
| H | 2.053064448  | 1.910274269  | 1.530477808  |
| H | 4.539075716  | -0.632684545 | 0.324439625  |
| H | 4.590335065  | -1.619940260 | 1.792387709  |
| H | 5.224528627  | 0.026440972  | 1.809671228  |
| H | 2.068911130  | -3.027403911 | -0.767668030 |
| H | 2.540018760  | -4.337879604 | 0.314487995  |

|   |              |              |              |
|---|--------------|--------------|--------------|
| H | 3.574157086  | -2.911672896 | 0.168253845  |
| H | -0.188299796 | -2.935993241 | 0.347399811  |
| H | -0.314933144 | -2.787122892 | 2.106323870  |
| H | 0.334409095  | -4.259038639 | 1.378690546  |
| H | 3.385427394  | -2.880190245 | 2.814522915  |
| H | 2.244570530  | -4.221466474 | 2.715318573  |
| H | 1.779435277  | -2.730224013 | 3.544076130  |
| H | -4.533992351 | -0.675618400 | 2.302169907  |
| H | -3.552727671 | 0.662548538  | 1.692466482  |
| H | -2.789467125 | -0.651578572 | 2.592563887  |
| H | -0.888526072 | -2.747306424 | -2.958938477 |
| H | 0.126765536  | -2.233812859 | -1.606411951 |
| H | -0.567575888 | -1.035622128 | -2.676221596 |
| H | 0.385244242  | 1.561844346  | 2.686271820  |
| H | -1.245907320 | 1.255465939  | 3.282087413  |
| H | -0.491103356 | 2.836336919  | 3.529860944  |
| H | -2.692583187 | 2.008784266  | -2.782673952 |
| H | -3.284462391 | 0.709418655  | -1.735311800 |
| H | -1.613413439 | 0.708757284  | -2.278902666 |
| H | 1.958996918  | 2.515423147  | -2.513196857 |
| H | 3.180193466  | -1.438867437 | -1.412387320 |
| H | 5.285643654  | -1.146258232 | -2.666390995 |
| H | 4.068652068  | 2.824318489  | -3.764027492 |
| H | 5.749199119  | 0.994144388  | -3.837643273 |
| H | 0.853100440  | -0.701621772 | 2.323907635  |
| H | -0.065125603 | -0.519444341 | 1.995550455  |
| H | -5.243715347 | -4.649079215 | -1.368765513 |
| H | -5.610055678 | -3.457741733 | -2.619211172 |
| H | -6.384824147 | -3.340734020 | -1.029693636 |
| H | -1.660008892 | 6.409349331  | -0.311225033 |
| H | -2.574619998 | 6.309019224  | 1.197811174  |
| H | -3.384983304 | 6.029089407  | -0.353865406 |

### 3PB<sup>a</sup>

Total number of atoms = 84

|   |              |              |              |
|---|--------------|--------------|--------------|
| C | 1.097069002  | -0.463476760 | 1.028276796  |
| C | 0.893393426  | 0.183991620  | -0.143770703 |
| B | 1.820671358  | 0.788037678  | -1.429841451 |
| P | -0.859101428 | 0.063381686  | -0.580550593 |
| C | 1.881247286  | 2.462740751  | -1.479549242 |
| C | 3.211677498  | -0.113268604 | -1.742989957 |
| C | -2.085527282 | 1.235701888  | 0.097212487  |
| C | -4.152601009 | 2.920624649  | 1.005479560  |
| C | -3.301610023 | 1.320908397  | -0.622224621 |
| C | -1.895797844 | 2.015389994  | 1.258004608  |
| C | -2.940084245 | 2.837607446  | 1.681504014  |

|   |              |              |              |
|---|--------------|--------------|--------------|
| C | -4.310450910 | 2.155168135  | -0.145898251 |
| C | -1.507607831 | -1.636402142 | -0.423344754 |
| C | -2.327481014 | -4.324947486 | -0.288063040 |
| C | -1.233632255 | -2.513638852 | -1.496793210 |
| C | -2.198565432 | -2.102461746 | 0.716170837  |
| C | -2.589292896 | -3.440265335 | 0.755006788  |
| C | -1.651428313 | -3.840204680 | -1.402854471 |
| C | 3.361579991  | -0.233852503 | -3.277449971 |
| C | 3.117536830  | -1.567943873 | -1.238657055 |
| C | 4.542633023  | 0.451300442  | -1.210234689 |
| C | 2.596333003  | 3.142733588  | -0.300582657 |
| C | 0.455432407  | 3.046319814  | -1.521635589 |
| C | 2.555428590  | 2.953020812  | -2.773914507 |
| C | -3.568148540 | 0.562528349  | -1.904067335 |
| C | -0.636091567 | 2.027328359  | 2.090803257  |
| C | -0.532402133 | -2.075782832 | -2.760887587 |
| C | -2.562432946 | -1.240683433 | 1.903725376  |
| C | 2.305376693  | -0.569113845 | 1.861307309  |
| C | 4.531030040  | -0.845557154 | 3.544454910  |
| C | 2.493826037  | -1.735494964 | 2.616659988  |
| C | 3.232685798  | 0.467013713  | 1.989187868  |
| C | 4.337129739  | 0.329440408  | 2.823999162  |
| C | 3.602913051  | -1.880357761 | 3.439615431  |
| C | -5.248073410 | 3.838133645  | 1.481762282  |
| C | -2.780941914 | -5.759720639 | -0.214384911 |
| H | 0.271592922  | -1.016002001 | 1.485784974  |
| H | -2.795726437 | 3.434994679  | 2.578382896  |
| H | -5.246475878 | 2.212441019  | -0.696689138 |
| H | -3.111732012 | -3.804608615 | 1.636725157  |
| H | -1.432161146 | -4.515326172 | -2.226508439 |
| H | 4.262762548  | -0.812665199 | -3.535295872 |
| H | 3.445496911  | 0.736590566  | -3.773087034 |
| H | 2.498370207  | -0.749414625 | -3.717404739 |
| H | 3.224571255  | -1.644805478 | -0.153850051 |
| H | 3.919687600  | -2.178307124 | -1.681471903 |
| H | 2.164395288  | -2.040376282 | -1.508631455 |
| H | 4.554893255  | 0.524846646  | -0.119168907 |
| H | 4.760606761  | 1.445094941  | -1.615598569 |
| H | 5.381315956  | -0.202684760 | -1.496902115 |
| H | 2.074035024  | 2.961767225  | 0.647932055  |
| H | 2.631516373  | 4.235368303  | -0.434999221 |
| H | 3.628960942  | 2.796397687  | -0.187366375 |
| H | -0.097738775 | 2.870600881  | -0.592530086 |
| H | -0.126199278 | 2.622623617  | -2.351965944 |
| H | 0.475028340  | 4.138076016  | -1.663279751 |
| H | 3.618109305  | 2.696326273  | -2.819369509 |
| H | 2.484898884  | 4.049307950  | -2.856080582 |

|   |              |              |              |
|---|--------------|--------------|--------------|
| H | 2.069424908  | 2.522878235  | -3.657997561 |
| H | -4.601012211 | 0.718829883  | -2.224497820 |
| H | -3.416765251 | -0.516439690 | -1.795290727 |
| H | -2.919821740 | 0.911925734  | -2.717134386 |
| H | -0.707029791 | 2.803760957  | 2.856635355  |
| H | 0.253566169  | 2.224232078  | 1.490003197  |
| H | -0.463840187 | 1.075211097  | 2.603012069  |
| H | 0.378944156  | -1.500521342 | -2.572559494 |
| H | -1.188608474 | -1.448843239 | -3.379725147 |
| H | -0.254633146 | -2.946548935 | -3.359992983 |
| H | -2.891516163 | -1.870564113 | 2.734389642  |
| H | -3.375014302 | -0.547344033 | 1.664053921  |
| H | -1.722412449 | -0.642000844 | 2.264472179  |
| H | 1.768522187  | -2.542268619 | 2.536548872  |
| H | 3.081701726  | 1.381969459  | 1.432450542  |
| H | 5.050517407  | 1.144105921  | 2.906788131  |
| H | 3.743388964  | -2.799106433 | 4.001454368  |
| H | 5.396254358  | -0.952486220 | 4.192041714  |
| H | 1.080589176  | 0.513930269  | -2.385541299 |
| H | -0.930046813 | 0.329176485  | -1.943697083 |
| H | -6.237025169 | 3.409097333  | 1.293205451  |
| H | -5.199410976 | 4.799534534  | 0.957040296  |
| H | -5.160235272 | 4.040965999  | 2.553057813  |
| H | -3.842707015 | -5.845096363 | -0.474415240 |
| H | -2.657549638 | -6.164067854 | 0.795254832  |
| H | -2.217060946 | -6.392165896 | -0.905924639 |

### 1PAI<sup>b</sup>

Total number of atoms = 53

|    |              |              |              |
|----|--------------|--------------|--------------|
| C  | -0.728060106 | -0.421035659 | -1.661681573 |
| AL | 0.869559141  | 0.170415249  | -0.651490167 |
| C  | 2.239791189  | -1.180310269 | -0.262318696 |
| C  | 3.216849219  | -0.959664728 | 0.724077636  |
| C  | 2.308928942  | -2.397330394 | -0.961220207 |
| C  | 4.194038024  | -1.909953048 | 1.015069062  |
| C  | 3.282335867  | -3.353687506 | -0.683339447 |
| C  | 4.225473440  | -3.111986038 | 0.312577216  |
| C  | 1.230951053  | 2.057018454  | -0.235618707 |
| C  | 1.325442750  | 3.036384113  | -1.238797817 |
| C  | 1.386394410  | 2.492626133  | 1.092400867  |
| C  | 1.560353009  | 4.376746046  | -0.938707985 |
| C  | 1.618408446  | 3.830606743  | 1.405286870  |
| C  | 1.705748930  | 4.776778468  | 0.387318254  |
| P  | -1.472736480 | -0.424180604 | 0.044328518  |
| C  | -2.145213008 | -2.168795913 | 0.340011888  |

|   |              |              |              |
|---|--------------|--------------|--------------|
| C | -2.989798926 | -2.207059427 | 1.621529389  |
| C | -2.954851178 | -2.740667718 | -0.831416010 |
| C | -0.899960148 | -3.048474421 | 0.554980856  |
| C | -2.831554672 | 0.889107452  | 0.059177837  |
| C | -3.184599971 | 1.214978639  | 1.521209649  |
| C | -4.089801797 | 0.474113306  | -0.712702077 |
| C | -2.260788514 | 2.172871153  | -0.570539512 |
| H | -0.635378479 | -1.440082925 | -2.050268293 |
| H | -1.263639671 | 0.193179725  | -2.387999215 |
| H | -3.950725418 | -1.698738356 | 1.496196738  |
| H | -3.205056715 | -3.251798761 | 1.879043184  |
| H | -2.464643513 | -1.755706747 | 2.470839323  |
| H | -3.900443057 | -2.215734437 | -0.983352050 |
| H | -2.394938096 | -2.706322660 | -1.770994793 |
| H | -3.189313075 | -3.793317365 | -0.626410940 |
| H | -0.259847581 | -3.081935876 | -0.331434779 |
| H | -0.287805671 | -2.693129145 | 1.390028512  |
| H | -1.214961875 | -4.077225688 | 0.771852344  |
| H | -3.917100628 | 2.031883472  | 1.542731193  |
| H | -3.624598994 | 0.366045996  | 2.050129818  |
| H | -2.298118845 | 1.541604003  | 2.075233022  |
| H | -4.621206457 | -0.345930570 | -0.220334473 |
| H | -4.781856429 | 1.324443791  | -0.767727139 |
| H | -3.854928945 | 0.168000329  | -1.738278409 |
| H | -1.357882904 | 2.517265149  | -0.059210092 |
| H | -2.025124453 | 2.050630012  | -1.631727598 |
| H | -3.015829513 | 2.965032564  | -0.491117160 |
| H | 1.202815860  | 2.755847758  | -2.284473312 |
| H | 1.626549009  | 5.110510335  | -1.737679597 |
| H | 1.885330500  | 5.821569418  | 0.625236045  |
| H | 1.729780419  | 4.135409356  | 2.442578229  |
| H | 1.310917895  | 1.774603499  | 1.908366417  |
| H | 3.223544699  | -0.019862887 | 1.274533907  |
| H | 4.933725979  | -1.711320095 | 1.786130033  |
| H | 4.985681619  | -3.855263914 | 0.536606079  |
| H | 3.307075448  | -4.286166094 | -1.241137985 |
| H | 1.584235460  | -2.609771321 | -1.746699604 |

### TS13\_PA1<sup>b</sup>

Total number of atoms = 55

|    |              |              |              |
|----|--------------|--------------|--------------|
| C  | 0.662053673  | 0.014383571  | 0.988135551  |
| AL | -1.059097229 | 0.070255653  | -0.104297496 |
| P  | 2.009386973  | -0.027085617 | -0.227779411 |
| C  | 3.270806455  | 1.286803262  | 0.225686020  |
| C  | 4.533743024  | 1.168444004  | -0.638047399 |

|   |              |              |              |
|---|--------------|--------------|--------------|
| C | 2.574703375  | 2.625030896  | -0.093237327 |
| C | 3.652904201  | 1.254461022  | 1.712472621  |
| C | 2.679544160  | -1.774626455 | -0.301709200 |
| C | 3.500812428  | -2.169055919 | 0.931157159  |
| C | 1.446722726  | -2.694234257 | -0.417516942 |
| C | 3.518622701  | -1.947520212 | -1.579547016 |
| C | -1.944575924 | 1.836770933  | -0.100905428 |
| C | -3.181997219 | 2.039623416  | 0.533502228  |
| C | -1.346571999 | 2.965147411  | -0.688939801 |
| C | -3.786066269 | 3.295303715  | 0.588934043  |
| C | -1.937489678 | 4.225879202  | -0.640911517 |
| C | -3.161873930 | 4.393052116  | 0.002245970  |
| C | -2.203390997 | -1.535390169 | -0.009470636 |
| C | -3.226808213 | -1.748141379 | -0.950152660 |
| C | -2.052518370 | -2.515148848 | 0.986669276  |
| C | -4.045326131 | -2.875052683 | -0.909085890 |
| C | -2.866966626 | -3.645318332 | 1.043805279  |
| C | -3.865233969 | -3.828465777 | 0.090529895  |
| H | 0.710047677  | 0.955866624  | 1.547551360  |
| H | 0.730369582  | -0.799253674 | 1.718187728  |
| H | 4.298186185  | 1.100819242  | -1.706125969 |
| H | 5.155843924  | 2.059492446  | -0.489423845 |
| H | 5.137431591  | 0.298749858  | -0.359504608 |
| H | 1.633469104  | 2.749261965  | 0.453363559  |
| H | 3.234153423  | 3.453728593  | 0.192526804  |
| H | 2.359519104  | 2.718498223  | -1.163470434 |
| H | 4.149709676  | 0.320937587  | 1.989810128  |
| H | 4.346932531  | 2.077796070  | 1.924569456  |
| H | 2.780253026  | 1.379862710  | 2.360085525  |
| H | 3.731762544  | -3.241011414 | 0.887257243  |
| H | 4.452535067  | -1.629737454 | 0.975967253  |
| H | 2.954330282  | -1.983766117 | 1.862386222  |
| H | 0.800112655  | -2.417260787 | -1.257714122 |
| H | 1.787213449  | -3.723013692 | -0.586892690 |
| H | 0.834070631  | -2.694193653 | 0.487332633  |
| H | 4.445129901  | -1.368399889 | -1.558458656 |
| H | 3.793664182  | -3.003863943 | -1.687846608 |
| H | 2.953025766  | -1.657279100 | -2.471823857 |
| H | -3.693986047 | 1.194540728  | 0.992738899  |
| H | -0.395419188 | 2.858920696  | -1.211509773 |
| H | -4.745218881 | 3.417203076  | 1.085814894  |
| H | -1.449234697 | 5.077264722  | -1.108842037 |
| H | -3.629645543 | 5.373144087  | 0.041679364  |
| H | -3.394376815 | -1.013482542 | -1.737175710 |
| H | -1.280881125 | -2.395819387 | 1.747556284  |
| H | -4.825016111 | -3.009543922 | -1.654494026 |
| H | -2.724332389 | -4.382498210 | 1.830082659  |

|   |              |              |              |
|---|--------------|--------------|--------------|
| H | -4.502014778 | -4.708329328 | 0.127981569  |
| H | 0.830597711  | 0.154439498  | -1.431583305 |
| H | -0.177333526 | 0.098214671  | -1.669152673 |

### 3PAI<sup>b</sup>

Total number of atoms = 55

|    |              |              |              |
|----|--------------|--------------|--------------|
| C  | 0.053824138  | -0.936802345 | 0.570660159  |
| AL | -1.296579278 | -0.184488720 | -0.851208256 |
| P  | 1.702299580  | -0.643690633 | 0.014517084  |
| C  | 2.730555151  | 0.290691632  | 1.254744311  |
| C  | 4.160051647  | 0.512414244  | 0.742063298  |
| C  | 2.039989813  | 1.660289144  | 1.416319745  |
| C  | 2.748706875  | -0.433445657 | 2.608583906  |
| C  | 2.481315192  | -2.169725656 | -0.720836432 |
| C  | 3.119006386  | -3.046008763 | 0.366663224  |
| C  | 1.373692035  | -2.967794799 | -1.435633235 |
| C  | 3.529937912  | -1.753592738 | -1.766654784 |
| C  | -0.811345337 | 1.759557971  | -0.797778725 |
| C  | -1.194607415 | 2.587778264  | 0.272395244  |
| C  | 0.064380898  | 2.332723682  | -1.737594241 |
| C  | -0.717450562 | 3.889687132  | 0.417177059  |
| C  | 0.554263265  | 3.634457482  | -1.608986249 |
| C  | 0.170196912  | 4.414465904  | -0.520775682 |
| C  | -3.094919350 | -0.680167613 | -0.165277946 |
| C  | -4.096123541 | -1.200721700 | -1.003776790 |
| C  | -3.437360360 | -0.532313919 | 1.191029416  |
| C  | -5.358987968 | -1.549149406 | -0.525808769 |
| C  | -4.695030088 | -0.873988495 | 1.685253984  |
| C  | -5.662053615 | -1.384975247 | 0.823209247  |
| H  | -0.137229459 | -0.373364298 | 1.489179279  |
| H  | -0.112589256 | -1.999131914 | 0.765023283  |
| H  | 4.171078992  | 0.989888318  | -0.244180920 |
| H  | 4.684483305  | 1.180165486  | 1.435248279  |
| H  | 4.732180579  | -0.418821499 | 0.689313120  |
| H  | 1.025227366  | 1.571895942  | 1.812915935  |
| H  | 2.623436772  | 2.260847173  | 2.123994619  |
| H  | 1.975419202  | 2.212830144  | 0.473187058  |
| H  | 3.279161191  | -1.388526316 | 2.566880430  |
| H  | 3.262321070  | 0.200986939  | 3.340109364  |
| H  | 1.736746193  | -0.618509237 | 2.982441916  |
| H  | 3.445375793  | -3.988865300 | -0.086768430 |
| H  | 3.998525141  | -2.575421114 | 0.816159853  |
| H  | 2.407913944  | -3.291007999 | 1.163240930  |
| H  | 0.817171930  | -2.358297504 | -2.153443176 |
| H  | 1.843836044  | -3.799402440 | -1.973317898 |

|   |              |              |              |
|---|--------------|--------------|--------------|
| H | 0.652629919  | -3.392834819 | -0.732002591 |
| H | 4.353983614  | -1.176741563 | -1.339997573 |
| H | 3.958037136  | -2.657714710 | -2.214604311 |
| H | 3.077773491  | -1.167403309 | -2.573812225 |
| H | -1.891687932 | 2.206437009  | 1.019380331  |
| H | 0.369136670  | 1.747069462  | -2.606236863 |
| H | -1.038661821 | 4.498691663  | 1.259000826  |
| H | 1.228813437  | 4.041216839  | -2.359144664 |
| H | 0.548155880  | 5.427593596  | -0.411202028 |
| H | -3.885494325 | -1.342710775 | -2.063194531 |
| H | -2.700990402 | -0.139747439 | 1.894264733  |
| H | -6.107474861 | -1.948289281 | -1.206212986 |
| H | -4.921259627 | -0.742349530 | 2.740796980  |
| H | -6.644921839 | -1.654021788 | 1.201446636  |
| H | 1.692409193  | 0.254046636  | -1.067198738 |
| H | -0.870722436 | -0.825070204 | -2.283175993 |

### TS14\_PAI<sup>b</sup>

Total number of atoms = 56

|    |              |              |              |
|----|--------------|--------------|--------------|
| C  | -0.305896260 | 0.674462133  | 2.353368247  |
| O  | 0.562727446  | 0.119356469  | 1.769722810  |
| C  | -0.679955535 | -0.040379836 | -1.152647378 |
| O  | -0.978735002 | 1.234823025  | 3.113127595  |
| AL | 1.133402792  | 0.038958871  | -0.343198782 |
| P  | -2.030840718 | 0.000840809  | 0.104526089  |
| C  | -3.419385699 | 0.980766597  | -0.737955737 |
| C  | -4.730354182 | 0.828606545  | 0.045826666  |
| C  | -2.968005581 | 2.451607756  | -0.634675526 |
| C  | -3.657832733 | 0.649949331  | -2.217820845 |
| C  | -2.516808554 | -1.819323295 | 0.313348209  |
| C  | -3.238619391 | -2.443586242 | -0.886464668 |
| C  | -1.218816516 | -2.607606966 | 0.567220942  |
| C  | -3.393778358 | -1.950422457 | 1.571127635  |
| C  | 1.961731419  | 1.820416030  | -0.313415485 |
| C  | 3.351742267  | 1.996763757  | -0.415342149 |
| C  | 1.183491925  | 2.984470336  | -0.176144973 |
| C  | 3.935781836  | 3.262172980  | -0.383174775 |
| C  | 1.755102824  | 4.254722418  | -0.135153544 |
| C  | 3.137173419  | 4.394081747  | -0.241034613 |
| C  | 2.291791105  | -1.542140107 | -0.300210167 |
| C  | 3.336968974  | -1.670732113 | 0.631527304  |
| C  | 2.129398765  | -2.593381307 | -1.218718492 |
| C  | 4.167358555  | -2.789592174 | 0.655130503  |
| C  | 2.957913408  | -3.713926696 | -1.211438080 |
| C  | 3.978680448  | -3.813948912 | -0.269595779 |



|   |              |              |              |
|---|--------------|--------------|--------------|
| H | -0.752665206 | 0.891117886  | -1.730724100 |
| H | -0.813362745 | -0.860529772 | -1.870759882 |
| H | -4.584693715 | 1.000457475  | 1.118681453  |
| H | -5.461393295 | 1.564020280  | -0.314025003 |
| H | -5.174326536 | -0.162767174 | -0.088435355 |
| H | -2.037359264 | 2.635460959  | -1.183934550 |
| H | -3.735512943 | 3.105450173  | -1.068340380 |
| H | -2.814393340 | 2.753054910  | 0.407421643  |
| H | -4.062027640 | -0.354429100 | -2.361974538 |
| H | -4.383071283 | 1.360249357  | -2.636545799 |
| H | -2.738384155 | 0.732731802  | -2.805781149 |
| H | -3.352089889 | -3.523925107 | -0.727126500 |
| H | -4.241614359 | -2.027149444 | -1.018938140 |
| H | -2.682375919 | -2.303337901 | -1.819745086 |
| H | -0.637059262 | -2.197513317 | 1.400104164  |
| H | -1.470855319 | -3.643832562 | 0.826011948  |
| H | -0.568340284 | -2.639751458 | -0.310816136 |
| H | -4.356264287 | -1.442859522 | 1.467855981  |
| H | -3.599181776 | -3.010932716 | 1.765954218  |
| H | -2.890235295 | -1.538201930 | 2.452664268  |
| H | 3.996725082  | 1.125836413  | -0.524288132 |
| H | 0.098401007  | 2.904276372  | -0.096090610 |
| H | 5.013973586  | 3.366938093  | -0.470652445 |
| H | 1.125655297  | 5.133754795  | -0.024356369 |
| H | 3.590006662  | 5.381296906  | -0.213162291 |
| H | 3.509279700  | -0.880213056 | 1.361229853  |
| H | 1.334999676  | -2.543131056 | -1.963433358 |
| H | 4.962264558  | -2.861990383 | 1.392632454  |
| H | 2.808048371  | -4.508020672 | -1.938148509 |
| H | 4.626194824  | -4.686450827 | -0.256931885 |

#### 4PAI<sup>b</sup>

Total number of atoms = 56

|    |              |              |              |
|----|--------------|--------------|--------------|
| C  | -1.153538776 | 0.155478359  | 1.613230513  |
| O  | 0.128732912  | 0.125895211  | 1.665811243  |
| C  | -0.362744807 | 0.106028480  | -1.199986102 |
| O  | -1.948593320 | 0.258639694  | 2.527991360  |
| AL | 1.209606593  | 0.058987709  | 0.135614700  |
| P  | -1.804141620 | 0.005446296  | -0.166212527 |
| C  | -2.925084421 | 1.474546953  | -0.426222108 |
| C  | -4.248508948 | 1.344947389  | 0.341166485  |
| C  | -2.142778005 | 2.694411055  | 0.104785762  |
| C  | -3.205322383 | 1.664717921  | -1.926032864 |
| C  | -2.565892647 | -1.696080014 | -0.273244337 |
| C  | -3.220124512 | -1.887496665 | -1.650206835 |

|   |              |              |              |
|---|--------------|--------------|--------------|
| C | -1.408925835 | -2.702203916 | -0.097176451 |
| C | -3.597905846 | -1.943521026 | 0.839641690  |
| C | 2.177103722  | 1.771915095  | 0.049537243  |
| C | 3.227737316  | 1.967667960  | -0.863731642 |
| C | 1.783034718  | 2.889593599  | 0.806154645  |
| C | 3.846336810  | 3.206606379  | -1.023490893 |
| C | 2.394867503  | 4.133700384  | 0.658299527  |
| C | 3.427471105  | 4.295072402  | -0.262125614 |
| C | 2.124885542  | -1.684586073 | 0.055550284  |
| C | 2.568157403  | -2.361266632 | 1.205308707  |
| C | 2.328622602  | -2.335030338 | -1.174041475 |
| C | 3.176513966  | -3.613357687 | 1.134695402  |
| C | 2.939131102  | -3.585486993 | -1.260513886 |
| C | 3.363717543  | -4.228673331 | -0.100887216 |
| H | -0.332309205 | 1.065974636  | -1.722309572 |
| H | -0.339766110 | -0.698496569 | -1.939116686 |
| H | -4.087986677 | 1.093933856  | 1.393181941  |
| H | -4.769927002 | 2.308280112  | 0.294586192  |
| H | -4.906045101 | 0.596515652  | -0.112009102 |
| H | -1.147958266 | 2.791291960  | -0.344899422 |
| H | -2.704603919 | 3.602666671  | -0.141835313 |
| H | -2.029022038 | 2.655965139  | 1.192201813  |
| H | -3.728094273 | 0.810388706  | -2.364929590 |
| H | -3.846672117 | 2.545066695  | -2.049010767 |
| H | -2.290303949 | 1.838497886  | -2.499451881 |
| H | -3.510068972 | -2.938830630 | -1.759145107 |
| H | -4.127222622 | -1.283875145 | -1.754967127 |
| H | -2.540094035 | -1.644082569 | -2.473609216 |
| H | -0.895508933 | -2.581595561 | 0.862619508  |
| H | -1.830804711 | -3.713360016 | -0.120970951 |
| H | -0.655751916 | -2.637601454 | -0.886431574 |
| H | -4.477952142 | -1.304703817 | 0.746751293  |
| H | -3.934585869 | -2.983960691 | 0.761560910  |
| H | -3.172765065 | -1.794400641 | 1.834875124  |
| H | 3.582490639  | 1.130600668  | -1.465452120 |
| H | 0.985647499  | 2.786528271  | 1.541592663  |
| H | 4.656420895  | 3.322928469  | -1.739037402 |
| H | 2.069315448  | 4.976353869  | 1.263245148  |
| H | 3.907524059  | 5.262646098  | -0.381639274 |
| H | 2.432599411  | -1.903529749 | 2.184020717  |
| H | 1.999867184  | -1.858575782 | -2.098881995 |
| H | 3.506347186  | -4.109715701 | 2.043707742  |
| H | 3.083536022  | -4.057745360 | -2.229001566 |
| H | 3.839297470  | -5.203878669 | -0.160133410 |

1PAI<sup>c</sup>

Total number of atoms = 54

|    |              |              |              |
|----|--------------|--------------|--------------|
| C  | 0.616309274  | -0.521258803 | 1.554493734  |
| P  | 1.351251310  | -0.621469861 | -0.140645015 |
| C  | 2.925551600  | 0.431638379  | -0.177518919 |
| C  | 4.149727367  | -0.255019198 | 0.439494458  |
| C  | 3.210955547  | 0.818600322  | -1.638949108 |
| C  | 2.634022714  | 1.723115355  | 0.607055413  |
| C  | 1.664324193  | -2.440970880 | -0.552194427 |
| C  | 2.399946412  | -3.220781533 | 0.545363403  |
| C  | 2.430708736  | -2.546288306 | -1.879178484 |
| C  | 0.271808607  | -3.067616812 | -0.742517248 |
| AL | -0.891437101 | 0.294853336  | 0.598961794  |
| C  | -0.882790174 | 2.221303475  | 0.202669460  |
| C  | -0.796740390 | 2.677627132  | -1.124809402 |
| C  | -0.916020601 | 3.200679347  | 1.209138403  |
| C  | -0.742606615 | 4.035392209  | -1.433858333 |
| C  | -0.864392976 | 4.561439455  | 0.912459472  |
| C  | -0.775507115 | 4.981331112  | -0.412348135 |
| C  | -2.493644190 | -0.762778477 | 0.207037597  |
| C  | -3.430577395 | -0.310607700 | -0.738087211 |
| C  | -2.776203478 | -1.975639122 | 0.857859445  |
| C  | -4.579795716 | -1.040777936 | -1.036977472 |
| C  | -3.923647812 | -2.711169635 | 0.571469815  |
| C  | -4.825697680 | -2.245150170 | -0.382523854 |
| C  | 1.148510610  | -0.891687772 | 2.722440555  |
| H  | 4.991641571  | 0.449668920  | 0.445844223  |
| H  | 3.962815388  | -0.556376947 | 1.475349895  |
| H  | 4.465102184  | -1.135517849 | -0.128252741 |
| H  | 2.353443136  | 1.336926209  | -2.081147422 |
| H  | 4.070753457  | 1.500071504  | -1.671758822 |
| H  | 3.449862690  | -0.045161553 | -2.265517933 |
| H  | 3.505692229  | 2.385446687  | 0.529131416  |
| H  | 1.768947978  | 2.259614540  | 0.206958293  |
| H  | 2.451167713  | 1.522690328  | 1.666128273  |
| H  | 2.524204607  | -4.263299758 | 0.224071268  |
| H  | 3.394099521  | -2.818858382 | 0.755529197  |
| H  | 1.825693903  | -3.226922463 | 1.475926412  |
| H  | 3.469023237  | -2.214115711 | -1.786163313 |
| H  | 2.451641777  | -3.596015694 | -2.198633453 |
| H  | 1.949692325  | -1.965631475 | -2.674545602 |
| H  | -0.321164238 | -3.021843361 | 0.175085488  |
| H  | -0.297376204 | -2.570907080 | -1.534702329 |
| H  | 0.386597514  | -4.125337445 | -1.012298519 |
| H  | -0.729776761 | 6.041323291  | -0.646577637 |
| H  | -0.889684758 | 5.294966388  | 1.713884873  |
| H  | -0.670499332 | 4.355550263  | -2.470054776 |
| H  | -0.754344290 | 1.956531557  | -1.940584623 |

|   |              |              |              |
|---|--------------|--------------|--------------|
| H | -0.974353470 | 2.902336234  | 2.255319322  |
| H | -2.082930542 | -2.355907424 | 1.607463367  |
| H | -4.115459542 | -3.646879573 | 1.090026752  |
| H | -5.722021011 | -2.815838115 | -0.610340020 |
| H | -5.285398555 | -0.669504660 | -1.775490670 |
| H | -3.265812315 | 0.637494955  | -1.248432399 |
| H | 2.139777016  | -1.336214757 | 2.826696436  |
| H | 0.603131856  | -0.757616673 | 3.657141977  |

### TS13\_PAI<sup>c</sup>

Total number of atoms = 56

|    |              |              |              |
|----|--------------|--------------|--------------|
| C  | 0.312182297  | -0.704861817 | 0.804195266  |
| P  | 1.779032864  | -0.567856796 | -0.257192627 |
| C  | 3.049210951  | 0.617321399  | 0.462986164  |
| C  | 3.936910570  | -0.026130926 | 1.535809864  |
| C  | 3.912356847  | 1.155024965  | -0.691135907 |
| C  | 2.273981511  | 1.793371291  | 1.083386046  |
| C  | 2.416245778  | -2.301627998 | -0.605741435 |
| C  | 2.652160193  | -3.143497534 | 0.654961965  |
| C  | 3.697777468  | -2.241522031 | -1.449253139 |
| C  | 1.302268936  | -2.967117924 | -1.439746818 |
| AL | -1.205680819 | 0.072135884  | -0.273983824 |
| C  | -1.090704913 | 2.048167534  | -0.290498031 |
| C  | -0.500010884 | 2.760828722  | -1.347822196 |
| C  | -1.467913772 | 2.796561070  | 0.838153983  |
| C  | -0.285953151 | 4.137781519  | -1.283701856 |
| C  | -1.260411659 | 4.172280202  | 0.916806979  |
| C  | -0.662434082 | 4.846406757  | -0.145738457 |
| C  | -2.937598113 | -0.845233387 | -0.118342186 |
| C  | -4.135216598 | -0.263353609 | -0.570165611 |
| C  | -3.032484984 | -2.121633199 | 0.464000376  |
| C  | -5.359570909 | -0.917873234 | -0.454060027 |
| C  | -4.251601395 | -2.785246478 | 0.589161674  |
| C  | -5.418965577 | -2.182464704 | 0.127352696  |
| C  | 0.311193866  | -1.129245186 | 2.075586401  |
| H  | -0.323589336 | -0.218295091 | -1.804271527 |
| H  | 0.657988461  | -0.184971377 | -1.482459155 |
| H  | 4.602104676  | 0.738786534  | 1.956490180  |
| H  | 3.344648179  | -0.437813389 | 2.359504848  |
| H  | 4.568964643  | -0.821403399 | 1.129412877  |
| H  | 3.294002918  | 1.645652817  | -1.450180453 |
| H  | 4.616793470  | 1.898972424  | -0.298644702 |
| H  | 4.497731598  | 0.370763648  | -1.179306860 |
| H  | 2.996687774  | 2.541953981  | 1.430999200  |
| H  | 1.606900921  | 2.277074158  | 0.362935785  |

|   |              |              |              |
|---|--------------|--------------|--------------|
| H | 1.669681983  | 1.476758966  | 1.937620628  |
| H | 3.000462319  | -4.141001285 | 0.357616717  |
| H | 3.408320957  | -2.712430272 | 1.316617332  |
| H | 1.726371715  | -3.271683031 | 1.222628247  |
| H | 4.552487156  | -1.868312147 | -0.876462615 |
| H | 3.949145841  | -3.253260755 | -1.790821515 |
| H | 3.573288918  | -1.611804106 | -2.337399850 |
| H | 0.349099220  | -2.992138719 | -0.900873031 |
| H | 1.142497159  | -2.451185944 | -2.392404544 |
| H | 1.588358575  | -4.002918749 | -1.660488522 |
| H | -0.494665852 | 5.918448339  | -0.087401122 |
| H | -1.562843014 | 4.719076812  | 1.806342419  |
| H | 0.175689763  | 4.656780159  | -2.120059844 |
| H | -0.189129466 | 2.227836228  | -2.246213688 |
| H | -1.932970385 | 2.296394019  | 1.687805570  |
| H | -2.131232750 | -2.608707559 | 0.835896768  |
| H | -4.293451591 | -3.770128834 | 1.047460103  |
| H | -6.372687896 | -2.694602178 | 0.222938840  |
| H | -6.268111937 | -0.442583008 | -0.814785903 |
| H | -4.113541688 | 0.727687480  | -1.021466706 |
| H | 1.197910739  | -1.453115708 | 2.623851869  |
| H | -0.617089757 | -1.167357112 | 2.647623299  |

### 3PAI<sup>c</sup>

Total number of atoms = 56

|    |              |              |              |
|----|--------------|--------------|--------------|
| C  | 0.071008942  | -0.940528539 | 0.377207282  |
| P  | 1.753852559  | -0.575048460 | -0.080719110 |
| C  | 2.726934220  | 0.479836894  | 1.116196274  |
| C  | 3.472962049  | -0.367847994 | 2.155770169  |
| C  | 3.707516024  | 1.351669069  | 0.312024891  |
| C  | 1.728034764  | 1.408524957  | 1.829515292  |
| C  | 2.616069570  | -2.089078378 | -0.743685009 |
| C  | 2.660397002  | -3.204246588 | 0.310786708  |
| C  | 4.031137377  | -1.748685701 | -1.232266296 |
| C  | 1.766068620  | -2.558560952 | -1.940746387 |
| AL | -1.290026145 | -0.139228173 | -0.962205021 |
| C  | -0.875607787 | 1.813811419  | -0.752555063 |
| C  | 0.038347534  | 2.465521550  | -1.600620982 |
| C  | -1.332502633 | 2.559553567  | 0.349636535  |
| C  | 0.491764709  | 3.764130131  | -1.358235235 |
| C  | -0.902377180 | 3.862296592  | 0.599919435  |
| C  | 0.022968351  | 4.465846636  | -0.250021171 |
| C  | -3.092319530 | -0.700628988 | -0.339308945 |
| C  | -4.132904480 | 0.221591502  | -0.131370319 |
| C  | -3.388234054 | -2.046006624 | -0.053950775 |

|   |              |              |              |
|---|--------------|--------------|--------------|
| C | -5.388625954 | -0.168052709 | 0.334342201  |
| C | -4.637424796 | -2.451838466 | 0.413023679  |
| C | -5.643385044 | -1.508807968 | 0.609834656  |
| C | -0.187244073 | -1.571929476 | 1.533095356  |
| H | -0.747704077 | -0.653670244 | -2.405572982 |
| H | 1.670429435  | 0.253567341  | -1.207895271 |
| H | 3.944972418  | 0.305879492  | 2.880265674  |
| H | 2.796659794  | -1.024836495 | 2.712775550  |
| H | 4.264549425  | -0.977769730 | 1.710609961  |
| H | 3.167976034  | 2.014532081  | -0.373202295 |
| H | 4.269114021  | 1.983189007  | 1.010093163  |
| H | 4.432564620  | 0.766874847  | -0.260400413 |
| H | 2.296054669  | 2.085699524  | 2.478481946  |
| H | 1.154214683  | 2.016667062  | 1.125022147  |
| H | 1.020553119  | 0.850387042  | 2.447996239  |
| H | 3.103013287  | -4.097515626 | -0.144651684 |
| H | 3.268700717  | -2.940243141 | 1.180480252  |
| H | 1.655524006  | -3.468226137 | 0.653293497  |
| H | 4.703541308  | -1.474208227 | -0.414222782 |
| H | 4.454526487  | -2.633665409 | -1.721231665 |
| H | 4.025333607  | -0.937788577 | -1.968998041 |
| H | 0.744988494  | -2.813627076 | -1.645275101 |
| H | 1.699554268  | -1.796725670 | -2.723439176 |
| H | 2.235646394  | -3.451554252 | -2.370112519 |
| H | 0.367225264  | 5.478328441  | -0.056277300 |
| H | -1.282413961 | 4.405473234  | 1.461839799  |
| H | 1.199140869  | 4.232313021  | -2.039208700 |
| H | 0.402899229  | 1.945954758  | -2.488161737 |
| H | -2.039218030 | 2.105940079  | 1.044286290  |
| H | -2.620514937 | -2.806947259 | -0.200806394 |
| H | -4.828362944 | -3.502190442 | 0.620380360  |
| H | -6.619889915 | -1.817776225 | 0.973920603  |
| H | -6.169163723 | 0.574758709  | 0.481010248  |
| H | -3.961161524 | 1.277085450  | -0.339230193 |
| H | 0.559030219  | -1.893816187 | 2.263901303  |
| H | -1.220733370 | -1.789815777 | 1.802227380  |

### 1PAI<sup>d</sup>

Total number of atoms = 67

|    |              |             |              |
|----|--------------|-------------|--------------|
| AL | -1.352812880 | 1.445960150 | -0.692553398 |
| C  | 0.045105593  | 0.442339634 | -1.649679611 |
| C  | -1.114671583 | 3.340490726 | -0.244839751 |
| C  | -0.554379473 | 4.236813248 | -1.171999915 |
| C  | -0.384812694 | 5.588217601 | -0.879842759 |
| C  | -0.770844166 | 6.081619855 | 0.363874490  |

|   |              |              |              |
|---|--------------|--------------|--------------|
| C | -1.324940021 | 5.219355080  | 1.306670164  |
| C | -1.495782683 | 3.871027838  | 1.000287794  |
| C | -3.041762139 | 0.522551879  | -0.330387100 |
| C | -4.060429325 | 1.103689086  | 0.445346701  |
| C | -5.232992072 | 0.415121574  | 0.749904373  |
| C | -5.418134187 | -0.882098561 | 0.277454812  |
| C | -4.433535586 | -1.480107069 | -0.505316034 |
| C | -3.266319299 | -0.782200802 | -0.805240084 |
| P | 0.583654793  | -0.115427836 | 0.060335922  |
| C | 2.429822560  | -0.058321531 | 0.226568643  |
| C | 3.161081525  | -1.078720890 | 0.878972623  |
| C | 3.124524776  | 1.082953528  | -0.232676066 |
| C | 4.555889637  | -1.008253887 | 0.894607115  |
| C | 4.518398611  | 1.103824169  | -0.189442427 |
| C | 5.259921625  | 0.052724400  | 0.336918185  |
| C | 0.051415862  | -1.874574607 | 0.009172752  |
| C | 0.498508355  | -2.763820863 | -0.994616530 |
| C | -0.900247925 | -2.309066522 | 0.952869386  |
| C | -0.073227600 | -4.031961020 | -1.075799293 |
| C | -1.441640441 | -3.590468279 | 0.830270177  |
| C | -1.059124402 | -4.457925661 | -0.186375454 |
| C | -1.357635831 | -1.456216632 | 2.113819408  |
| C | -1.692232464 | -5.817846975 | -0.332404158 |
| C | 1.644411220  | -2.447284078 | -1.928058770 |
| C | 2.441996002  | 2.345002096  | -0.711618042 |
| C | 6.765786660  | 0.106792123  | 0.377913501  |
| C | 2.539301778  | -2.238953084 | 1.627942364  |
| H | 5.107997734  | -1.810574459 | 1.380400586  |
| H | 5.035547238  | 1.986002953  | -0.563022563 |
| H | 0.271597684  | -4.715379897 | -1.849439070 |
| H | -2.187776270 | -3.914250957 | 1.552406543  |
| H | -0.516531852 | -1.000698187 | 2.646019728  |
| H | -2.010080173 | -0.643568070 | 1.779643069  |
| H | -1.922109265 | -2.063979386 | 2.826855723  |
| H | -2.140741748 | -6.154102551 | 0.607249478  |
| H | -2.485647712 | -5.796446052 | -1.089228541 |
| H | -0.959563840 | -6.567151659 | -0.649034141 |
| H | 1.669100602  | -3.158442403 | -2.758863072 |
| H | 1.597166324  | -1.438897130 | -2.342652302 |
| H | 2.601012119  | -2.521080695 | -1.397151446 |
| H | 1.459451909  | 2.492695667  | -0.256578577 |
| H | 3.048085312  | 3.214633893  | -0.439780418 |
| H | 2.315630143  | 2.372216923  | -1.799484042 |
| H | 7.112610059  | 0.755697877  | 1.191182486  |
| H | 7.197791575  | -0.885611979 | 0.538683083  |
| H | 7.174203616  | 0.507721966  | -0.555638014 |
| H | 1.664478585  | -1.933102256 | 2.207690052  |

|   |              |              |              |
|---|--------------|--------------|--------------|
| H | 2.221573646  | -3.052809984 | 0.969788106  |
| H | 3.270189800  | -2.647285832 | 2.332303219  |
| H | 0.805979858  | 1.015613406  | -2.177912834 |
| H | -0.264124879 | -0.406517067 | -2.262546916 |
| H | -2.505747913 | -1.280218093 | -1.403699334 |
| H | -4.571546884 | -2.491563271 | -0.877965064 |
| H | -3.938825715 | 2.117869189  | 0.822622612  |
| H | -6.001765775 | 0.889173922  | 1.354326718  |
| H | -6.329964949 | -1.423215244 | 0.515522342  |
| H | -0.228325966 | 3.872204426  | -2.145734914 |
| H | 0.048781258  | 6.256119728  | -1.619427874 |
| H | -0.637386870 | 7.134201910  | 0.597743422  |
| H | -1.623320791 | 5.598680806  | 2.280368455  |
| H | -1.926705337 | 3.217784004  | 1.757729955  |

### pre-IPAI<sup>d</sup>

Total number of atoms = 67

|    |              |              |              |
|----|--------------|--------------|--------------|
| C  | -0.290246171 | -1.079876105 | -1.585328295 |
| AL | 1.513655928  | -0.444430227 | -1.053461235 |
| C  | 2.040847487  | 1.411299247  | -1.396563859 |
| C  | 1.282538450  | 2.213348674  | -2.266352715 |
| C  | 3.087583919  | 2.045251087  | -0.704608367 |
| C  | 1.541063084  | 3.571937638  | -2.433153518 |
| C  | 3.358212499  | 3.402720237  | -0.863267184 |
| C  | 2.580452978  | 4.171094004  | -1.726245326 |
| C  | 2.821051546  | -1.820473377 | -0.570563319 |
| C  | 4.175076008  | -1.552049407 | -0.306739793 |
| C  | 2.417832499  | -3.167262143 | -0.506688860 |
| C  | 5.075191787  | -2.564378692 | 0.019065864  |
| C  | 3.308104628  | -4.188407766 | -0.181692159 |
| C  | 4.640733385  | -3.886059190 | 0.085369257  |
| P  | -1.109988054 | -1.385869498 | 0.049737916  |
| C  | -2.896374203 | -0.893026860 | -0.041579203 |
| C  | -3.535748673 | -0.390008576 | 1.113224855  |
| C  | -3.677390655 | -1.120263931 | -1.197113179 |
| C  | -4.872182371 | 0.008820601  | 1.044064125  |
| C  | -5.009078138 | -0.705445663 | -1.217394533 |
| C  | -5.620483111 | -0.103924791 | -0.121560671 |
| C  | -0.276647037 | 0.045206452  | 0.923066921  |
| C  | -0.510677661 | 1.414158089  | 0.623724409  |
| C  | 0.685988391  | -0.279852555 | 1.913640877  |
| C  | 0.240332578  | 2.392622057  | 1.268242844  |
| C  | 1.441110497  | 0.741620933  | 2.500381852  |
| C  | 1.238799954  | 2.080159507  | 2.187482677  |
| C  | 0.893062791  | -1.688524928 | 2.424142909  |



|   |              |              |              |
|---|--------------|--------------|--------------|
| C | 2.086742791  | 3.166420693  | 2.792805591  |
| C | -1.561222209 | 1.897306829  | -0.347785183 |
| C | -3.173550729 | -1.859627061 | -2.418651829 |
| C | -7.046520032 | 0.378834183  | -0.192490396 |
| C | -2.853893414 | -0.275867793 | 2.458840097  |
| H | -0.779112626 | -0.297620636 | -2.176016190 |
| H | -0.277045203 | -1.997346016 | -2.181729491 |
| H | 0.451101149  | 1.775782823  | -2.817430303 |
| H | 3.694628193  | 1.477612020  | -0.002253161 |
| H | 0.931324654  | 4.164390935  | -3.110213073 |
| H | 4.176200361  | 3.862447397  | -0.314054484 |
| H | 2.785779713  | 5.230732333  | -1.850860382 |
| H | 4.546637496  | -0.531234139 | -0.366351467 |
| H | 1.378025714  | -3.426989617 | -0.703027234 |
| H | 6.116498863  | -2.324676069 | 0.217089040  |
| H | 2.962646288  | -5.217657978 | -0.134720550 |
| H | 5.340070737  | -4.677461391 | 0.340559015  |
| H | -5.342386785 | 0.409522862  | 1.940338942  |
| H | -5.592917540 | -0.877446926 | -2.119976573 |
| H | 0.068805022  | 3.435829789  | 1.012258672  |
| H | 2.194180259  | 0.475510497  | 3.238468427  |
| H | -0.041425327 | -2.102403176 | 2.817713434  |
| H | 1.245880972  | -2.374143376 | 1.650750744  |
| H | 1.633453292  | -1.689848389 | 3.229056967  |
| H | 2.664436215  | 2.799146994  | 3.646085406  |
| H | 2.790337785  | 3.551765532  | 2.045194846  |
| H | 1.473410895  | 4.008761922  | 3.129583100  |
| H | -1.275277157 | 2.871887601  | -0.753314919 |
| H | -1.721334510 | 1.215968771  | -1.182387977 |
| H | -2.529651912 | 2.004172563  | 0.154964642  |
| H | -2.560361451 | -1.232623152 | -3.072097031 |
| H | -2.574489699 | -2.734496160 | -2.146573057 |
| H | -4.022571505 | -2.216490446 | -3.009217886 |
| H | -7.495564976 | 0.450314879  | 0.803038496  |
| H | -7.100555354 | 1.373932075  | -0.650819991 |
| H | -7.665836725 | -0.291653786 | -0.797448916 |
| H | -2.174100781 | -1.113376459 | 2.646506783  |
| H | -2.268717358 | 0.645086279  | 2.552885122  |
| H | -3.604040060 | -0.276270438 | 3.255283005  |

### TS13\_PAI<sup>d</sup>

Total number of atoms = 69

|    |              |              |              |
|----|--------------|--------------|--------------|
| C  | -0.295161366 | -1.337367219 | -0.869527062 |
| AL | -1.984011538 | -0.950134488 | 0.203250682  |
| C  | -3.434622879 | -2.266964063 | 0.028194838  |

|   |              |              |              |
|---|--------------|--------------|--------------|
| C | -3.244578501 | -3.521013131 | -0.577495586 |
| C | -4.725329171 | -1.986121198 | 0.511108661  |
| C | -4.277458111 | -4.449042906 | -0.692448377 |
| C | -5.766135640 | -2.906452707 | 0.405298366  |
| C | -5.542461254 | -4.142193108 | -0.196887215 |
| C | -2.488699735 | 0.957237430  | 0.367200356  |
| C | -1.942912239 | 1.814504070  | 1.337560671  |
| C | -3.355630835 | 1.545798694  | -0.570627694 |
| C | -2.221141510 | 3.179506457  | 1.362656027  |
| C | -3.639068609 | 2.910851830  | -0.562822772 |
| C | -3.067167186 | 3.732857300  | 0.404745820  |
| P | 0.951794231  | -0.451317227 | 0.089678016  |
| C | 0.996535818  | 1.357425970  | -0.152874605 |
| C | 1.546427626  | 2.079347416  | 0.931750027  |
| C | 0.397857876  | 2.061554517  | -1.220803010 |
| C | 1.468645741  | 3.470076616  | 0.939995436  |
| C | 0.333017186  | 3.452266551  | -1.154744898 |
| C | 0.841525381  | 4.175077379  | -0.081395411 |
| C | 2.625146506  | -1.181078454 | -0.038635689 |
| C | 3.518016084  | -0.899284140 | -1.092531547 |
| C | 3.010234885  | -2.074309815 | 0.984876292  |
| C | 4.786310681  | -1.478475590 | -1.077936645 |
| C | 4.284708280  | -2.638336941 | 0.948654073  |
| C | 5.193349164  | -2.341623333 | -0.063742648 |
| C | 2.089436996  | -2.453724480 | 2.123172823  |
| C | 6.581938663  | -2.926890354 | -0.052376218 |
| C | 3.135981617  | -0.030872486 | -2.263837177 |
| C | -0.204684382 | 1.408087540  | -2.438627769 |
| C | 0.671722229  | 5.669460241  | -0.012725390 |
| C | 2.185827433  | 1.395761875  | 2.117523790  |
| H | -0.073844152 | -2.398202319 | -0.669368545 |
| H | -0.293987791 | -1.199877033 | -1.950095701 |
| H | -2.265219297 | -3.783940555 | -0.976704069 |
| H | -4.923812292 | -1.022778340 | 0.979134446  |
| H | -4.098385863 | -5.410032804 | -1.167906048 |
| H | -6.751927302 | -2.661288401 | 0.792219927  |
| H | -6.350844633 | -4.863621055 | -0.281190785 |
| H | -1.265095601 | 1.412987639  | 2.090030108  |
| H | -3.824597340 | 0.925878046  | -1.335268255 |
| H | -1.769828905 | 3.812113377  | 2.122709783  |
| H | -4.311124341 | 3.331321020  | -1.306761156 |
| H | -3.285004496 | 4.797792722  | 0.416752182  |
| H | 1.888568450  | 4.013419267  | 1.783642837  |
| H | -0.153084065 | 3.986992173  | -1.967514906 |
| H | 5.473509596  | -1.256061840 | -1.891603454 |
| H | 4.576529811  | -3.329580858 | 1.736356438  |
| H | 1.852060190  | -1.591749842 | 2.756409099  |

|   |              |              |              |
|---|--------------|--------------|--------------|
| H | 1.136806406  | -2.863696941 | 1.768289894  |
| H | 2.558361516  | -3.213218509 | 2.754892017  |
| H | 6.986101883  | -3.021561416 | -1.064872053 |
| H | 7.265844055  | -2.286503622 | 0.517644269  |
| H | 6.593660622  | -3.916488519 | 0.414669264  |
| H | 2.264172839  | -0.447574203 | -2.780398216 |
| H | 2.883903105  | 0.989122556  | -1.958670146 |
| H | 3.953040663  | 0.023337297  | -2.988388500 |
| H | 0.453620594  | 0.651734986  | -2.871406156 |
| H | -1.160902486 | 0.933892226  | -2.199062303 |
| H | -0.398248705 | 2.159565717  | -3.208745137 |
| H | -0.349928564 | 5.916189864  | 0.301538280  |
| H | 1.362233855  | 6.121732847  | 0.705447780  |
| H | 0.835595899  | 6.137750083  | -0.988681424 |
| H | 1.457859399  | 0.771592275  | 2.650785481  |
| H | 3.019431716  | 0.747702505  | 1.825738360  |
| H | 2.569261176  | 2.135922983  | 2.825038519  |
| H | -0.104549668 | -0.809970704 | 1.397460935  |
| H | -1.004724218 | -1.127777519 | 1.724263315  |

### 3PAI<sup>d</sup>

Total number of atoms = 69

|    |              |              |              |
|----|--------------|--------------|--------------|
| C  | 0.064732850  | -1.798831657 | -0.915421276 |
| AL | 1.775558939  | -1.127787896 | -1.963019172 |
| C  | 3.379864051  | -1.660476282 | -0.896661893 |
| C  | 3.504950910  | -2.936204255 | -0.316113824 |
| C  | 4.443968617  | -0.770893348 | -0.665466415 |
| C  | 4.606157235  | -3.301941404 | 0.456234126  |
| C  | 5.553399025  | -1.119851019 | 0.104702215  |
| C  | 5.635349439  | -2.388135795 | 0.672742805  |
| C  | 1.559694083  | 0.871279659  | -2.088080784 |
| C  | 0.906016832  | 1.452025281  | -3.192286246 |
| C  | 1.944026734  | 1.759490686  | -1.066095140 |
| C  | 0.647133702  | 2.821527705  | -3.275256378 |
| C  | 1.697134415  | 3.131150379  | -1.133292448 |
| C  | 1.043966196  | 3.667611808  | -2.240490676 |
| P  | -0.902801108 | -0.449175481 | -0.305855965 |
| C  | -0.261200750 | 0.523483815  | 1.087477711  |
| C  | -0.707257279 | 1.864932616  | 1.150423585  |
| C  | 0.680406674  | 0.044592666  | 2.022492073  |
| C  | -0.206178382 | 2.694238728  | 2.149653465  |
| C  | 1.152994904  | 0.925222486  | 2.996106838  |
| C  | 0.732308503  | 2.248631678  | 3.075574311  |
| C  | -2.691047934 | -0.769496548 | -0.133196739 |
| C  | -3.237534732 | -1.332486440 | 1.037224470  |

|   |              |              |              |
|---|--------------|--------------|--------------|
| C | -3.527158881 | -0.464948718 | -1.230987825 |
| C | -4.613168248 | -1.538044050 | 1.107132493  |
| C | -4.897695328 | -0.693243910 | -1.109520823 |
| C | -5.461621529 | -1.220015811 | 0.048834357  |
| C | -3.015230601 | 0.095715992  | -2.541141255 |
| C | -6.942168286 | -1.482137235 | 0.142886523  |
| C | -2.384137979 | -1.747237449 | 2.209325511  |
| C | 1.237655974  | -1.355817277 | 2.032926401  |
| C | 1.298411167  | 3.181333007  | 4.113978079  |
| C | -1.661039115 | 2.471773696  | 0.149254730  |
| H | -0.564003393 | -2.269148865 | -1.683342724 |
| H | 0.271983200  | -2.546612279 | -0.148932686 |
| H | 2.713963796  | -3.673189492 | -0.463675788 |
| H | 4.409822916  | 0.226508855  | -1.101426362 |
| H | 4.664594510  | -4.298052589 | 0.888738886  |
| H | 6.354905696  | -0.401418781 | 0.260157212  |
| H | 6.496980143  | -2.665655682 | 1.274588100  |
| H | 0.596874502  | 0.813868373  | -4.020268659 |
| H | 2.444100740  | 1.370566361  | -0.179721143 |
| H | 0.149760230  | 3.231360337  | -4.151366450 |
| H | 2.010163471  | 3.779766232  | -0.318574891 |
| H | 0.852003302  | 4.735711994  | -2.301658902 |
| H | -0.550003332 | 3.724830346  | 2.194447753  |
| H | 1.881497100  | 0.558382665  | 3.715008482  |
| H | -5.033787068 | -1.967019908 | 2.013880527  |
| H | -5.544068258 | -0.453246263 | -1.950599641 |
| H | -2.636782579 | 1.119359377  | -2.433424975 |
| H | -2.207613465 | -0.507483314 | -2.970372648 |
| H | -3.822705241 | 0.123761408  | -3.276961900 |
| H | -7.506358282 | -0.849441689 | -0.548412007 |
| H | -7.164194657 | -2.526697242 | -0.106133123 |
| H | -7.315204045 | -1.300277039 | 1.155513019  |
| H | -1.629948415 | -2.480573973 | 1.902543665  |
| H | -1.862320614 | -0.898094460 | 2.660904731  |
| H | -2.995814420 | -2.217238914 | 2.983670051  |
| H | 0.455450940  | -2.119224147 | 2.018630012  |
| H | 1.898108252  | -1.528849144 | 1.178309419  |
| H | 1.830591426  | -1.516492078 | 2.936560608  |
| H | 0.579984586  | 3.960537059  | 4.385386115  |
| H | 1.581804506  | 2.642794072  | 5.023247445  |
| H | 2.197810667  | 3.677951863  | 3.731125070  |
| H | -1.166363640 | 2.601347506  | -0.822252564 |
| H | -2.566497671 | 1.873651813  | 0.005627024  |
| H | -1.975254030 | 3.463474371  | 0.484261143  |
| H | -0.880631286 | 0.492191556  | -1.330199316 |
| H | 1.594507098  | -1.817967438 | -3.415934554 |

## 1PAI<sup>e</sup>

Total number of atoms = 71

|    |              |              |              |
|----|--------------|--------------|--------------|
| C  | 0.413207479  | -1.247890083 | -1.000394032 |
| AL | 2.300686481  | -1.088965265 | -0.406258721 |
| P  | -0.607176018 | -0.696448913 | 0.434932101  |
| C  | 2.976527257  | -2.591743954 | 0.732777115  |
| C  | 3.481018071  | 0.360325657  | -1.096408928 |
| C  | -2.437665334 | -0.825884279 | 0.132575899  |
| C  | -5.271018160 | -0.870232799 | -0.082248449 |
| C  | -3.249305755 | -0.136949049 | 1.064604268  |
| C  | -3.072532104 | -1.598361406 | -0.866105525 |
| C  | -4.464616733 | -1.594741455 | -0.954888445 |
| C  | -4.638696757 | -0.159920438 | 0.929648369  |
| C  | -0.289863080 | 1.131524431  | 0.293677843  |
| C  | 0.387102750  | 3.882808413  | 0.147014418  |
| C  | 0.571728842  | 1.716404465  | 1.245967980  |
| C  | -0.825043337 | 1.950296095  | -0.729323500 |
| C  | -0.476845528 | 3.299690317  | -0.777682668 |
| C  | 0.897196198  | 3.072651931  | 1.152869743  |
| C  | 4.244329117  | 1.050330380  | 0.046496371  |
| C  | 2.683892508  | 1.418782138  | -1.874372949 |
| C  | 4.502954993  | -0.279937059 | -2.059165552 |
| C  | 4.421602507  | -2.965624819 | 0.359128336  |
| C  | 2.076570565  | -3.822424153 | 0.519194121  |
| C  | 2.946010731  | -2.233653598 | 2.229875608  |
| C  | -2.684821098 | 0.650771217  | 2.225198064  |
| C  | -2.336552304 | -2.458647879 | -1.868531851 |
| C  | 1.190991125  | 0.938810418  | 2.385959454  |
| C  | -1.791322720 | 1.456738427  | -1.781249920 |
| C  | -6.773266947 | -0.902693437 | -0.202126287 |
| C  | 0.753197680  | 5.341060298  | 0.043810051  |
| H  | -4.936597817 | -2.182543905 | -1.740134201 |
| H  | -5.241311386 | 0.393988730  | 1.647175318  |
| H  | -0.890545152 | 3.917538919  | -1.572681235 |
| H  | 1.569539845  | 3.502732568  | 1.892465484  |
| H  | 4.972314598  | 1.774562954  | -0.354434752 |
| H  | 4.805893707  | 0.337292476  | 0.664801710  |
| H  | 3.567431394  | 1.610221935  | 0.704016827  |
| H  | 2.123679150  | 0.979581389  | -2.710258874 |
| H  | 3.365349842  | 2.173498117  | -2.300315660 |
| H  | 1.966552185  | 1.946257178  | -1.238232280 |
| H  | 4.017880118  | -0.785402561 | -2.906643481 |
| H  | 5.151372452  | -1.009516689 | -1.560539438 |
| H  | 5.158746676  | 0.495428637  | -2.487381105 |
| H  | 4.519736905  | -3.263943135 | -0.693257193 |
| H  | 4.768616066  | -3.815714173 | 0.968571459  |

|   |              |              |              |
|---|--------------|--------------|--------------|
| H | 5.118738604  | -2.136774117 | 0.534633355  |
| H | 2.076253921  | -4.162113924 | -0.525851027 |
| H | 1.036176298  | -3.621376385 | 0.804786870  |
| H | 2.426554797  | -4.668229374 | 1.132469308  |
| H | 3.588205788  | -1.374129447 | 2.464617218  |
| H | 3.312228018  | -3.081403693 | 2.831643235  |
| H | 1.930795139  | -2.004524513 | 2.576058719  |
| H | -3.458978886 | 0.818312539  | 2.979855918  |
| H | -2.304417422 | 1.628625224  | 1.911052186  |
| H | -1.856146003 | 0.121544008  | 2.708411057  |
| H | -3.052286009 | -3.000362834 | -2.493444929 |
| H | -1.705546319 | -3.205085577 | -1.375896713 |
| H | -1.696407236 | -1.872337655 | -2.533241653 |
| H | 2.038478632  | 0.323761867  | 2.056668562  |
| H | 0.480878883  | 0.259676166  | 2.863119445  |
| H | 1.585330597  | 1.623079767  | 3.143199650  |
| H | -1.837355726 | 2.167358653  | -2.611825941 |
| H | -2.801298464 | 1.349603575  | -1.371645083 |
| H | -1.511713340 | 0.483429020  | -2.189114622 |
| H | -7.229884308 | -0.023897987 | 0.263627839  |
| H | -7.187285824 | -1.790703741 | 0.290863705  |
| H | -7.088362375 | -0.934404332 | -1.250339500 |
| H | -0.139597210 | 5.975815941  | 0.073892391  |
| H | 1.268347383  | 5.547527859  | -0.901178953 |
| H | 1.413722280  | 5.647131459  | 0.860279181  |
| H | 0.254483520  | -2.319137285 | -1.163094559 |
| H | 0.210462744  | -0.711024199 | -1.933113485 |

### TS13\_PAI<sup>e</sup>

Total number of atoms = 73

|    |              |              |              |
|----|--------------|--------------|--------------|
| C  | -0.899968498 | -0.613149743 | -1.096692493 |
| AL | -2.634825497 | -0.491762667 | 0.001373127  |
| P  | 0.421797869  | -0.165914044 | 0.060031445  |
| C  | -3.508726360 | 1.308029594  | 0.177248660  |
| C  | -3.766331227 | -2.149902839 | -0.118920582 |
| C  | 1.044373186  | 1.554262711  | 0.048323687  |
| C  | 2.079502523  | 4.170436195  | 0.340075169  |
| C  | 1.767892826  | 1.917174308  | 1.209004707  |
| C  | 0.826744112  | 2.521619725  | -0.958794279 |
| C  | 1.348620983  | 3.803062217  | -0.786524771 |
| C  | 2.278850135  | 3.209495838  | 1.324085697  |
| C  | 1.844219570  | -1.314762360 | -0.088435346 |
| C  | 3.990295687  | -3.140039976 | -0.170354059 |
| C  | 1.895247336  | -2.390848584 | 0.822347154  |
| C  | 2.852968370  | -1.177270571 | -1.064507402 |

|   |              |              |              |
|---|--------------|--------------|--------------|
| C | 3.908933146  | -2.086426307 | -1.078634015 |
| C | 2.968886666  | -3.280024750 | 0.764250558  |
| C | -4.423776260 | -2.442695521 | 1.240027407  |
| C | -2.916014899 | -3.368219447 | -0.510776083 |
| C | -4.869800477 | -1.968674232 | -1.175550052 |
| C | -4.012798293 | 1.797599103  | -1.191315955 |
| C | -2.526244478 | 2.343989188  | 0.745620712  |
| C | -4.711265276 | 1.220498130  | 1.131601749  |
| C | 2.012495787  | 0.958990064  | 2.351783018  |
| C | 0.051266355  | 2.262564273  | -2.227082876 |
| C | 0.823962488  | -2.623996387 | 1.863421154  |
| C | 2.813627547  | -0.102841997 | -2.120451425 |
| C | 2.607847725  | 5.572751081  | 0.495276398  |
| C | 5.132533126  | -4.121507347 | -0.229038313 |
| H | 1.177237259  | 4.542484954  | -1.565893476 |
| H | 2.839289478  | 3.472136321  | 2.218524496  |
| H | 4.687454195  | -1.974405896 | -1.830590886 |
| H | 3.005605290  | -4.104479923 | 1.472918766  |
| H | -5.044171072 | -3.353842290 | 1.189230230  |
| H | -5.076188614 | -1.625589764 | 1.570144091  |
| H | -3.674819860 | -2.603321844 | 2.027172712  |
| H | -2.467541169 | -3.256467753 | -1.506679486 |
| H | -3.526644045 | -4.286588446 | -0.533226966 |
| H | -2.098855203 | -3.546103143 | 0.202811286  |
| H | -4.455703064 | -1.768523213 | -2.173793212 |
| H | -5.544446726 | -1.139826033 | -0.926210491 |
| H | -5.490516498 | -2.876965721 | -1.260057185 |
| H | -3.199882148 | 1.901084703  | -1.922959737 |
| H | -4.495838155 | 2.785722171  | -1.105440032 |
| H | -4.754151854 | 1.112363334  | -1.623287194 |
| H | -2.137702531 | 2.043288300  | 1.727942878  |
| H | -3.016948701 | 3.323767706  | 0.875538391  |
| H | -1.661525407 | 2.507397167  | 0.092182200  |
| H | -5.486018600 | 0.540004512  | 0.756828850  |
| H | -5.183363181 | 2.209388600  | 1.260395366  |
| H | -4.418473425 | 0.868521800  | 2.129930953  |
| H | 2.534857627  | 1.465639618  | 3.167745752  |
| H | 2.621793561  | 0.100427432  | 2.048170149  |
| H | 1.069635159  | 0.568959326  | 2.752029730  |
| H | 0.475476842  | 1.440024102  | -2.808753187 |
| H | 0.059385129  | 3.152533792  | -2.861952240 |
| H | -0.994220118 | 2.019528740  | -2.017389404 |
| H | -0.174781677 | -2.705698665 | 1.418970038  |
| H | 0.783834245  | -1.810861511 | 2.596457445  |
| H | 1.016390693  | -3.553903884 | 2.405624270  |
| H | 3.613713368  | -0.248680508 | -2.851388803 |
| H | 2.922228961  | 0.898617483  | -1.693070294 |

|   |              |              |              |
|---|--------------|--------------|--------------|
| H | 1.861867554  | -0.131839636 | -2.661446413 |
| H | -1.694593964 | -0.648762673 | 1.540890196  |
| H | -0.723492144 | -0.439394200 | 1.267334485  |
| H | 3.016837003  | 5.951038339  | -0.447290578 |
| H | 3.395349421  | 5.621260948  | 1.252954296  |
| H | 1.807969564  | 6.256667902  | 0.802916537  |
| H | 4.947114512  | -4.888008600 | -0.991093301 |
| H | 5.269105301  | -4.632865004 | 0.728465122  |
| H | 6.072314277  | -3.623099984 | -0.486957042 |
| H | -0.750992012 | -1.691965108 | -1.251284637 |
| H | -0.860876685 | -0.148712307 | -2.080666485 |

### 3PAI<sup>e</sup>

Total number of atoms = 73

|    |              |              |              |
|----|--------------|--------------|--------------|
| C  | -1.075936493 | -0.034164973 | -0.786819343 |
| AL | -2.794048654 | -0.008265671 | 0.430364672  |
| P  | 0.397116429  | -0.013693065 | 0.176911572  |
| C  | -3.088884589 | 1.969124731  | 0.769274363  |
| C  | -4.171103715 | -1.040387060 | -0.620890989 |
| C  | 1.632636497  | 1.328246166  | -0.007846848 |
| C  | 3.631827308  | 3.322962934  | -0.114620961 |
| C  | 2.603396410  | 1.428521720  | 1.019139084  |
| C  | 1.656179804  | 2.250931217  | -1.079119461 |
| C  | 2.660377068  | 3.219415838  | -1.103855136 |
| C  | 3.582640862  | 2.416411918  | 0.938336413  |
| C  | 1.218563131  | -1.637208708 | 0.093210196  |
| C  | 2.458168170  | -4.155228781 | -0.089246751 |
| C  | 1.071671438  | -2.567583653 | 1.144259049  |
| C  | 1.963073783  | -1.976333408 | -1.058504953 |
| C  | 2.571099875  | -3.226059295 | -1.122208106 |
| C  | 1.700939701  | -3.808469888 | 1.024032850  |
| C  | -5.575489201 | -0.827731324 | -0.036187205 |
| C  | -3.825664759 | -2.535572620 | -0.538564727 |
| C  | -4.193290445 | -0.631062872 | -2.101564690 |
| C  | -3.554634032 | 2.706689882  | -0.493434222 |
| C  | -1.787347076 | 2.624091724  | 1.257152173  |
| C  | -4.150505188 | 2.153068884  | 1.864724904  |
| C  | 2.632147364  | 0.523904503  | 2.229643955  |
| C  | 0.655632496  | 2.303028756  | -2.211186388 |
| C  | 0.267822429  | -2.300129501 | 2.394261448  |
| C  | 2.111807673  | -1.047156519 | -2.238322066 |
| C  | 4.680121273  | 4.402789148  | -0.168157844 |
| C  | 3.145476931  | -5.492312896 | -0.183553815 |
| H  | 2.678014204  | 3.924620281  | -1.931339017 |
| H  | 4.327553852  | 2.478530006  | 1.728006189  |



|   |              |              |              |
|---|--------------|--------------|--------------|
| H | 3.141412926  | -3.486320593 | -2.011177967 |
| H | 1.584938705  | -4.529177576 | 1.829812864  |
| H | -6.326759460 | -1.445832349 | -0.558807996 |
| H | -5.898302676 | 0.217757228  | -0.129711271 |
| H | -5.622054872 | -1.091840961 | 1.029215170  |
| H | -2.827845358 | -2.748167368 | -0.950399500 |
| H | -4.545145662 | -3.148076079 | -1.110169324 |
| H | -3.834418077 | -2.898148714 | 0.497475483  |
| H | -3.223878123 | -0.803149285 | -2.590431267 |
| H | -4.441033040 | 0.429959837  | -2.233680872 |
| H | -4.942463099 | -1.212654615 | -2.666873906 |
| H | -2.837260989 | 2.606876209  | -1.322599196 |
| H | -3.682709010 | 3.788171880  | -0.309813382 |
| H | -4.517762943 | 2.323621504  | -0.854050863 |
| H | -0.993679379 | 2.594909538  | 0.494312290  |
| H | -1.397720497 | 2.138571006  | 2.163734425  |
| H | -1.936699426 | 3.690404911  | 1.502221460  |
| H | -5.118675372 | 1.727685116  | 1.570994182  |
| H | -4.319565672 | 3.221491995  | 2.087800696  |
| H | -3.850746352 | 1.665404894  | 2.801709227  |
| H | 3.492911419  | 0.764874082  | 2.858049432  |
| H | 2.707909714  | -0.533866540 | 1.959302153  |
| H | 1.735432378  | 0.650933680  | 2.848078944  |
| H | 1.009321369  | 2.990749471  | -2.983455475 |
| H | -0.312829519 | 2.679981769  | -1.863503722 |
| H | 0.489057729  | 1.333845155  | -2.683717726 |
| H | -0.750418569 | -1.961201480 | 2.174316828  |
| H | 0.739902192  | -1.536530810 | 3.024440324  |
| H | 0.193764958  | -3.211502250 | 2.993031150  |
| H | 2.623801428  | -1.553188191 | -3.060794932 |
| H | 2.688342585  | -0.151509619 | -1.985465712 |
| H | 1.135848405  | -0.721380114 | -2.613569499 |
| H | -2.363675985 | -0.734979470 | 1.830542392  |
| H | 0.063616826  | 0.121320963  | 1.527443888  |
| H | 5.591843416  | 4.102093271  | 0.356422049  |
| H | 4.310892778  | 5.319191688  | 0.307216256  |
| H | 4.943109060  | 4.650380954  | -1.201008546 |
| H | 4.225110308  | -5.383062822 | -0.027489268 |
| H | 3.001385018  | -5.942602781 | -1.171029642 |
| H | 2.768274311  | -6.191335974 | 0.568156347  |
| H | -1.211810927 | 0.866635851  | -1.379730130 |
| H | -1.055462841 | -0.909349716 | -1.441582417 |

## 1PAI<sup>f</sup>

Total number of atoms = 72

|    |              |              |              |
|----|--------------|--------------|--------------|
| C  | -0.058059671 | -1.117736745 | -0.799515680 |
| C  | 0.482364447  | -1.554761518 | -1.945753941 |
| P  | 0.830733646  | -0.404993470 | 0.636403326  |
| AL | -1.992362274 | -1.260567857 | -0.412852403 |
| C  | -3.338244095 | -0.223093762 | -1.456954755 |
| C  | -2.719257439 | 0.440940478  | -2.695443204 |
| C  | -4.516533511 | -1.106561077 | -1.901167090 |
| C  | -3.878231016 | 0.885734140  | -0.530645498 |
| C  | -2.573869418 | -2.601349480 | 0.945359417  |
| C  | -3.067398743 | -3.814182025 | 0.124632124  |
| C  | -3.727358918 | -2.098484959 | 1.827293299  |
| C  | -1.423460984 | -3.079611900 | 1.843711020  |
| C  | 0.041128072  | 1.270156507  | 0.509492023  |
| C  | -1.435198907 | 3.683111915  | 0.419585309  |
| C  | -0.690888718 | 1.707745573  | 1.637061507  |
| C  | 0.042569266  | 2.066426776  | -0.659791812 |
| C  | -0.694786546 | 3.250868357  | -0.677756064 |
| C  | -1.410269389 | 2.902532633  | 1.571261940  |
| C  | 2.638995888  | -0.322662052 | 0.253708280  |
| C  | 5.407062269  | -0.477278494 | -0.348424566 |
| C  | 3.450677257  | 0.835400141  | 0.308034563  |
| C  | 3.266603197  | -1.575729686 | 0.045302742  |
| C  | 4.624410465  | -1.623008555 | -0.276191792 |
| C  | 4.804869178  | 0.731542244  | -0.012577694 |
| C  | -2.262621155 | 4.940168598  | 0.349655169  |
| C  | -0.722705744 | 0.936080500  | 2.939356695  |
| C  | 0.828423265  | 1.722230296  | -1.902954672 |
| C  | 2.967075754  | 2.194075074  | 0.768395326  |
| C  | 6.861315650  | -0.541177396 | -0.738613551 |
| C  | 2.552098378  | -2.896423475 | 0.232224580  |
| H  | -1.035981058 | -2.281934993 | 2.487141737  |
| H  | -1.763380137 | -3.898646808 | 2.498481995  |
| H  | -4.067900970 | -2.892071746 | 2.512058603  |
| H  | -3.401086753 | -4.620481649 | 0.797634620  |
| H  | -3.915759609 | -3.567216448 | -0.525677882 |
| H  | -4.597410542 | -1.785970560 | 1.236597546  |
| H  | -3.427084007 | -1.244027276 | 2.448406140  |
| H  | -0.576499034 | -3.456434163 | 1.256834513  |
| H  | -2.272268591 | -4.238634505 | -0.505183626 |
| H  | -3.487693919 | 0.993833332  | -3.260224333 |
| H  | -5.266334906 | -0.502349194 | -2.437212580 |
| H  | -5.028285210 | -1.574003828 | -1.051161585 |
| H  | -1.942998702 | 1.160560754  | -2.415910820 |
| H  | -4.202032766 | -1.908253644 | -2.582680157 |
| H  | -2.270867849 | -0.287912556 | -3.383113028 |
| H  | -4.636026477 | 1.489012954  | -1.057745330 |
| H  | -4.360061111 | 0.479334397  | 0.368193875  |

|   |              |              |              |
|---|--------------|--------------|--------------|
| H | -3.087293010 | 1.573281179  | -0.206863509 |
| H | 5.415162329  | 1.632293987  | 0.021678383  |
| H | 5.085757055  | -2.593668444 | -0.447725832 |
| H | -0.685256005 | 3.857237480  | -1.581740206 |
| H | -1.968181023 | 3.230150940  | 2.445835737  |
| H | 1.552400209  | -1.502479741 | -2.160128746 |
| H | 7.283894441  | -1.532477489 | -0.547066109 |
| H | 7.455831880  | 0.194193590  | -0.186790422 |
| H | 6.988970023  | -0.330336446 | -1.807426814 |
| H | 3.824606220  | 2.803077456  | 1.069861896  |
| H | 1.750453867  | 1.181939928  | -1.681403571 |
| H | 2.434232711  | 2.743185844  | -0.013031381 |
| H | 2.293883027  | 2.124665531  | 1.626650436  |
| H | 3.282668063  | -3.696610421 | 0.382455855  |
| H | 1.928170649  | -3.168364879 | -0.624295592 |
| H | 1.895056456  | -2.872856223 | 1.109486405  |
| H | 1.087761403  | 2.635954882  | -2.446937150 |
| H | -1.797333784 | 5.689313957  | -0.298646494 |
| H | -3.256371168 | 4.722832688  | -0.060472708 |
| H | -2.403303352 | 5.383707519  | 1.340034933  |
| H | -1.264610298 | 1.502929753  | 3.702301365  |
| H | 0.283798591  | 0.730896960  | 3.316895390  |
| H | -1.217332143 | -0.034745689 | 2.828942538  |
| H | 0.243437089  | 1.084801674  | -2.573389106 |
| H | -0.127279426 | -1.971156638 | -2.749335706 |

### TS13\_PAI<sup>f</sup>

Total number of atoms = 74

|    |              |              |              |
|----|--------------|--------------|--------------|
| C  | 0.666770090  | -1.230304139 | 2.107374969  |
| C  | 0.890311595  | -0.552960940 | 0.973231736  |
| AL | 2.624815156  | -0.427110836 | -0.107497974 |
| P  | -0.471398777 | -0.132646069 | -0.144226916 |
| C  | 3.499765737  | 1.379458450  | -0.205025165 |
| C  | 3.762452957  | -2.084644404 | -0.013802179 |
| C  | -1.079169982 | 1.586628425  | -0.099831168 |
| C  | -2.092421527 | 4.210572905  | -0.304011544 |
| C  | -1.819840237 | 1.979662910  | -1.238704904 |
| C  | -0.834237449 | 2.518130776  | 0.931098658  |
| C  | -1.346613370 | 3.809211164  | 0.800467828  |
| C  | -2.320711470 | 3.277553986  | -1.311259912 |
| C  | -1.877020236 | -1.292974466 | 0.009596901  |
| C  | -3.958086996 | -3.189318298 | 0.101292086  |
| C  | -1.834448825 | -2.434768571 | -0.820084282 |
| C  | -2.956169024 | -1.111116466 | 0.897925171  |
| C  | -3.975498120 | -2.063860416 | 0.920211778  |

|   |              |              |              |
|---|--------------|--------------|--------------|
| C | -2.872969504 | -3.360812695 | -0.755208415 |
| C | 4.485489131  | -2.299020192 | -1.354510760 |
| C | 2.934423268  | -3.343583168 | 0.282135440  |
| C | 4.814926838  | -1.922758062 | 1.097552818  |
| C | 3.967052931  | 1.829135650  | 1.190293389  |
| C | 2.526370560  | 2.428111736  | -0.766494019 |
| C | 4.727880920  | 1.331847681  | -1.129245075 |
| C | -2.099472250 | 1.038663684  | -2.387885124 |
| C | -0.045248517 | 2.202335321  | 2.177664740  |
| C | -0.697100886 | -2.683865123 | -1.782139980 |
| C | -3.061611108 | 0.062590283  | 1.839516562  |
| C | -2.609598201 | 5.620586565  | -0.424099564 |
| C | -5.088527831 | -4.185498012 | 0.126172961  |
| H | -0.327583767 | -1.456755716 | 2.500375242  |
| H | -1.155574076 | 4.526588885  | 1.595448171  |
| H | -2.896631992 | 3.569687784  | -2.186760536 |
| H | -4.804871570 | -1.924933393 | 1.610493244  |
| H | -2.832874059 | -4.241069371 | -1.393189381 |
| H | 5.135249090  | -1.456420159 | -1.618298668 |
| H | 3.774063609  | -2.437010334 | -2.179622250 |
| H | 5.121092695  | -3.200252296 | -1.317426295 |
| H | 2.398134346  | -3.278061826 | 1.236052139  |
| H | 3.582400113  | -4.235245688 | 0.329460936  |
| H | 2.186656315  | -3.533186265 | -0.499464203 |
| H | 4.353937877  | -1.778508074 | 2.085156335  |
| H | 5.477110646  | -1.066741080 | 0.915758928  |
| H | 5.455460057  | -2.818291401 | 1.168605155  |
| H | 4.702973538  | 1.135683524  | 1.618443335  |
| H | 3.137471594  | 1.905271768  | 1.905485868  |
| H | 4.445934520  | 2.821955947  | 1.145793773  |
| H | 2.170486216  | 2.158304604  | -1.769827793 |
| H | 3.014614825  | 3.414253449  | -0.848457144 |
| H | 1.641282667  | 2.564694130  | -0.134698473 |
| H | 5.499504887  | 0.648359477  | -0.753656127 |
| H | 5.192739319  | 2.328728581  | -1.214965738 |
| H | 4.466429212  | 1.008158741  | -2.145632921 |
| H | -2.616326951 | 1.564469170  | -3.195210446 |
| H | -2.727985986 | 0.194249236  | -2.082384458 |
| H | -1.172515841 | 0.623566100  | -2.800482230 |
| H | 0.003717877  | 3.081992223  | 2.825234727  |
| H | 0.976925990  | 1.895848412  | 1.944382023  |
| H | -0.488339007 | 1.385189744  | 2.753416142  |
| H | 0.276897324  | -2.674376546 | -1.280054577 |
| H | -0.662723378 | -1.921289729 | -2.568918100 |
| H | -0.809074268 | -3.658540513 | -2.264748213 |
| H | -3.852332999 | -0.108336390 | 2.575275939  |
| H | -3.287725133 | 0.992979632  | 1.308927427  |

|   |              |              |              |
|---|--------------|--------------|--------------|
| H | -2.129166033 | 0.220833220  | 2.388031050  |
| H | 1.673645852  | -0.515782256 | -1.632252822 |
| H | 0.673668383  | -0.343132554 | -1.339243745 |
| H | -2.720816400 | 6.091226534  | 0.557344758  |
| H | -3.580725167 | 5.647051341  | -0.928297020 |
| H | -1.918302572 | 6.237331722  | -1.010774833 |
| H | -4.728412960 | -5.201217242 | -0.064351244 |
| H | -5.830085675 | -3.948718890 | -0.646244997 |
| H | -5.604161175 | -4.180864686 | 1.091120306  |
| H | 1.494025673  | -1.609585261 | 2.707636432  |

### 3PAI<sup>f</sup>

Total number of atoms = 74

|    |              |              |              |
|----|--------------|--------------|--------------|
| C  | 0.146081321  | -1.643245390 | 1.758150392  |
| C  | 0.509763250  | -0.983393321 | 0.651840139  |
| AL | 2.390439504  | -0.892306724 | -0.268205268 |
| P  | -0.738130439 | -0.161721282 | -0.336160430 |
| C  | 3.636406351  | 0.254964608  | 0.844004474  |
| C  | 2.980961088  | -2.805374804 | -0.598331062 |
| C  | -0.415097054 | 1.615560670  | -0.369784189 |
| C  | 0.184780418  | 4.353259170  | -0.432495720 |
| C  | -0.288382655 | 2.272621198  | -1.611592101 |
| C  | -0.255207052 | 2.322675172  | 0.837632575  |
| C  | 0.033880441  | 3.683440513  | 0.777946002  |
| C  | 0.010885414  | 3.632678802  | -1.612203507 |
| C  | -2.496783088 | -0.614654400 | -0.089082511 |
| C  | -5.102734852 | -1.615126734 | 0.345207289  |
| C  | -2.795381186 | -1.977992362 | -0.339743797 |
| C  | -3.534992717 | 0.265002283  | 0.304973700  |
| C  | -4.807588021 | -0.266441778 | 0.519072281  |
| C  | -4.086148401 | -2.448253038 | -0.106585440 |
| C  | 4.052138978  | -2.797512541 | -1.701883980 |
| C  | 1.811468245  | -3.671740785 | -1.084269422 |
| C  | 3.569170402  | -3.467373808 | 0.656192757  |
| C  | 3.566837075  | -0.115960940 | 2.333008384  |
| C  | 3.283958874  | 1.741500372  | 0.694806162  |
| C  | 5.085685775  | 0.068729866  | 0.365268592  |
| C  | -0.457115797 | 1.573899956  | -2.938974375 |
| C  | -0.373191064 | 1.684384509  | 2.200847857  |
| C  | -1.791788734 | -2.949216231 | -0.914432842 |
| C  | -3.403818708 | 1.763998247  | 0.461913473  |
| C  | 0.548523335  | 5.814095692  | -0.470221616 |
| C  | -6.483017225 | -2.146545238 | 0.628519631  |
| H  | -0.880276118 | -1.723940723 | 2.128530968  |
| H  | 0.157012018  | 4.231669785  | 1.708885881  |

|   |              |              |              |
|---|--------------|--------------|--------------|
| H | 0.114406000  | 4.144392405  | -2.565953634 |
| H | -5.603691425 | 0.409040664  | 0.823382695  |
| H | -4.300267221 | -3.497164642 | -0.296035107 |
| H | 4.396875844  | -3.821918434 | -1.929383607 |
| H | 4.937473991  | -2.215741629 | -1.416032672 |
| H | 3.664973453  | -2.366938949 | -2.634834578 |
| H | 1.071468075  | -3.827672700 | -0.288795807 |
| H | 2.157059387  | -4.671988103 | -1.400155002 |
| H | 1.293530938  | -3.222649903 | -1.944474571 |
| H | 2.842433451  | -3.499710576 | 1.480476583  |
| H | 4.456681497  | -2.937994398 | 1.023456005  |
| H | 3.873903761  | -4.509855594 | 0.455247423  |
| H | 2.555874834  | 0.020855450  | 2.742120388  |
| H | 4.247826283  | 0.509081010  | 2.937432253  |
| H | 3.847150578  | -1.162720167 | 2.508805297  |
| H | 2.287583497  | 1.967358322  | 1.089663562  |
| H | 3.293962013  | 2.061774432  | -0.355156676 |
| H | 3.999149591  | 2.378843458  | 1.245435612  |
| H | 5.438344250  | -0.960687442 | 0.504601464  |
| H | 5.774696454  | 0.724058247  | 0.927079813  |
| H | 5.201040910  | 0.314155237  | -0.699329276 |
| H | -0.411289559 | 2.298735072  | -3.755393906 |
| H | -1.420294256 | 1.055363552  | -3.017404148 |
| H | 0.346486237  | 0.843161262  | -3.093652463 |
| H | -0.596778864 | 2.445706326  | 2.953536300  |
| H | 0.565725446  | 1.195872613  | 2.480319614  |
| H | -1.157475970 | 0.923446034  | 2.256571000  |
| H | -0.870197709 | -3.002975127 | -0.333022397 |
| H | -1.513872382 | -2.674418219 | -1.940113962 |
| H | -2.216583105 | -3.954936884 | -0.955841376 |
| H | -4.397257767 | 2.205502255  | 0.575662072  |
| H | -2.929509076 | 2.230890479  | -0.403985109 |
| H | -2.823258034 | 2.046411058  | 1.343031795  |
| H | 1.970715072  | -0.178510753 | -1.690783154 |
| H | -0.478887586 | -0.587333880 | -1.637437492 |
| H | 0.071481537  | 6.322359670  | -1.313930626 |
| H | 1.632378322  | 5.932690979  | -0.584079156 |
| H | 0.254332332  | 6.324613753  | 0.451380764  |
| H | -7.254422616 | -1.442484140 | 0.301223100  |
| H | -6.620307965 | -2.307080934 | 1.704354983  |
| H | -6.654801891 | -3.102694966 | 0.126047495  |
| H | 0.897082150  | -2.154635243 | 2.358925786  |

### 1PAI<sup>a</sup>

Total number of atoms = 82

|    |              |              |              |
|----|--------------|--------------|--------------|
| C  | -0.238882947 | -0.567895288 | -0.045189507 |
| C  | -0.276253133 | -1.716618887 | -0.746898934 |
| P  | 1.181748530  | 0.056138434  | 0.899221829  |
| AL | -2.061581986 | 0.135703255  | 0.379993514  |
| C  | -2.811575473 | 1.888876547  | -0.236518677 |
| C  | -2.424497320 | 2.307153765  | -1.661556787 |
| C  | -4.347229664 | 1.866878453  | -0.147570052 |
| C  | -2.273177251 | 2.961893047  | 0.733256523  |
| C  | -2.959876787 | -0.843593568 | 1.879815624  |
| C  | -4.322095894 | -1.418482116 | 1.457126811  |
| C  | -3.171740234 | 0.139026894  | 3.047866201  |
| C  | -2.082703028 | -1.999371589 | 2.383226557  |
| C  | 1.322379196  | 1.756996135  | 0.198373853  |
| C  | 1.315439336  | 4.445820054  | -0.671805706 |
| C  | 1.454262207  | 2.810941572  | 1.128278703  |
| C  | 1.224830909  | 2.060090088  | -1.176848552 |
| C  | 1.218534968  | 3.395399201  | -1.580654800 |
| C  | 1.452115468  | 4.131458647  | 0.676785923  |
| C  | 2.666329182  | -0.959600650 | 0.439437369  |
| C  | 4.731102370  | -2.806025851 | -0.197306309 |
| C  | 3.845386720  | -0.523083967 | -0.210377817 |
| C  | 2.610973648  | -2.304123903 | 0.893135378  |
| C  | 3.622307298  | -3.198659997 | 0.543705803  |
| C  | 4.834974386  | -1.459137240 | -0.524080655 |
| C  | -1.557143101 | -2.214211561 | -1.291208263 |
| C  | -4.119801936 | -3.075840741 | -2.079599304 |
| C  | -2.484770395 | -1.318919681 | -1.850243668 |
| C  | -1.925927976 | -3.561491181 | -1.178267524 |
| C  | -3.191659282 | -3.984058458 | -1.565038337 |
| C  | -3.759995158 | -1.742839078 | -2.231309651 |
| C  | 1.256136719  | 5.877752034  | -1.137295159 |
| C  | 1.599080955  | 2.569212275  | 2.614302870  |
| C  | 1.159066945  | 1.008102828  | -2.260108987 |
| C  | 4.172677048  | 0.918601349  | -0.538595594 |
| C  | 5.792619732  | -3.795837110 | -0.602231075 |
| C  | 1.525080076  | -2.812863807 | 1.814881563  |
| H  | -1.102816843 | -1.649540707 | 2.730285641  |
| H  | -2.569746675 | -2.511126463 | 3.229792253  |
| H  | -3.635972399 | -0.375692826 | 3.905104778  |
| H  | -4.813189195 | -1.910405658 | 2.313311575  |
| H  | -5.009144052 | -0.646272027 | 1.090662214  |
| H  | -3.831777732 | 0.972577065  | 2.778901836  |
| H  | -2.224953145 | 0.566396585  | 3.407349478  |
| H  | -1.910532745 | -2.750033871 | 1.602388327  |
| H  | -4.216414903 | -2.171353770 | 0.666527425  |
| H  | -2.812406455 | 3.315425876  | -1.880459373 |
| H  | -4.765243732 | 2.841310447  | -0.449130352 |

|   |              |              |              |
|---|--------------|--------------|--------------|
| H | -4.704462589 | 1.664780804  | 0.868609183  |
| H | -1.339591858 | 2.344713711  | -1.800333678 |
| H | -4.785973215 | 1.106592262  | -0.808109388 |
| H | -2.847913348 | 1.639295618  | -2.423994676 |
| H | -2.726950487 | 3.941996607  | 0.511388031  |
| H | -2.504171548 | 2.736705262  | 1.783142940  |
| H | -1.187309461 | 3.083649695  | 0.644562537  |
| H | 5.731378131  | -1.110395706 | -1.033251346 |
| H | 3.549462173  | -4.228867777 | 0.887014018  |
| H | 1.139200837  | 3.619902961  | -2.642850149 |
| H | 1.550718760  | 4.936090739  | 1.402281452  |
| H | 0.598681552  | -2.354474127 | -0.896980225 |
| H | -2.167009909 | -0.305796264 | -2.089515076 |
| H | -4.455649173 | -1.029543255 | -2.663829778 |
| H | -5.108807941 | -3.413740322 | -2.372471050 |
| H | -3.464186739 | -5.029512033 | -1.453879226 |
| H | -1.218045569 | -4.271394589 | -0.758402046 |
| H | 5.909953725  | -4.584448664 | 0.148183334  |
| H | 6.763063039  | -3.308346859 | -0.738515421 |
| H | 5.532351962  | -4.281457397 | -1.550671245 |
| H | 5.246963303  | 1.014131837  | -0.722025482 |
| H | 1.722088678  | 0.107347332  | -2.005951608 |
| H | 3.656881114  | 1.280417249  | -1.431551915 |
| H | 3.915563925  | 1.597989241  | 0.276704200  |
| H | 1.784165744  | -3.806193733 | 2.192508150  |
| H | 0.548661043  | -2.885068247 | 1.327723577  |
| H | 1.399751483  | -2.145871384 | 2.675041340  |
| H | 1.560268764  | 1.411042845  | -3.195673201 |
| H | 1.762308850  | 6.006565887  | -2.099380284 |
| H | 0.215017424  | 6.196042845  | -1.269587562 |
| H | 1.719408867  | 6.554637787  | -0.413113373 |
| H | 1.782909340  | 3.513189238  | 3.135877025  |
| H | 2.427677769  | 1.890157166  | 2.840547580  |
| H | 0.696555595  | 2.115987959  | 3.037813452  |
| H | 0.127770110  | 0.693080564  | -2.449213955 |

### TS13\_PAI<sup>a</sup>

Total number of atoms = 84

|    |              |              |              |
|----|--------------|--------------|--------------|
| C  | -0.868384590 | 0.993636394  | 1.194885471  |
| C  | -0.630785038 | 0.104182517  | 0.211696535  |
| AL | -1.898155999 | -0.838901806 | -1.102812192 |
| P  | 1.022322952  | 0.012952672  | -0.502451270 |
| C  | -2.082741943 | -2.839379369 | -0.948476360 |
| C  | -3.453214021 | 0.255762241  | -1.779564364 |
| C  | 2.098133845  | -1.300984708 | 0.165708264  |



|   |              |              |              |
|---|--------------|--------------|--------------|
| C | 3.883854670  | -3.340974976 | 0.942173597  |
| C | 3.226493819  | -1.604501860 | -0.630609071 |
| C | 1.858025449  | -2.033109591 | 1.348223227  |
| C | 2.759305089  | -3.037241301 | 1.703453710  |
| C | 4.101616716  | -2.608157834 | -0.220972383 |
| C | 1.867401603  | 1.632111786  | -0.426555418 |
| C | 3.023510449  | 4.200016544  | -0.469774490 |
| C | 1.603026726  | 2.512547165  | -1.500155426 |
| C | 2.702953236  | 2.043589476  | 0.629900291  |
| C | 3.268566835  | 3.320096678  | 0.578771278  |
| C | 2.182856644  | 3.777466968  | -1.498639456 |
| C | -3.480342232 | 0.106157867  | -3.313172837 |
| C | -3.327968641 | 1.750912033  | -1.451221545 |
| C | -4.798539644 | -0.244203638 | -1.224765487 |
| C | -2.868972656 | -3.265008940 | 0.301782211  |
| C | -0.703212726 | -3.516289125 | -0.913592530 |
| C | -2.823206101 | -3.362364993 | -2.191933447 |
| C | 3.530433328  | -0.866983636 | -1.914483168 |
| C | 0.687966751  | -1.799992269 | 2.274523324  |
| C | 0.714443561  | 2.119469182  | -2.656369399 |
| C | 3.023257820  | 1.176109911  | 1.823032508  |
| C | -2.160341401 | 1.187748466  | 1.871940703  |
| C | -4.629359276 | 1.615939666  | 3.130080436  |
| C | -2.468279260 | 2.431526992  | 2.437823394  |
| C | -3.095751507 | 0.152643033  | 1.980854691  |
| C | -4.322163206 | 0.365214458  | 2.600244219  |
| C | -3.696164637 | 2.648200430  | 3.051453714  |
| C | 4.818846881  | -4.451644520 | 1.344834320  |
| C | 3.627584103  | 5.580502677  | -0.493852515 |
| H | -0.074793329 | 1.653087638  | 1.563176174  |
| H | 2.574363511  | -3.600559515 | 2.615273100  |
| H | 4.971972490  | -2.829139376 | -0.835226899 |
| H | 3.915813469  | 3.636238332  | 1.394013575  |
| H | 1.973780451  | 4.453494814  | -2.325057320 |
| H | -4.326800024 | 0.668216849  | -3.743117227 |
| H | -3.593719119 | -0.938555683 | -3.629059422 |
| H | -2.562878714 | 0.491098005  | -3.777488030 |
| H | -3.361008792 | 1.941203553  | -0.373026758 |
| H | -4.156317366 | 2.317564407  | -1.909704446 |
| H | -2.394505917 | 2.184482223  | -1.834058149 |
| H | -4.874144612 | -0.095989504 | -0.141215175 |
| H | -4.964542316 | -1.309397971 | -1.428030908 |
| H | -5.637204680 | 0.305604471  | -1.685143212 |
| H | -2.338804741 | -3.003462573 | 1.228417015  |
| H | -3.020376091 | -4.357673067 | 0.323353906  |
| H | -3.863779510 | -2.800847309 | 0.344582709  |
| H | -0.092375894 | -3.245400688 | -1.785432937 |

|   |              |              |              |
|---|--------------|--------------|--------------|
| H | -0.804853219 | -4.615109317 | -0.916394147 |
| H | -0.128346585 | -3.253687584 | -0.018558356 |
| H | -3.839665713 | -2.959172437 | -2.274251333 |
| H | -2.912323725 | -4.461710573 | -2.159987519 |
| H | -2.292434013 | -3.107353734 | -3.119007392 |
| H | 4.400528446  | -1.305911409 | -2.409876646 |
| H | 3.745826438  | 0.192931189  | -1.736437555 |
| H | 2.687953307  | -0.914340136 | -2.614529728 |
| H | 0.711020685  | -2.525671178 | 3.091904205  |
| H | -0.270780539 | -1.898709735 | 1.759839567  |
| H | 0.700186972  | -0.798537608 | 2.715606578  |
| H | -0.278473486 | 1.794461025  | -2.323973825 |
| H | 1.147308125  | 1.293252077  | -3.232409885 |
| H | 0.571760334  | 2.963317459  | -3.336709878 |
| H | 3.504454997  | 1.770054175  | 2.605045940  |
| H | 3.696930531  | 0.354524709  | 1.558947600  |
| H | 2.122491365  | 0.729350340  | 2.253178055  |
| H | -1.742029723 | 3.238315172  | 2.373746081  |
| H | -2.853233551 | -0.832134314 | 1.592673442  |
| H | -5.037135907 | -0.449188078 | 2.671113640  |
| H | -3.925563872 | 3.622642584  | 3.472293011  |
| H | -5.587640110 | 1.782828519  | 3.612613421  |
| H | -0.649884004 | -0.725632940 | -2.382777598 |
| H | 0.262324725  | -0.462300946 | -1.880202648 |
| H | 5.858386749  | -4.205920090 | 1.105504602  |
| H | 4.569652891  | -5.378103799 | 0.813796548  |
| H | 4.754401033  | -4.657954117 | 2.417310763  |
| H | 2.857051336  | 6.345826183  | -0.344336682 |
| H | 4.106223821  | 5.783952818  | -1.457706615 |
| H | 4.379263732  | 5.703464150  | 0.291193866  |

### 3PAI<sup>a</sup>

Total number of atoms = 84

|    |              |              |              |
|----|--------------|--------------|--------------|
| C  | 0.780422524  | 1.147277633  | -0.997150515 |
| C  | 0.645419798  | 0.192097302  | -0.049831395 |
| AL | 1.988217818  | -0.778274743 | 1.273081178  |
| P  | -1.033842744 | -0.004283568 | 0.507166936  |
| C  | 2.380082049  | -2.712127160 | 0.794076868  |
| C  | 3.565086844  | 0.406563520  | 1.767394865  |
| C  | -1.948872889 | -1.440947405 | -0.125103719 |
| C  | -3.509283118 | -3.627841166 | -0.955853992 |
| C  | -3.036460939 | -1.876499277 | 0.667570491  |
| C  | -1.634090596 | -2.106261078 | -1.328696538 |
| C  | -2.427462526 | -3.187609199 | -1.712036574 |
| C  | -3.797990537 | -2.956713267 | 0.229592693  |

|   |              |              |              |
|---|--------------|--------------|--------------|
| C | -2.050638595 | 1.506242793  | 0.438609311  |
| C | -3.534631257 | 3.892341844  | 0.501158838  |
| C | -1.874408504 | 2.417684123  | 1.502751362  |
| C | -2.943281871 | 1.802598360  | -0.613032425 |
| C | -3.669541182 | 2.989866523  | -0.552568057 |
| C | -2.625794462 | 3.592417100  | 1.510955289  |
| C | 3.817452329  | 0.142081018  | 3.265040812  |
| C | 3.248985153  | 1.900616868  | 1.608030132  |
| C | 4.869853050  | 0.103744531  | 1.014871378  |
| C | 3.097733264  | -2.937619338 | -0.543671782 |
| C | 1.081160259  | -3.533279549 | 0.797654972  |
| C | 3.275986029  | -3.271522553 | 1.914444274  |
| C | -3.411568754 | -1.229765162 | 1.982177813  |
| C | -0.488215631 | -1.731335278 | -2.238362670 |
| C | -0.904692302 | 2.173025361  | 2.635787022  |
| C | -3.147419630 | 0.908614494  | -1.812724103 |
| C | 2.006983900  | 1.463197482  | -1.742585708 |
| C | 4.306767843  | 2.099767367  | -3.207812780 |
| C | 2.170657315  | 2.740331691  | -2.295068955 |
| C | 3.000149649  | 0.503152533  | -1.958652959 |
| C | 4.141658592  | 0.819321219  | -2.686262078 |
| C | 3.317122905  | 3.061673546  | -3.011050590 |
| C | -4.328838144 | -4.815569074 | -1.387525812 |
| C | -4.354111108 | 5.156157392  | 0.534170780  |
| H | -0.069758402 | 1.770051524  | -1.300486144 |
| H | -2.187008058 | -3.703516028 | -2.638332263 |
| H | -4.636980790 | -3.288140822 | 0.837109748  |
| H | -4.358228724 | 3.222924985  | -1.361727655 |
| H | -2.488448000 | 4.295031333  | 2.329422432  |
| H | 4.659709878  | 0.753998616  | 3.633055586  |
| H | 4.068858172  | -0.907668103 | 3.464685515  |
| H | 2.938259489  | 0.385635945  | 3.874886983  |
| H | 3.107503459  | 2.184080831  | 0.558968030  |
| H | 4.068851489  | 2.523465653  | 2.007163625  |
| H | 2.338815186  | 2.185624832  | 2.154990410  |
| H | 4.794748933  | 0.336825262  | -0.052536980 |
| H | 5.161437023  | -0.950381487 | 1.104978018  |
| H | 5.704382113  | 0.704294052  | 1.417906567  |
| H | 2.477670310  | -2.642269462 | -1.401957104 |
| H | 3.346157497  | -4.003478878 | -0.690928507 |
| H | 4.039398926  | -2.375588972 | -0.606103815 |
| H | 0.395673605  | -3.239624838 | -0.006259766 |
| H | 0.538209739  | -3.422324689 | 1.745569013  |
| H | 1.287909115  | -4.609660990 | 0.660102756  |
| H | 4.257194367  | -2.782071421 | 1.944244892  |
| H | 3.457134857  | -4.351511108 | 1.771838015  |
| H | 2.815803983  | -3.146468572 | 2.903935465  |

|   |              |              |              |
|---|--------------|--------------|--------------|
| H | -4.339062722 | -1.663017326 | 2.364554933  |
| H | -3.567248701 | -0.149529312 | 1.888674984  |
| H | -2.638376079 | -1.393515661 | 2.742965479  |
| H | -0.440843596 | -2.427107977 | -3.079914224 |
| H | 0.470251497  | -1.765252016 | -1.716001655 |
| H | -0.587013818 | -0.721067545 | -2.647345814 |
| H | 0.079371369  | 1.842335097  | 2.286768903  |
| H | -1.275459226 | 1.407725403  | 3.329369426  |
| H | -0.756690121 | 3.090742529  | 3.210332208  |
| H | -3.732186727 | 1.430831329  | -2.574579172 |
| H | -3.676931567 | -0.013244133 | -1.553268393 |
| H | -2.197324846 | 0.621984422  | -2.273119328 |
| H | 1.397147541  | 3.489816030  | -2.143184350 |
| H | 2.872214024  | -0.496180372 | -1.557119605 |
| H | 4.905191369  | 0.062683154  | -2.840547194 |
| H | 3.439048260  | 4.060106521  | -3.420370412 |
| H | 5.201681368  | 2.347066654  | -3.771120755 |
| H | 0.961584328  | -0.805167624 | 2.562563938  |
| H | -0.939088241 | -0.287062806 | 1.868521034  |
| H | -5.392651880 | -4.660932637 | -1.181533203 |
| H | -4.015422863 | -5.715392963 | -0.845383287 |
| H | -4.211262862 | -5.014486131 | -2.456585682 |
| H | -5.404397916 | 4.932157461  | 0.754179335  |
| H | -4.325695367 | 5.669585868  | -0.432501077 |
| H | -3.992634528 | 5.849420427  | 1.298782284  |

## TS14\_PAI<sup>a</sup>

Total number of atoms = 85

|   |               |               |               |
|---|---------------|---------------|---------------|
| C | -0.2514800000 | -1.4902900000 | -0.9879600000 |
| C | -0.2839400000 | -0.4791700000 | -0.1031600000 |
| P | 1.2301000000  | 0.1499900000  | 0.7123000000  |
| C | 2.6518500000  | -0.9824000000 | 0.3609100000  |
| C | 3.9035700000  | -0.5885400000 | -0.1736000000 |
| C | 2.4977900000  | -2.3241900000 | 0.7925200000  |
| C | 4.8864500000  | -1.5572200000 | -0.3859100000 |
| C | 3.5133500000  | -3.2507400000 | 0.5547600000  |
| C | 4.7062100000  | -2.8980500000 | -0.0635100000 |
| C | 1.4290600000  | 1.7600100000  | -0.1743500000 |
| C | 1.5200600000  | 2.9310700000  | 0.6084500000  |
| C | 1.3926200000  | 1.8823500000  | -1.5829600000 |
| C | 1.5023200000  | 4.1807900000  | -0.0140500000 |
| C | 1.3832100000  | 3.1514900000  | -2.1579800000 |
| C | 1.4088300000  | 4.3153400000  | -1.3942600000 |
| C | -3.2047000000 | -1.1965100000 | 1.5402000000  |

|    |               |               |               |
|----|---------------|---------------|---------------|
| C  | -2.8382300000 | 1.9362200000  | 0.0820200000  |
| Al | -2.0466300000 | 0.1736900000  | 0.6274000000  |
| C  | -0.1330300000 | 0.4346500000  | 3.1211000000  |
| C  | -1.4407100000 | -1.9877300000 | -1.7092200000 |
| C  | -1.6515200000 | -3.3606200000 | -1.8876700000 |
| C  | -2.3782300000 | -1.0933300000 | -2.2411800000 |
| C  | -2.7901900000 | -3.8237400000 | -2.5364800000 |
| C  | -3.5174100000 | -1.5555400000 | -2.8949700000 |
| C  | -3.7299700000 | -2.9225700000 | -3.0377300000 |
| C  | 1.4027800000  | 0.7075900000  | -2.5312400000 |
| C  | 1.3248000000  | 5.6712900000  | -2.0447300000 |
| C  | 1.6557200000  | 2.9233600000  | 2.1153200000  |
| C  | 1.2895100000  | -2.8222500000 | 1.5512000000  |
| C  | 5.7741400000  | -3.9229300000 | -0.3457000000 |
| C  | 4.2994600000  | 0.8392200000  | -0.4842400000 |
| C  | -4.2461100000 | -1.8331400000 | 0.6021800000  |
| C  | -3.9692600000 | -0.5238400000 | 2.6968500000  |
| C  | -2.3449600000 | -2.3328600000 | 2.1158300000  |
| C  | -2.0022000000 | 2.6645800000  | -0.9805000000 |
| C  | -4.2520300000 | 1.7019700000  | -0.4820700000 |
| C  | -2.9590300000 | 2.8717600000  | 1.2999300000  |
| O  | -1.0947300000 | 0.7835400000  | 2.5212500000  |
| O  | 0.6194100000  | 0.1479900000  | 3.9598100000  |
| H  | 0.6831700000  | -2.0024800000 | -1.2377100000 |
| H  | 5.8393000000  | -1.2416600000 | -0.8060500000 |
| H  | 3.3683700000  | -4.2773900000 | 0.8854900000  |
| H  | 1.5653000000  | 5.0748500000  | 0.6029100000  |
| H  | 1.3528300000  | 3.2323400000  | -3.2429500000 |
| H  | -0.9218100000 | -4.0664000000 | -1.4980700000 |
| H  | -2.1909800000 | -0.0242200000 | -2.1732800000 |
| H  | -2.9480000000 | -4.8918400000 | -2.6531700000 |
| H  | -4.2335100000 | -0.8444200000 | -3.2964500000 |
| H  | -4.6178800000 | -3.2878700000 | -3.5444100000 |
| H  | 1.9421200000  | -0.1522000000 | -2.1287800000 |
| H  | 0.3857900000  | 0.3747700000  | -2.7622200000 |
| H  | 1.8815700000  | 0.9951200000  | -3.4725600000 |
| H  | 1.8641900000  | 5.6928500000  | -2.9970100000 |
| H  | 0.2794700000  | 5.9291800000  | -2.2529000000 |
| H  | 1.7365000000  | 6.4524700000  | -1.3986700000 |
| H  | 0.6727500000  | 2.8980300000  | 2.6016200000  |
| H  | 2.2350100000  | 2.0737000000  | 2.4840700000  |
| H  | 2.1503500000  | 3.8394400000  | 2.4517300000  |
| H  | 0.9046700000  | -2.0726100000 | 2.2489700000  |
| H  | 0.4630600000  | -3.0906900000 | 0.8874500000  |
| H  | 1.5538800000  | -3.7088000000 | 2.1347900000  |
| H  | 5.7815500000  | -4.7104100000 | 0.4144300000  |
| H  | 5.6056000000  | -4.4045100000 | -1.3166200000 |

|   |               |               |               |
|---|---------------|---------------|---------------|
| H | 6.7681900000  | -3.4660500000 | -0.3738200000 |
| H | 3.8514100000  | 1.2126000000  | -1.4087800000 |
| H | 4.0118200000  | 1.5309900000  | 0.3110600000  |
| H | 5.3856900000  | 0.8998000000  | -0.5979100000 |
| H | -4.8846500000 | -1.0870400000 | 0.1144100000  |
| H | -3.7803600000 | -2.4345300000 | -0.1848400000 |
| H | -4.9087400000 | -2.5038300000 | 1.1744800000  |
| H | -4.6465400000 | 0.2619300000  | 2.3391500000  |
| H | -4.5891600000 | -1.2640700000 | 3.2289100000  |
| H | -3.3013600000 | -0.0696600000 | 3.4396100000  |
| H | -1.8150900000 | -2.8755100000 | 1.3240000000  |
| H | -1.5919200000 | -1.9768900000 | 2.8332400000  |
| H | -2.9719200000 | -3.0628000000 | 2.6539100000  |
| H | -1.0159300000 | 2.9425600000  | -0.5972200000 |
| H | -1.8388700000 | 2.0651100000  | -1.8859400000 |
| H | -2.5053400000 | 3.5933500000  | -1.2979500000 |
| H | -4.7031500000 | 2.6559000000  | -0.8014100000 |
| H | -4.2503000000 | 1.0372300000  | -1.3561600000 |
| H | -4.9254100000 | 1.2594400000  | 0.2618500000  |
| H | -3.5346500000 | 2.4228600000  | 2.1192000000  |
| H | -1.9746100000 | 3.1464700000  | 1.6994400000  |
| H | -3.4673800000 | 3.8086300000  | 1.0181000000  |

#### 4PAI<sup>a</sup>

Total number of atoms = 85

|    |               |               |               |
|----|---------------|---------------|---------------|
| C  | -0.8280753310 | 1.1963060250  | 1.1963582970  |
| C  | -0.6597883300 | 0.2180829390  | 0.2839564820  |
| P  | 0.9917905240  | 0.0215331470  | -0.3678756610 |
| C  | 1.9459054130  | 1.5794776880  | -0.3049448200 |
| C  | 2.8530886730  | 1.8486623920  | 0.7478547070  |
| C  | 1.7130970080  | 2.5578992010  | -1.2981824250 |
| C  | 3.5707219910  | 3.0428891330  | 0.7202837490  |
| C  | 2.4623546260  | 3.7339060330  | -1.2730635670 |
| C  | 3.4136820490  | 3.9864723510  | -0.2914878260 |
| C  | 1.9559485470  | -1.3659460950 | 0.3410947520  |
| C  | 3.1839575710  | -1.7039627940 | -0.2721019730 |
| C  | 1.5129035810  | -2.1007543350 | 1.4733448960  |
| C  | 3.8958565370  | -2.8072620720 | 0.2073428660  |
| C  | 2.2655802330  | -3.1925916600 | 1.8942120270  |
| C  | 3.4488252810  | -3.5793248590 | 1.2677658860  |
| C  | -3.4605623840 | 0.3923425530  | -1.6737522900 |
| C  | -2.3709718920 | -2.7270582860 | -0.6256912430 |
| Al | -1.9805120170 | -0.7761999720 | -0.9577224630 |
| C  | 0.5990050860  | -0.5415689650 | -2.1707916250 |

|   |               |               |               |
|---|---------------|---------------|---------------|
| C | -2.0885425170 | 1.5011833470  | 1.8886203990  |
| C | -2.3231452920 | 2.7999296310  | 2.3583348590  |
| C | -3.0608311220 | 0.5196071690  | 2.1089930070  |
| C | -3.5182817410 | 3.1199784100  | 2.9904674830  |
| C | -4.2524223070 | 0.8356821500  | 2.7517942250  |
| C | -4.4879739020 | 2.1376976100  | 3.1858256300  |
| C | 0.3051431800  | -1.7622152120 | 2.3177408180  |
| C | 4.2117819000  | -4.7863632870 | 1.7448224070  |
| C | 3.8533290100  | -0.9488645320 | -1.3992472890 |
| C | 0.6770723090  | 2.4202056090  | -2.3866166500 |
| C | 4.2416920110  | 5.2442664470  | -0.3108401740 |
| C | 3.0801432200  | 0.9466479900  | 1.9403916320  |
| C | -4.8164065750 | 0.0799454180  | -1.0159565240 |
| C | -3.5818627390 | 0.1085811280  | -3.1850992490 |
| C | -3.1954487610 | 1.8959246820  | -1.5033903650 |
| C | -3.1635593800 | -2.9867552540 | 0.6654013260  |
| C | -3.2098554830 | -3.2420112460 | -1.8122923270 |
| C | -1.0847040880 | -3.5704910110 | -0.5958553920 |
| O | -0.6372597570 | -0.8342231080 | -2.2899136070 |
| O | 1.4756676870  | -0.5901319090 | -3.0056332940 |
| H | 0.0031415310  | 1.8453562050  | 1.4924453230  |
| H | 4.2692088070  | 3.2477116310  | 1.5284652160  |
| H | 2.2828896070  | 4.4790011510  | -2.0446280020 |
| H | 4.8373762720  | -3.0582548610 | -0.2761545640 |
| H | 1.9183219770  | -3.7586735810 | 2.7551734120  |
| H | -1.5671233790 | 3.5662241560  | 2.2039954130  |
| H | -2.8766330280 | -0.5015521020 | 1.7894205510  |
| H | -3.6943660490 | 4.1350672160  | 3.3333836880  |
| H | -4.9979119900 | 0.0624138740  | 2.9114282940  |
| H | -5.4208945860 | 2.3848260420  | 3.6833370910  |
| H | 0.4083879690  | -0.7873988340 | 2.8058769670  |
| H | -0.6189222860 | -1.7261579320 | 1.7408901940  |
| H | 0.1842393090  | -2.5151154310 | 3.1008649920  |
| H | 4.3523254110  | -4.7612586220 | 2.8307140960  |
| H | 3.6648725280  | -5.7059353000 | 1.5072166900  |
| H | 5.1963111840  | -4.8510188680 | 1.2733643780  |
| H | 3.7306736820  | -1.4829317730 | -2.3449967780 |
| H | 3.4672408200  | 0.0558658060  | -1.5584476330 |
| H | 4.9243303670  | -0.8672224700 | -1.1855940540 |
| H | 1.0632374730  | 1.8540515310  | -3.2396399720 |
| H | -0.2305592870 | 1.9232237280  | -2.0354886070 |
| H | 0.3789375590  | 3.4095993580  | -2.7436684800 |
| H | 4.4615063580  | 5.5927008420  | 0.7030395220  |
| H | 5.2000161850  | 5.0652499010  | -0.8126233630 |
| H | 3.7331096480  | 6.0503683020  | -0.8478311750 |
| H | 2.1434864780  | 0.5668044750  | 2.3579554070  |
| H | 3.7034756670  | 0.0821736310  | 1.6943873360  |

|   |               |               |               |
|---|---------------|---------------|---------------|
| H | 3.5829393020  | 1.5078894960  | 2.7326993180  |
| H | -5.0899029660 | -0.9782725920 | -1.1041972700 |
| H | -4.8242362520 | 0.3380506850  | 0.0494487300  |
| H | -5.6217415460 | 0.6615457740  | -1.4959296780 |
| H | -3.8214643950 | -0.9407058350 | -3.3952283930 |
| H | -4.3866997700 | 0.7200254740  | -3.6272213200 |
| H | -2.6548811570 | 0.3446860160  | -3.7220550770 |
| H | -3.1113084010 | 2.1885718880  | -0.4509240110 |
| H | -2.2772081990 | 2.2125341760  | -2.0131316620 |
| H | -4.0192166180 | 2.4842956960  | -1.9420025310 |
| H | -2.5863093910 | -2.7360768480 | 1.5663643540  |
| H | -4.0992717000 | -2.4122381040 | 0.6995414600  |
| H | -3.4351023820 | -4.0522441740 | 0.7548212110  |
| H | -3.4008560310 | -4.3234690560 | -1.7071712410 |
| H | -4.1864443600 | -2.7495301470 | -1.8823513340 |
| H | -2.6949149530 | -3.0958649790 | -2.7705575510 |
| H | -0.5029014720 | -3.4543229320 | -1.5185471740 |
| H | -0.4252088520 | -3.3179927390 | 0.2408564020  |
| H | -1.3253523240 | -4.6426670880 | -0.4961482500 |
